# Supplementary material
Source: MDPI journal article supplement (https://www.mdpi.com/2073-4441/9/11/853)
Supplement: s1 [file s1]

**Table S1.** Non-technical compliance 2009 and 2011.

**MALAMULELE TREATMENT WATER PLANT**

**19 August 2009**

| TABLE 1.1<br>NON-TECHNICAL (MANAGEMENT) COMPLIANCE SCORING |             |
|------------------------------------------------------------|-------------|
| Criterion                                                  | Weight      |
| <b>2. NON-TECHNICAL ASSESSMENT</b>                         |             |
| <b>2A:</b> Management Issues                               | <b>0.1</b>  |
| <b>2B:</b> Management Practices                            | <b>0.2</b>  |
| <b>2C:</b> Human Resources                                 | <b>0.2</b>  |
| <b>2D:</b> Financial Systems                               | <b>0.1</b>  |
| <b>2E:</b> Communication Systems                           | <b>0.2</b>  |
| <b>2F:</b> Safety, Health and Environmental Quality        | <b>0.15</b> |
| <b>2G:</b> Community Involvement and Awareness             | <b>0.05</b> |
| <b>TOTAL</b>                                               | <b>1.0</b>  |

| NON-TECHNICAL COMPLIANCE (MANAGEMENT) SCORING: Table 1.2 |                                                                                                                                                                |          |       |
|----------------------------------------------------------|----------------------------------------------------------------------------------------------------------------------------------------------------------------|----------|-------|
| Criterion                                                |                                                                                                                                                                | Yes =1   | No =0 |
| <b>2. NON-TECHNICAL ASSESSMENT</b>                       |                                                                                                                                                                |          |       |
| <b>2A: Management Issues</b>                             |                                                                                                                                                                |          |       |
| <b>Assessment of strategic plans</b>                     | Does a strategic plan for the assessment of drinking water supply systems exist?                                                                               | <b>1</b> |       |
|                                                          | Are there preventive strategic plans for drinking water quality management?                                                                                    | <b>1</b> |       |
|                                                          | Is there a strategic plan for recruitment of personnel per water treatment plant available?                                                                    | <b>1</b> |       |
|                                                          | Is there a strategic plan for operational monitoring and verification of drinking water system?                                                                | <b>1</b> |       |
|                                                          | Is there a strategic plan for sharing and clarifying roles and responsibilities among all personnel involved in the production of safe drinking water quality? | <b>1</b> |       |
|                                                          | Does a strategic plan for training and development of water plant personnel, and for community involvement and awareness exist?                                | <b>1</b> |       |

|                                                     |                                                                                                                                                             |     |  |
|-----------------------------------------------------|-------------------------------------------------------------------------------------------------------------------------------------------------------------|-----|--|
|                                                     | Is there any funding strategic plan for implementation of drinking water quality management programmes?                                                     | 1   |  |
| Assessment of<br>tact plans                         | Does a tactical plan for handling emergencies including communication of such emergencies to communities exist?                                             | 1   |  |
|                                                     | Is the overall periodic overseeing of water care function performed?                                                                                        | 1   |  |
|                                                     | Is there maintenance and asset management plans?                                                                                                            | 1   |  |
| Assessment of operational<br>plans                  | Is the attendance of process controllers (and in particular shift workers) at the treatment plant monitored? Is there a clock-in-system for the attendance? | 1   |  |
|                                                     | Is the superintendent available to operators on a day-to-day basis?                                                                                         | 1   |  |
|                                                     | Is there a substitute system plan put in place when one of the operators is ill or away attending a course?                                                 | 1   |  |
|                                                     | Are the supervisors and process controllers aware of their job requirements? Are job descriptions available?                                                | 1   |  |
| Maximum possible score for <i>Management Issues</i> |                                                                                                                                                             | 14  |  |
| Total score attained for <i>Management Issues</i>   |                                                                                                                                                             | 14  |  |
| Weight for <i>Management Issues</i>                 |                                                                                                                                                             | 0.1 |  |
| Total weighted score for <i>Management Issues</i>   |                                                                                                                                                             | 0.1 |  |

| NON-TECHNICAL COMPLIANCE (MANAGEMENT) SCORING: Table 1.3 |                                                                                                                                                 |        |        |
|----------------------------------------------------------|-------------------------------------------------------------------------------------------------------------------------------------------------|--------|--------|
| Criterion                                                |                                                                                                                                                 | Yes =1 | No = 0 |
| <b>2. NON-TECHNICAL ASSESSMENT</b>                       |                                                                                                                                                 |        |        |
| <b>2B: Management Practices</b>                          |                                                                                                                                                 |        |        |
|                                                          | Do the WSPs use existing local (Emanti/DWAF) or international management practices? Are they implementing them in their water treatment plants? | 1      |        |
|                                                          | Are the WPSs able to understand the existing local or international practices and implementing them correctly?                                  | 1      |        |
|                                                          | When local or international practices are not available, are the WSPs able to draw their own criteria?                                          | 1      |        |
| Maximum possible score for <i>Management Practices</i>   |                                                                                                                                                 | 3      |        |
| Total score attained for <i>Management Practices</i>     |                                                                                                                                                 | 3      |        |
| Weight for <i>Management Practices</i>                   |                                                                                                                                                 | 0.2    |        |
| Total weighted score for <i>Management Practices</i>     |                                                                                                                                                 | 0.2    |        |

| NON-TECHNICAL COMPLIANCE (MANAGEMENT) SCORING: Table 1.4 |                                                                                                             |        |        |
|----------------------------------------------------------|-------------------------------------------------------------------------------------------------------------|--------|--------|
| Criterion                                                |                                                                                                             | Yes =1 | No = 0 |
| <b>2. NON-TECHNICAL ASSESSMENT</b>                       |                                                                                                             |        |        |
| <b>2C: Human Resources</b>                               |                                                                                                             |        |        |
| <b>Personnel at the plant</b>                            | Is the number of personnel related to the size of the plant?                                                |        | 0      |
|                                                          | Are the needs of process controllers/supervisors and shift workers per plants adequate?                     |        | 0      |
|                                                          | Are there specific guidelines/rules for shift workers and their deployment?                                 | 1      |        |
|                                                          | How many operators are there in total? How many shift workers?                                              | 1      |        |
| <b>Qualifications of Personnel</b>                       | How many operators with qualifications in the DWAF categories?                                              | 1      |        |
|                                                          | Are personnel being correctly applied according to their qualifications?                                    | 1      |        |
|                                                          | Are there guidelines or formal rules for upgrading of qualifications?                                       | 1      |        |
| <b>Training Needs</b>                                    | Are there in service training programmes and policies? What is the in-service training policy of the WSA?   | 1      |        |
|                                                          | Do process controllers / supervisors / managers know what training opportunities and courses are available? | 1      |        |
|                                                          | Are they sent on courses regularly?                                                                         |        | 0      |
|                                                          | Are there specific criteria or formal rules to be qualified for training?                                   | 1      |        |
|                                                          | Are there specific promotion requirement protocols in place?                                                | 1      |        |
|                                                          | Are there career advancement opportunities?                                                                 | 1      |        |
| <b>Plant class</b>                                       | Is the plant classified by DWAF?                                                                            |        | 0      |
|                                                          | Has it been done according to the new classification system?                                                |        | 0      |
| <b>Working Conditions</b>                                | Are the responsibilities of process controllers, supervisors and plant managers in line with their salary?  |        | 0      |
|                                                          | What system is used for overtime management and payment?                                                    | 1      |        |
|                                                          | What is the WSA policy on conflict management (internal and external)?                                      | 1      |        |
|                                                          | <b>Is any medical assistance available for on the job injuries?</b>                                         | 1      |        |
|                                                          | Can all workers participate in medical schemes?                                                             | 1      |        |
|                                                          | Are the retirement/pension-aid benefits, the housing and travel allowance benefits available?               | 1      |        |
|                                                          | Are the leave benefits (vacation /study/ sick), and the bonus scheme available?                             | 1      |        |

|                                                          |                                                                                |              |  |
|----------------------------------------------------------|--------------------------------------------------------------------------------|--------------|--|
|                                                          | Are there any other incentives?                                                | 1            |  |
|                                                          | Are plant personnel satisfied with their working environment?                  | 1            |  |
|                                                          | Are the relationships between supervisors and their subordinates good or poor? | 1            |  |
|                                                          | Is there any performance indicators?                                           | 1            |  |
| <b>Maximum possible score for <i>Human Resources</i></b> |                                                                                | <b>27</b>    |  |
| <b>Total score attained for <i>Human Resources</i></b>   |                                                                                | <b>22</b>    |  |
| <b>Weight for <i>Human Resources</i></b>                 |                                                                                | <b>0.2</b>   |  |
| <b>Total weighted score for <i>Human Resources</i></b>   |                                                                                | <b>0.163</b> |  |

| NON-TECHNICAL COMPLIANCE (MANAGEMENT) SCORING: Table 1.5   |                                                                                                                                            |           |        |
|------------------------------------------------------------|--------------------------------------------------------------------------------------------------------------------------------------------|-----------|--------|
| Criterion                                                  |                                                                                                                                            | Yes =1    | No = 0 |
| 2. NON-TECHNICAL ASSESSMENT                                |                                                                                                                                            |           |        |
| 2D: Financial Systems                                      |                                                                                                                                            |           |        |
| Financial Systems Sharing in Place                         | Which financial systems are in place?                                                                                                      | 1         |        |
|                                                            | Are there sufficient funds for operation, maintenance and overtime?                                                                        |           | 0      |
|                                                            | Do the size of the plants (small versus large) influence the allocation of funds?                                                          | 1         |        |
|                                                            | Does the WSA's budgeting system work in relation to emergency funds, scheduled upgrading/extensions, unscheduled rehabilitation/upgrading? | 1         |        |
| Information Sharing in Place                               | Are there communication channels and transparency between the financial section and the water care section?                                | 1         |        |
|                                                            | Are regular meetings held? Who attends / chairs these meetings?                                                                            | 1         |        |
|                                                            | Are decisions taken at consensus / majority?                                                                                               | 1         |        |
|                                                            | Are reports freely available?                                                                                                              | 1         |        |
| Procurement System                                         | Is the procurement system transparent?                                                                                                     | 1         |        |
|                                                            | Is the procurement system open to all?                                                                                                     | 1         |        |
|                                                            | Is the water sector involved in the adjudication of tenders?                                                                               | 1         |        |
| <b>Maximum possible score for <i>Financial Systems</i></b> |                                                                                                                                            | <b>11</b> |        |

|                                                          |               |
|----------------------------------------------------------|---------------|
| <b>Total score attained for <i>Financial Systems</i></b> | <b>10</b>     |
| <b>Weight for <i>Financial Systems</i></b>               | <b>0.1</b>    |
| <b>Total weighted score for <i>Financial Systems</i></b> | <b>0.0091</b> |

| <b>NON-TECHNICAL COMPLIANCE (MANAGEMENT) SCORING: Table 1.6</b> |                                                                                                               |            |        |
|-----------------------------------------------------------------|---------------------------------------------------------------------------------------------------------------|------------|--------|
| Criterion                                                       |                                                                                                               | Yes =1     | No = 0 |
| <b>2. NON-TECHNICAL ASSESSMENT</b>                              |                                                                                                               |            |        |
| <b>2E: Communication Systems</b>                                |                                                                                                               |            |        |
| <b>Internal</b>                                                 | Are there sufficient internal communication channels in place, including the needs and shortcomings?          | <b>1</b>   |        |
|                                                                 | Are these communication channels effective?                                                                   | <b>1</b>   |        |
|                                                                 | Is the communication between supervisors and process controllers good or poor?                                | <b>1</b>   |        |
|                                                                 | Is there any interaction between the maintenance team and the rest of personnel in the water treatment plant? | <b>1</b>   |        |
|                                                                 | Is the communication between management and lower level process controllers good or poor?                     | <b>1</b>   |        |
| <b>External</b>                                                 | Are there sufficient communication channels with other Municipalities and/or Departments?                     | <b>1</b>   |        |
|                                                                 | Are there sufficient communication channels with consumers?                                                   | <b>1</b>   |        |
|                                                                 | Are these external communication channels effective, good or poor?                                            | <b>1</b>   |        |
| <b>Maximum possible score for <i>Communication Systems</i></b>  |                                                                                                               | <b>8</b>   |        |
| <b>Total score attained for <i>Communication Systems</i></b>    |                                                                                                               | <b>8</b>   |        |
| <b>Weight for <i>Communication Systems</i></b>                  |                                                                                                               | <b>0.2</b> |        |
| <b>Total weighted score for <i>Communication Systems</i></b>    |                                                                                                               | <b>0.2</b> |        |

| <b>NON-TECHNICAL COMPLIANCE (MANAGEMENT) SCORING: Table 1.7</b> |        |        |
|-----------------------------------------------------------------|--------|--------|
| Criterion                                                       | Yes =1 | No = 0 |

| 2. NON-TECHNICAL ASSESSMENT                           |                                                                                                                                                         |      |  |
|-------------------------------------------------------|---------------------------------------------------------------------------------------------------------------------------------------------------------|------|--|
| 2F: Audit of safety, health and environmental quality |                                                                                                                                                         |      |  |
| Safety Matters                                        | Are there water and safety management procedures for normal operation, incidents and emergency situations?                                              | 1    |  |
|                                                       | Is there any safety plan at water treatment plants including the safety of process controllers on duties?                                               | 1    |  |
|                                                       | Are there emergency plans in place for chlorine leaks?                                                                                                  | 1    |  |
|                                                       | Are there hazardous chemicals and ablution facilities, appropriate fire extinguishers location?                                                         | 1    |  |
|                                                       | Are safety meetings held regularly and who attends such meetings?                                                                                       | 1    |  |
| Health Aspects                                        | Are there representatives for health and safety of consumers? If yes, are they effective?                                                               | 1    |  |
|                                                       | Are there control measures that identify risks and ensure that health based-targets are met in terms of providing safe drinking water to all consumers? | 1    |  |
|                                                       | Are there emergency measures in place for water quality health impact?                                                                                  | 1    |  |
| Environmental Quality                                 | Are process controllers satisfied with their working environment?                                                                                       | 1    |  |
|                                                       | Is the working environment appropriate for improving or accelerating the service delivery?                                                              | 1    |  |
|                                                       | Is there any strategic plan to improve the quality of the working environment?                                                                          | 1    |  |
| Maximum possible score for SHEQ                       |                                                                                                                                                         | 11   |  |
| Total score attained for SHEQ                         |                                                                                                                                                         | 11   |  |
| Weight for SHEQ                                       |                                                                                                                                                         | 0.15 |  |
| Total weighted score for SHEQ                         |                                                                                                                                                         | 0.15 |  |

| NON-TECHNICAL COMPLIANCE (MANAGEMENT) SCORING: Table 1.8 |                                                                                                                        |        |        |
|----------------------------------------------------------|------------------------------------------------------------------------------------------------------------------------|--------|--------|
| Criterion                                                |                                                                                                                        | Yes =1 | No = 0 |
| 2. NON-TECHNICAL ASSESSMENT                              |                                                                                                                        |        |        |
| 2G: Community involvement and awareness                  |                                                                                                                        |        |        |
| Community Involvement                                    | Are there protocols involved communities in decision-making?                                                           |        | 0      |
|                                                          | Is there an effective reporting system for communities to assist in more rapid response to any water quality incident? |        | 0      |

|                                                         |                                                                                                                                                                 |       |   |
|---------------------------------------------------------|-----------------------------------------------------------------------------------------------------------------------------------------------------------------|-------|---|
|                                                         | Is there a Consumer Service to which non-compliance can be reported?                                                                                            |       | 0 |
| Community Awareness                                     | Is there a mechanism system to receive and actively address community complaints in a timely fashion?                                                           | 1     |   |
|                                                         | Are there procedures for promptly advising of any significant incidents within the drinking water supply including notification of the public health authority? | 1     |   |
|                                                         | Is there any water quality information system available to consumers through annual reports and in the internet?                                                | 1     |   |
| Maximum possible score for <i>Community Involvement</i> |                                                                                                                                                                 | 6     |   |
| Total score attained for <i>Community Involvement</i>   |                                                                                                                                                                 | 3     |   |
| Weight for <i>Community Involvement</i>                 |                                                                                                                                                                 | 0.05  |   |
| Total weighted score for <i>Community Involvement</i>   |                                                                                                                                                                 | 0.025 |   |

| TABLE 1.9                                                                 |                |
|---------------------------------------------------------------------------|----------------|
| NON-TECHNICAL (MANAGEMENT) COMPLIANCE SCORING:                            |                |
| Total Weighted Scoring for Malamulele treatment water plant <u>92.9 %</u> |                |
| Compliance Criterion                                                      | Weighted Score |
| <b>2. NON-TECHNICAL ASSESSMENT</b>                                        |                |
| 2A: Management Issues                                                     | 0.1            |
| 2B: Management Practices                                                  | 0.2            |
| 2C: Human Resources                                                       | 0.163          |
| 2D: Financial Systems                                                     | 0.091          |
| 2E: Communication Systems                                                 | 0.2            |
| 2F: Safety, Health and Environmental Quality                              | 0.15           |
| 2G: Community Involvement and Awareness                                   | 0.025          |
| <b>TOTAL WEIGHTED SCORE</b>                                               | <b>0.929</b>   |

| TABLE 1.10                                    |                            |
|-----------------------------------------------|----------------------------|
| NON-TECHNICAL (MANAGEMENT) COMPLIANCE RATING: |                            |
| Total Weighted Score                          | Rating Description         |
| 0 – 50                                        | <i>Class 3 Compliance:</i> |

|          |                                                                                      |
|----------|--------------------------------------------------------------------------------------|
|          | Total non-compliance; serious and immediate intervention required (TAC)              |
| 50 – 90  | <i>Class 2 Compliance:</i><br>Serious challenges requiring attention and improvement |
| 90 – 100 | <i>Class 1 Compliance:</i><br>Acceptable compliance                                  |

## VONDO TREATMENT PLANT

18 August 2009

| TABLE 2.1<br>NON-TECHNICAL (MANAGEMENT) COMPLIANCE SCORING |            |
|------------------------------------------------------------|------------|
| Criterion                                                  | Weight     |
| <b>2. NON-TECHNICAL ASSESSMENT</b>                         |            |
| 2A: Management Issues                                      | 0.1        |
| 2B: Management Practices                                   | 0.2        |
| 2C: Human Resources                                        | 0.2        |
| 2D: Financial Systems                                      | 0.1        |
| 2E: Communication Systems                                  | 0.2        |
| 2F: Safety, Health and Environmental Quality               | 0.15       |
| 2G: Community Involvement and Awareness                    | 0.05       |
| <b>TOTAL</b>                                               | <b>1.0</b> |

| NON-TECHNICAL COMPLIANCE (MANAGEMENT) SCORING: Table 2.2 |                                                                                  |        |       |
|----------------------------------------------------------|----------------------------------------------------------------------------------|--------|-------|
| Criterion                                                |                                                                                  | Yes =1 | No =0 |
| <b>2. NON-TECHNICAL ASSESSMENT</b>                       |                                                                                  |        |       |
| <b>2A: Management Issues</b>                             |                                                                                  |        |       |
| Assessment of strategic plans                            | Does a strategic plan for the assessment of drinking water supply systems exist? | 1      |       |
|                                                          | Are there preventive strategic plans for drinking water quality management?      | 1      |       |
|                                                          | Is there a strategic plan for recruitment of personnel per water treatment plant | 1      |       |



|                                                     |                                                                                                                                                                |     |  |
|-----------------------------------------------------|----------------------------------------------------------------------------------------------------------------------------------------------------------------|-----|--|
|                                                     | available?                                                                                                                                                     |     |  |
|                                                     | Is there a strategic plan for operational monitoring and verification of drinking water system?                                                                | 1   |  |
|                                                     | Is there a strategic plan for sharing and clarifying roles and responsibilities among all personnel involved in the production of safe drinking water quality? | 1   |  |
|                                                     | Does a strategic plan for training and development of water plant personnel, and for community involvement and awareness exist?                                | 1   |  |
|                                                     | Is there any funding strategic plan for implementation of drinking water quality management programmes?                                                        | 1   |  |
| Assm of tact plans                                  | Does a tactical plan for handling emergencies including communication of such emergencies to communities exist?                                                | 1   |  |
|                                                     | Is the overall periodic overseeing of water care function performed?                                                                                           | 1   |  |
|                                                     | Is there maintenance and asset management plans?                                                                                                               | 1   |  |
| Assessment of operational plans                     | Is the attendance of process controllers (and in particular shift workers) at the treatment plant monitored? Is there a clock-in-system for the attendance?    | 1   |  |
|                                                     | Is the superintendent available to operators on a day-to-day basis?                                                                                            | 1   |  |
|                                                     | Is there a substitute system plan put in place when one of the operators is ill or away attending a course?                                                    | 1   |  |
|                                                     | Are the supervisors and process controllers aware of their job requirements?<br>Are job descriptions available?                                                | 1   |  |
| Maximum possible score for <i>Management Issues</i> |                                                                                                                                                                | 14  |  |
| Total score attained for <i>Management Issues</i>   |                                                                                                                                                                | 14  |  |
| Weight for <i>Management Issues</i>                 |                                                                                                                                                                | 0.1 |  |
| Total weighted score for <i>Management Issues</i>   |                                                                                                                                                                | 0.1 |  |

| NON-TECHNICAL COMPLIANCE (MANAGEMENT) SCORING: Table 2.3 |                                                                                                                                                 |        |        |
|----------------------------------------------------------|-------------------------------------------------------------------------------------------------------------------------------------------------|--------|--------|
| Criterion                                                |                                                                                                                                                 | Yes =1 | No = 0 |
| <b>2. NON-TECHNICAL ASSESSMENT</b>                       |                                                                                                                                                 |        |        |
| <b>2B: Management Practices</b>                          |                                                                                                                                                 |        |        |
|                                                          | Do the WSPs use existing local (Emanti/DWAF) or international management practices? Are they implementing them in their water treatment plants? | 1      |        |
|                                                          | Are the WPSs able to understand the existing local or international practices and implementing them correctly?                                  | 1      |        |

|                                                               |                                                                                                        |            |  |
|---------------------------------------------------------------|--------------------------------------------------------------------------------------------------------|------------|--|
|                                                               | When local or international practices are not available, are the WSPs able to draw their own criteria? | 1          |  |
| <b>Maximum possible score for <i>Management Practices</i></b> |                                                                                                        | <b>3</b>   |  |
| <b>Total score attained for <i>Management Practices</i></b>   |                                                                                                        | <b>3</b>   |  |
| <b>Weight for <i>Management Practices</i></b>                 |                                                                                                        | <b>0.2</b> |  |
| <b>Total weighted score for <i>Management Practices</i></b>   |                                                                                                        | <b>0.2</b> |  |

| NON-TECHNICAL COMPLIANCE (MANAGEMENT) SCORING: Table 2.4 |                                                                                                             |        |        |
|----------------------------------------------------------|-------------------------------------------------------------------------------------------------------------|--------|--------|
| Criterion                                                |                                                                                                             | Yes =1 | No = 0 |
| <b>2. NON-TECHNICAL ASSESSMENT</b>                       |                                                                                                             |        |        |
| <b>2C: Human Resources</b>                               |                                                                                                             |        |        |
| <b>Personnel at the plant</b>                            | Is the number of personnel related to the size of the plant?                                                |        | 0      |
|                                                          | Are the needs of process controllers/supervisors and shift workers per plants adequate?                     |        | 0      |
|                                                          | Are there specific guidelines/rules for shift workers and their deployment?                                 | 1      |        |
|                                                          | How many operators are there in total? How many shift workers?                                              | 1      |        |
| <b>Qualifications of Personnel</b>                       | How many operators with qualifications in the DWAF categories?                                              | 1      |        |
|                                                          | Are personnel being correctly applied according to their qualifications?                                    | 1      |        |
|                                                          | Are there guidelines or formal rules for upgrading of qualifications?                                       | 1      |        |
| <b>Training Needs</b>                                    | Are there in service training programmes and policies? What is the in-service training policy of the WSA?   | 1      |        |
|                                                          | Do process controllers / supervisors / managers know what training opportunities and courses are available? | 1      |        |
|                                                          | Are they sent on courses regularly?                                                                         | 1      |        |
|                                                          | Are there specific criteria or formal rules to be qualified for training?                                   | 1      |        |
|                                                          | Are there specific promotion requirement protocols in place?                                                | 1      |        |
|                                                          | Are there career advancement opportunities?                                                                 | 1      |        |
| <b>Plant class</b>                                       | Is the plant classified by DWAF?                                                                            |        | 0      |
|                                                          | Has it been done according to the new classification system?                                                |        | 0      |
| <b>ng C on di</b>                                        | Are the responsibilities of process controllers, supervisors and plant managers in                          |        | 0      |

|                                                          |                                                                                               |              |  |
|----------------------------------------------------------|-----------------------------------------------------------------------------------------------|--------------|--|
|                                                          | line with their salary?                                                                       |              |  |
|                                                          | What system is used for overtime management and payment?                                      | 1            |  |
|                                                          | What is the WSA policy on conflict management (internal and external)?                        | 1            |  |
|                                                          | Is any medical assistance available for on the job injuries?                                  | 1            |  |
|                                                          | Can all workers participate in medical schemes?                                               | 1            |  |
|                                                          | Are the retirement/pension-aid benefits, the housing and travel allowance benefits available? | 1            |  |
|                                                          | Are the leave benefits (vacation /study/ sick), and the bonus scheme available?               | 1            |  |
|                                                          | Are there any other incentives?                                                               | 1            |  |
|                                                          | Are plant personnel satisfied with their working environment?                                 | 1            |  |
|                                                          | Are the relationships between supervisors and their subordinates good or poor?                | 1            |  |
|                                                          | Is there any performance indicators?                                                          | 1            |  |
| <b>Maximum possible score for <i>Human Resources</i></b> |                                                                                               | <b>27</b>    |  |
| <b>Total score attained for <i>Human Resources</i></b>   |                                                                                               | <b>22</b>    |  |
| <b>Weight for <i>Human Resources</i></b>                 |                                                                                               | <b>0.2</b>   |  |
| <b>Total weighted score for <i>Human Resources</i></b>   |                                                                                               | <b>0.163</b> |  |

| NON-TECHNICAL COMPLIANCE (MANAGEMENT) SCORING: Table 2.5 |                                                                                                                                            |        |        |
|----------------------------------------------------------|--------------------------------------------------------------------------------------------------------------------------------------------|--------|--------|
| Criterion                                                |                                                                                                                                            | Yes =1 | No = 0 |
| <b>2. NON-TECHNICAL ASSESSMENT</b>                       |                                                                                                                                            |        |        |
| <b>2D: Financial Systems</b>                             |                                                                                                                                            |        |        |
| <b>Financial Systems Sharing in Place</b>                | Which financial systems are in place?                                                                                                      | 1      |        |
|                                                          | Are there sufficient funds for operation, maintenance and overtime?                                                                        | 1      |        |
|                                                          | Do the size of the plants (small versus large) influence the allocation of funds?                                                          | 1      |        |
|                                                          | Does the WSA's budgeting system work in relation to emergency funds, scheduled upgrading/extensions, unscheduled rehabilitation/upgrading? | 1      |        |

|                                                            |                                                                                                             |            |  |
|------------------------------------------------------------|-------------------------------------------------------------------------------------------------------------|------------|--|
| <b>Information Sharing in Place</b>                        | Are there communication channels and transparency between the financial section and the water care section? | 1          |  |
|                                                            | Are regular meetings held? Who attends / chairs these meetings?                                             | 1          |  |
|                                                            | Are decisions taken at consensus / majority?                                                                | 1          |  |
|                                                            | Are reports freely available?                                                                               | 1          |  |
| <b>Procurement System</b>                                  | Is the procurement system transparent?                                                                      | 1          |  |
|                                                            | Is the procurement system open to all?                                                                      | 1          |  |
|                                                            | Is the water sector involved in the adjudication of tenders?                                                | 1          |  |
| <b>Maximum possible score for <i>Financial Systems</i></b> |                                                                                                             | <b>11</b>  |  |
| <b>Total score attained for <i>Financial Systems</i></b>   |                                                                                                             | <b>11</b>  |  |
| <b>Weight for <i>Financial Systems</i></b>                 |                                                                                                             | <b>0.1</b> |  |
| <b>Total weighted score for <i>Financial Systems</i></b>   |                                                                                                             | <b>0.1</b> |  |

| <b>NON-TECHNICAL COMPLIANCE (MANAGEMENT) SCORING: Table 2.6</b> |                                                                                                               |               |               |
|-----------------------------------------------------------------|---------------------------------------------------------------------------------------------------------------|---------------|---------------|
| <b>Criterion</b>                                                |                                                                                                               | <b>Yes =1</b> | <b>No = 0</b> |
| <b>2. NON-TECHNICAL ASSESSMENT</b>                              |                                                                                                               |               |               |
| <b>2E: Communication Systems</b>                                |                                                                                                               |               |               |
| <b>Internal</b>                                                 | Are there sufficient internal communication channels in place, including the needs and shortcomings?          | 1             |               |
|                                                                 | Are these communication channels effective?                                                                   | 1             |               |
|                                                                 | Is the communication between supervisors and process controllers good or poor?                                | 1             |               |
|                                                                 | Is there any interaction between the maintenance team and the rest of personnel in the water treatment plant? | 1             |               |
|                                                                 | Is the communication between management and lower level process controllers good or poor?                     | 1             |               |
| <b>External</b>                                                 | Are there sufficient communication channels with other Municipalities and/or Departments?                     | 1             |               |
|                                                                 | Are there sufficient communication channels with consumers?                                                   | 1             |               |

|                                                                |                                                                    |            |  |
|----------------------------------------------------------------|--------------------------------------------------------------------|------------|--|
|                                                                | Are these external communication channels effective, good or poor? | 1          |  |
| <b>Maximum possible score for <i>Communication Systems</i></b> |                                                                    | <b>8</b>   |  |
| <b>Total score attained for <i>Communication Systems</i></b>   |                                                                    | <b>8</b>   |  |
| <b>Weight for <i>Communication Systems</i></b>                 |                                                                    | <b>0.2</b> |  |
| <b>Total weighted score for <i>Communication Systems</i></b>   |                                                                    | <b>0.2</b> |  |

| NON-TECHNICAL COMPLIANCE (MANAGEMENT) SCORING: Table 2.7     |                                                                                                                                                         |              |        |
|--------------------------------------------------------------|---------------------------------------------------------------------------------------------------------------------------------------------------------|--------------|--------|
| Criterion                                                    |                                                                                                                                                         | Yes =1       | No = 0 |
| <b>2. NON-TECHNICAL ASSESSMENT</b>                           |                                                                                                                                                         |              |        |
| <b>2F: Audit of safety, health and environmental quality</b> |                                                                                                                                                         |              |        |
| Safety Matters                                               | Are there water and safety management procedures for normal operation, incidents and emergency situations?                                              | 1            |        |
|                                                              | Is there any safety plan at water treatment plants including the safety of process controllers on duties?                                               | 1            |        |
|                                                              | Are there emergency plans in place for chlorine leaks?                                                                                                  | 1            |        |
|                                                              | Are there hazardous chemicals and ablution facilities, appropriate fire extinguishers location?                                                         | 1            |        |
|                                                              | Are safety meetings held regularly and who attends such meetings?                                                                                       | 1            |        |
| Health Aspects                                               | Are there representatives for health and safety of consumers? If yes, are they effective?                                                               | 1            |        |
|                                                              | Are there control measures that identify risks and ensure that health based-targets are met in terms of providing safe drinking water to all consumers? | 1            |        |
|                                                              | Are there emergency measures in place for water quality health impact?                                                                                  | 1            |        |
| Environmental Quality                                        | Are process controllers satisfied with their working environment?                                                                                       | 1            |        |
|                                                              | Is the working environment appropriate for improving or accelerating the service delivery?                                                              | 1            |        |
|                                                              | Is there any strategic plan to improve the quality of the working environment?                                                                          |              | 0      |
| <b>Maximum possible score for <i>SHEQ</i></b>                |                                                                                                                                                         | <b>11</b>    |        |
| <b>Total score attained for <i>SHEQ</i></b>                  |                                                                                                                                                         | <b>10</b>    |        |
| <b>Weight for <i>SHEQ</i></b>                                |                                                                                                                                                         | <b>0.15</b>  |        |
| <b>Total weighted score for <i>SHEQ</i></b>                  |                                                                                                                                                         | <b>0.136</b> |        |

| NON-TECHNICAL COMPLIANCE (MANAGEMENT) SCORING: Table 2.8 |                                                                                                                                                                 |        |        |
|----------------------------------------------------------|-----------------------------------------------------------------------------------------------------------------------------------------------------------------|--------|--------|
| Criterion                                                |                                                                                                                                                                 | Yes =1 | No = 0 |
| <b>2. NON-TECHNICAL ASSESSMENT</b>                       |                                                                                                                                                                 |        |        |
| <b>2G: Community involvement and awareness</b>           |                                                                                                                                                                 |        |        |
| Community Involvement                                    | Are there protocols involved communities in decision-making?                                                                                                    | 1      |        |
|                                                          | Is there an effective reporting system for communities to assist in more rapid response to any water quality incident?                                          | 1      |        |
|                                                          | Is there a Consumer Service to which non-compliance can be reported?                                                                                            | 1      |        |
| Community Awareness                                      | Is there a mechanism system to receive and actively address community complaints in a timely fashion?                                                           | 1      |        |
|                                                          | Are there procedures for promptly advising of any significant incidents within the drinking water supply including notification of the public health authority? | 1      |        |
|                                                          | Is there any water quality information system available to consumers through annual reports and in the internet?                                                |        | 0      |
| Maximum possible score for <i>Community Involvement</i>  |                                                                                                                                                                 | 6      |        |
| Total score attained for <i>Community Involvement</i>    |                                                                                                                                                                 | 5      |        |
| Weight for <i>Community Involvement</i>                  |                                                                                                                                                                 | 0.05   |        |
| Total weighted score for <i>Community Involvement</i>    |                                                                                                                                                                 | 0.042  |        |

| TABLE 2.9                                                      |                |
|----------------------------------------------------------------|----------------|
| NON-TECHNICAL (MANAGEMENT) COMPLIANCE SCORING:                 |                |
| Total Weighted Scoring for Vondo treatment plant <u>94.1</u> % |                |
| Compliance Criterion                                           | Weighted Score |
| <b>2. NON-TECHNICAL ASSESSMENT</b>                             |                |
| <b>2A: Management Issues</b>                                   | <b>0.1</b>     |
| <b>2B: Management Practices</b>                                | <b>0.2</b>     |
| <b>2C: Human Resources</b>                                     | <b>0.163</b>   |
| <b>2D: Financial Systems</b>                                   | <b>0.1</b>     |
| <b>2E: Communication Systems</b>                               | <b>0.2</b>     |
| <b>2F: Safety, Health and Environmental Quality</b>            | <b>0.136</b>   |

|                                         |              |
|-----------------------------------------|--------------|
| 2G: Community Involvement and Awareness | 0.042        |
| <b>TOTAL WEIGHTED SCORE</b>             | <b>0.941</b> |

| TABLE 2.10<br>NON-TECHNICAL (MANAGEMENT) COMPLIANCE RATING: |                                                                                                       |
|-------------------------------------------------------------|-------------------------------------------------------------------------------------------------------|
| Total Weighted Score                                        | Rating Description                                                                                    |
| 0 – 50                                                      | <i>Class 3 Compliance:</i><br>Total non-compliance; serious and immediate intervention required (TAC) |
| 50 – 90                                                     | <i>Class 2 Compliance:</i><br>Serious challenges requiring attention and improvement                  |
| 90 – 100                                                    | <i>Class 1 Compliance:</i><br>Acceptable compliance                                                   |

#### MUTSHEDZI PLANT

19 August 2009

| TABLE 3.1<br>NON-TECHNICAL (MANAGEMENT) COMPLIANCE SCORING |            |
|------------------------------------------------------------|------------|
| Criterion                                                  | Weight     |
| <b>2. NON-TECHNICAL ASSESSMENT</b>                         |            |
| 2A: Management Issues                                      | 0.1        |
| 2B: Management Practices                                   | 0.2        |
| 2C: Human Resources                                        | 0.2        |
| 2D: Financial Systems                                      | 0.1        |
| 2E: Communication Systems                                  | 0.2        |
| 2F: Safety, Health and Environmental Quality               | 0.15       |
| 2G: Community Involvement and Awareness                    | 0.05       |
| <b>TOTAL</b>                                               | <b>1.0</b> |

| NON-TECHNICAL COMPLIANCE (MANAGEMENT) SCORING: Table 3.2 |                                                                                                                                                                |        |       |
|----------------------------------------------------------|----------------------------------------------------------------------------------------------------------------------------------------------------------------|--------|-------|
| Criterion                                                |                                                                                                                                                                | Yes =1 | No =0 |
| <b>2. NON-TECHNICAL ASSESSMENT</b>                       |                                                                                                                                                                |        |       |
| <b>2A: Management Issues</b>                             |                                                                                                                                                                |        |       |
| Assessment of strategic plans                            | Does a strategic plan for the assessment of drinking water supply systems exist?                                                                               | 1      |       |
|                                                          | Are there preventive strategic plans for drinking water quality management?                                                                                    | 1      |       |
|                                                          | Is there a strategic plan for recruitment of personnel per water treatment plant available?                                                                    | 1      |       |
|                                                          | Is there a strategic plan for operational monitoring and verification of drinking water system?                                                                | 1      |       |
|                                                          | Is there a strategic plan for sharing and clarifying roles and responsibilities among all personnel involved in the production of safe drinking water quality? | 1      |       |
|                                                          | Does a strategic plan for training and development of water plant personnel, and for community involvement and awareness exist?                                | 1      |       |
|                                                          | Is there any funding strategic plan for implementation of drinking water quality management programmes?                                                        | 1      |       |
| Assessment of tact plans                                 | Does a tactical plan for handling emergencies including communication of such emergencies to communities exist?                                                | 1      |       |
|                                                          | Is the overall periodic overseeing of water care function performed?                                                                                           | 1      |       |
|                                                          | Is there maintenance and asset management plans?                                                                                                               | 1      |       |
| Assessment of operational plans                          | Is the attendance of process controllers (and in particular shift workers) at the treatment plant monitored? Is there a clock-in-system for the attendance?    | 1      |       |
|                                                          | Is the superintendent available to operators on a day-to-day basis?                                                                                            | 1      |       |
|                                                          | Is there a substitute system plan put in place when one of the operators is ill or away attending a course?                                                    | 1      |       |
|                                                          | Are the supervisors and process controllers aware of their job requirements? Are job descriptions available?                                                   | 1      |       |
| Maximum possible score for <i>Management Issues</i>      |                                                                                                                                                                | 14     |       |
| Total score attained for <i>Management Issues</i>        |                                                                                                                                                                | 14     |       |
| Weight for <i>Management Issues</i>                      |                                                                                                                                                                | 0.1    |       |
| Total weighted score for <i>Management Issues</i>        |                                                                                                                                                                | 0.1    |       |



| NON-TECHNICAL COMPLIANCE (MANAGEMENT) SCORING: Table 3.3 |                                                                                                                                                 |            |        |
|----------------------------------------------------------|-------------------------------------------------------------------------------------------------------------------------------------------------|------------|--------|
| Criterion                                                |                                                                                                                                                 | Yes =1     | No = 0 |
| <b>2. NON-TECHNICAL ASSESSMENT</b>                       |                                                                                                                                                 |            |        |
| <b>2B: Management Practices</b>                          |                                                                                                                                                 |            |        |
|                                                          | Do the WSPs use existing local (Emanti/DWAF) or international management practices? Are they implementing them in their water treatment plants? | 1          |        |
|                                                          | Are the WPSs able to understand the existing local or international practices and implementing them correctly?                                  | 1          |        |
|                                                          | When local or international practices are not available, are the WSPs able to draw their own criteria?                                          | 1          |        |
| <b>Maximum possible score for Management Practices</b>   |                                                                                                                                                 | <b>3</b>   |        |
| <b>Total score attained for Management Practices</b>     |                                                                                                                                                 | <b>3</b>   |        |
| <b>Weight for Management Practices</b>                   |                                                                                                                                                 | <b>0.2</b> |        |
| <b>Total weighted score for Management Practices</b>     |                                                                                                                                                 | <b>0.2</b> |        |

| NON-TECHNICAL COMPLIANCE (MANAGEMENT) SCORING: Table 3.4 |                                                                                                           |        |        |
|----------------------------------------------------------|-----------------------------------------------------------------------------------------------------------|--------|--------|
| Criterion                                                |                                                                                                           | Yes =1 | No = 0 |
| <b>2. NON-TECHNICAL ASSESSMENT</b>                       |                                                                                                           |        |        |
| <b>2C: Human Resources</b>                               |                                                                                                           |        |        |
| Personnel at the plant                                   | Is the number of personnel related to the size of the plant?                                              |        | 0      |
|                                                          | Are the needs of process controllers/supervisors and shift workers per plants adequate?                   |        | 0      |
|                                                          | Are there specific guidelines/rules for shift workers and their deployment?                               | 1      |        |
|                                                          | How many operators are there in total? How many shift workers?                                            | 1      |        |
| Qualification of Personnel                               | How many operators with qualifications in the DWAF categories?                                            | 1      |        |
|                                                          | Are personnel being correctly applied according to their qualifications?                                  | 1      |        |
|                                                          | Are there guidelines or formal rules for upgrading of qualifications?                                     | 1      |        |
| Training Needs                                           | Are there in service training programmes and policies? What is the in-service training policy of the WSA? | 1      |        |

|                                                   |                                                                                                             |       |   |
|---------------------------------------------------|-------------------------------------------------------------------------------------------------------------|-------|---|
|                                                   | Do process controllers / supervisors / managers know what training opportunities and courses are available? | 1     |   |
|                                                   | Are they sent on courses regularly?                                                                         |       | 0 |
|                                                   | Are there specific criteria or formal rules to be qualified for training?                                   | 1     |   |
|                                                   | Are there specific promotion requirement protocols in place?                                                | 1     |   |
|                                                   | Are there career advancement opportunities?                                                                 | 1     |   |
| Plant class                                       | Is the plant classified by DWAF?                                                                            |       | 0 |
|                                                   | Has it been done according to the new classification system?                                                |       | 0 |
| Working Conditions                                | Are the responsibilities of process controllers, supervisors and plant managers in line with their salary?  |       | 0 |
|                                                   | What system is used for overtime management and payment?                                                    | 1     |   |
|                                                   | What is the WSA policy on conflict management (internal and external)?                                      | 1     |   |
|                                                   | Is any medical assistance available for on the job injuries?                                                | 1     |   |
|                                                   | Can all workers participate in medical schemes?                                                             | 1     |   |
|                                                   | Are the retirement/pension-aid benefits, the housing and travel allowance benefits available?               | 1     |   |
|                                                   | Are the leave benefits (vacation /study/ sick), and the bonus scheme available?                             | 1     |   |
|                                                   | Are there any other incentives?                                                                             | 1     |   |
|                                                   | Are plant personnel satisfied with their working environment?                                               | 1     |   |
|                                                   | Are the relationships between supervisors and their subordinates good or poor?                              | 1     |   |
|                                                   | Is there any performance indicators?                                                                        | 1     |   |
| Maximum possible score for <i>Human Resources</i> |                                                                                                             | 27    |   |
| Total score attained for <i>Human Resources</i>   |                                                                                                             | 21    |   |
| Weight for <i>Human Resources</i>                 |                                                                                                             | 0.2   |   |
| Total weighted score for <i>Human Resources</i>   |                                                                                                             | 0.156 |   |

| NON-TECHNICAL COMPLIANCE (MANAGEMENT) SCORING: Table 3.5 |        |        |
|----------------------------------------------------------|--------|--------|
| Criterion                                                | Yes =1 | No = 0 |
| 2. NON-TECHNICAL ASSESSMENT                              |        |        |

| 2D: Financial Systems                               |                                                                                                                                            |     |  |
|-----------------------------------------------------|--------------------------------------------------------------------------------------------------------------------------------------------|-----|--|
| Financial Systems Sharing in Place                  | Which financial systems are in place?                                                                                                      | 1   |  |
|                                                     | Are there sufficient funds for operation, maintenance and overtime?                                                                        | 1   |  |
|                                                     | Do the size of the plants (small versus large) influence the allocation of funds?                                                          | 1   |  |
|                                                     | Does the WSA's budgeting system work in relation to emergency funds, scheduled upgrading/extensions, unscheduled rehabilitation/upgrading? | 1   |  |
| Information Sharing in Place                        | Are there communication channels and transparency between the financial section and the water care section?                                | 1   |  |
|                                                     | Are regular meetings held? Who attends / chairs these meetings?                                                                            | 1   |  |
|                                                     | Are decisions taken at consensus / majority?                                                                                               | 1   |  |
|                                                     | Are reports freely available?                                                                                                              | 1   |  |
| Procurement System                                  | Is the procurement system transparent?                                                                                                     | 1   |  |
|                                                     | Is the procurement system open to all?                                                                                                     | 1   |  |
|                                                     | Is the water sector involved in the adjudication of tenders?                                                                               | 1   |  |
| Maximum possible score for <i>Financial Systems</i> |                                                                                                                                            | 11  |  |
| Total score attained for <i>Financial Systems</i>   |                                                                                                                                            | 11  |  |
| Weight for <i>Financial Systems</i>                 |                                                                                                                                            | 0.1 |  |
| Total weighted score for <i>Financial Systems</i>   |                                                                                                                                            | 0.1 |  |

| NON-TECHNICAL COMPLIANCE (MANAGEMENT) SCORING: Table 3.6 |                                                                                                      |        |        |
|----------------------------------------------------------|------------------------------------------------------------------------------------------------------|--------|--------|
| Criterion                                                |                                                                                                      | Yes =1 | No = 0 |
| 2. NON-TECHNICAL ASSESSMENT                              |                                                                                                      |        |        |
| 2E: Communication Systems                                |                                                                                                      |        |        |
| Internal                                                 | Are there sufficient internal communication channels in place, including the needs and shortcomings? | 1      |        |
|                                                          | Are these communication channels effective?                                                          | 1      |        |
|                                                          | Is the communication between supervisors and process controllers good or                             | 1      |        |

|                                                         |                                                                                                               |     |  |
|---------------------------------------------------------|---------------------------------------------------------------------------------------------------------------|-----|--|
|                                                         | poor?                                                                                                         |     |  |
|                                                         | Is there any interaction between the maintenance team and the rest of personnel in the water treatment plant? | 1   |  |
|                                                         | Is the communication between management and lower level process controllers good or poor?                     | 1   |  |
| External                                                | Are there sufficient communication channels with other Municipalities and/or Departments?                     | 1   |  |
|                                                         | Are there sufficient communication channels with consumers?                                                   | 1   |  |
|                                                         | Are these external communication channels effective, good or poor?                                            | 1   |  |
| Maximum possible score for <i>Communication Systems</i> |                                                                                                               | 8   |  |
| Total score attained for <i>Communication Systems</i>   |                                                                                                               | 8   |  |
| Weight for <i>Communication Systems</i>                 |                                                                                                               | 0.2 |  |
| Total weighted score for <i>Communication Systems</i>   |                                                                                                               | 0.2 |  |

| NON-TECHNICAL COMPLIANCE (MANAGEMENT) SCORING: Table 3.7     |                                                                                                                                                         |        |        |
|--------------------------------------------------------------|---------------------------------------------------------------------------------------------------------------------------------------------------------|--------|--------|
| Criterion                                                    |                                                                                                                                                         | Yes =1 | No = 0 |
| <b>2. NON-TECHNICAL ASSESSMENT</b>                           |                                                                                                                                                         |        |        |
| <b>2F: Audit of safety, health and environmental quality</b> |                                                                                                                                                         |        |        |
| Safety Matters                                               | Are there water and safety management procedures for normal operation, incidents and emergency situations?                                              | 1      |        |
|                                                              | Is there any safety plan at water treatment plants including the safety of process controllers on duties?                                               | 1      |        |
|                                                              | Are there emergency plans in place for chlorine leaks?                                                                                                  | 1      |        |
|                                                              | Are there hazardous chemicals and ablution facilities, appropriate fire extinguishers location?                                                         | 1      |        |
|                                                              | Are safety meetings held regularly and who attends such meetings?                                                                                       | 1      |        |
| Health Aspects                                               | Are there representatives for health and safety of consumers? If yes, are they effective?                                                               | 1      |        |
|                                                              | Are there control measures that identify risks and ensure that health based-targets are met in terms of providing safe drinking water to all consumers? | 1      |        |
|                                                              | Are there emergency measures in place for water quality health impact?                                                                                  | 1      |        |
| m<br>e<br>n<br>t<br>a<br>l                                   | Are process controllers satisfied with their working environment?                                                                                       | 1      |        |

|                                        |                                                                                            |             |  |
|----------------------------------------|--------------------------------------------------------------------------------------------|-------------|--|
|                                        | Is the working environment appropriate for improving or accelerating the service delivery? | 1           |  |
|                                        | Is there any strategic plan to improve the quality of the working environment?             | 1           |  |
| <b>Maximum possible score for SHEQ</b> |                                                                                            | <b>11</b>   |  |
| <b>Total score attained for SHEQ</b>   |                                                                                            | <b>11</b>   |  |
| <b>Weight for SHEQ</b>                 |                                                                                            | <b>0.15</b> |  |
| <b>Total weighted score for SHEQ</b>   |                                                                                            | <b>0.15</b> |  |

| NON-TECHNICAL COMPLIANCE (MANAGEMENT) SCORING: Table 3.8 |                                                                                                                                                                 |              |        |
|----------------------------------------------------------|-----------------------------------------------------------------------------------------------------------------------------------------------------------------|--------------|--------|
| Criterion                                                |                                                                                                                                                                 | Yes =1       | No = 0 |
| <b>2. NON-TECHNICAL ASSESSMENT</b>                       |                                                                                                                                                                 |              |        |
| <b>2G: Community involvement and awareness</b>           |                                                                                                                                                                 |              |        |
| <b>Community Involvement</b>                             | Are there protocols involved communities in decision-making?                                                                                                    |              | 0      |
|                                                          | Is there an effective reporting system for communities to assist in more rapid response to any water quality incident?                                          | 1            |        |
|                                                          | Is there a Consumer Service to which non-compliance can be reported?                                                                                            | 1            |        |
| <b>Community Awareness</b>                               | Is there a mechanism system to receive and actively address community complaints in a timely fashion?                                                           | 1            |        |
|                                                          | Are there procedures for promptly advising of any significant incidents within the drinking water supply including notification of the public health authority? | 1            |        |
|                                                          | Is there any water quality information system available to consumers through annual reports and in the internet?                                                | 1            |        |
| <b>Maximum possible score for Community Involvement</b>  |                                                                                                                                                                 | <b>6</b>     |        |
| <b>Total score attained for Community Involvement</b>    |                                                                                                                                                                 | <b>5</b>     |        |
| <b>Weight for Community Involvement</b>                  |                                                                                                                                                                 | <b>0.05</b>  |        |
| <b>Total weighted score for Community Involvement</b>    |                                                                                                                                                                 | <b>0.042</b> |        |

|                                                                  |  |
|------------------------------------------------------------------|--|
| TABLE 3.9                                                        |  |
| NON-TECHNICAL (MANAGEMENT) COMPLIANCE SCORING:                   |  |
| Total Weighted Scoring for Mutshedzi package plant <u>94.7 %</u> |  |

| Compliance Criterion                                | Weighted Score |
|-----------------------------------------------------|----------------|
| <b>2. NON-TECHNICAL ASSESSMENT</b>                  |                |
| <b>2A: Management Issues</b>                        | <b>0.1</b>     |
| <b>2B: Management Practices</b>                     | <b>0.2</b>     |
| <b>2C: Human Resources</b>                          | <b>0.156</b>   |
| <b>2D: Financial Systems</b>                        | <b>0.1</b>     |
| <b>2E: Communication Systems</b>                    | <b>0.2</b>     |
| <b>2F: Safety, Health and Environmental Quality</b> | <b>0.15</b>    |
| <b>2G: Community Involvement and Awareness</b>      | <b>0.042</b>   |
| <b>TOTAL WEIGHTED SCORE</b>                         | <b>0.947</b>   |

| <b>TABLE 3.10</b>                                    |                                                                                                       |
|------------------------------------------------------|-------------------------------------------------------------------------------------------------------|
| <b>NON-TECHNICAL (MANAGEMENT) COMPLIANCE RATING:</b> |                                                                                                       |
| <b>Total Weighted Score</b>                          | <b>Rating Description</b>                                                                             |
| <b>0 – 50</b>                                        | <i>Class 3 Compliance:</i><br>Total non-compliance; serious and immediate intervention required (TAC) |
| <b>50 – 90</b>                                       | <i>Class 2 Compliance:</i><br>Serious challenges requiring attention and improvement                  |
| <b>90 – 100</b>                                      | <i>Class 1 Compliance:</i><br>Acceptable compliance                                                   |

#### MUTALE REGIONAL WATER TREATMENT PLANT

19 August 2009

| <b>TABLE 4.1</b>                                     |               |
|------------------------------------------------------|---------------|
| <b>NON-TECHNICAL (MANAGEMENT) COMPLIANCE SCORING</b> |               |
| <b>Criterion</b>                                     | <b>Weight</b> |
| <b>2. NON-TECHNICAL ASSESSMENT</b>                   |               |
| <b>2A: Management Issues</b>                         | <b>0.1</b>    |

|       |                                          |      |
|-------|------------------------------------------|------|
| 2B:   | Management Practices                     | 0.2  |
| 2C:   | Human Resources                          | 0.2  |
| 2D:   | Financial Systems                        | 0.1  |
| 2E:   | Communication Systems                    | 0.2  |
| 2F:   | Safety, Health and Environmental Quality | 0.15 |
| 2G:   | Community Involvement and Awareness      | 0.05 |
| TOTAL |                                          | 1.0  |

| NON-TECHNICAL COMPLIANCE (MANAGEMENT) SCORING: Table 4.2 |                                                                                                                                                                |        |        |
|----------------------------------------------------------|----------------------------------------------------------------------------------------------------------------------------------------------------------------|--------|--------|
| Criterion                                                |                                                                                                                                                                | Yes =1 | No = 0 |
| <b>2. NON-TECHNICAL ASSESSMENT</b>                       |                                                                                                                                                                |        |        |
| <b>2A: Management Issues</b>                             |                                                                                                                                                                |        |        |
| Assessment of strategic plans                            | Does a strategic plan for the assessment of drinking water supply systems exist?                                                                               | 1      |        |
|                                                          | Are there preventive strategic plans for drinking water quality management?                                                                                    | 1      |        |
|                                                          | Is there a strategic plan for recruitment of personnel per water treatment plant available?                                                                    | 1      |        |
|                                                          | Is there a strategic plan for operational monitoring and verification of drinking water system?                                                                | 1      |        |
|                                                          | Is there a strategic plan for sharing and clarifying roles and responsibilities among all personnel involved in the production of safe drinking water quality? | 1      |        |
|                                                          | Does a strategic plan for training and development of water plant personnel, and for community involvement and awareness exist?                                | 1      |        |
|                                                          | Is there any funding strategic plan for implementation of drinking water quality management programmes?                                                        | 1      |        |
| Assessment of tactical plans                             | Does a tactical plan for handling emergencies including communication of such emergencies to communities exist?                                                | 1      |        |
|                                                          | Is the overall periodic overseeing of water care function performed?                                                                                           | 1      |        |
|                                                          | Is there maintenance and asset management plans?                                                                                                               | 1      |        |
| Assessment of operational plans                          | Is the attendance of process controllers (and in particular shift workers) at the treatment plant monitored? Is there a clock-in-system for the attendance?    | 1      |        |

|                                                            |                                                                                                              |            |  |
|------------------------------------------------------------|--------------------------------------------------------------------------------------------------------------|------------|--|
|                                                            | Is the superintendent available to operators on a day-to-day basis?                                          | 1          |  |
|                                                            | Is there a substitute system plan put in place when one of the operators is ill or away attending a course?  | 1          |  |
|                                                            | Are the supervisors and process controllers aware of their job requirements? Are job descriptions available? | 1          |  |
| <b>Maximum possible score for <i>Management Issues</i></b> |                                                                                                              | <b>14</b>  |  |
| <b>Total score attained for <i>Management Issues</i></b>   |                                                                                                              | <b>14</b>  |  |
| <b>Weight for <i>Management Issues</i></b>                 |                                                                                                              | <b>0.1</b> |  |
| <b>Total weighted score for <i>Management Issues</i></b>   |                                                                                                              | <b>0.1</b> |  |

| NON-TECHNICAL COMPLIANCE (MANAGEMENT) SCORING: Table 4.3      |                                                                                                                                                 |            |        |
|---------------------------------------------------------------|-------------------------------------------------------------------------------------------------------------------------------------------------|------------|--------|
| Criterion                                                     |                                                                                                                                                 | Yes =1     | No = 0 |
| <b>2. NON-TECHNICAL ASSESSMENT</b>                            |                                                                                                                                                 |            |        |
| <b>2B: Management Practices</b>                               |                                                                                                                                                 |            |        |
|                                                               | Do the WSPs use existing local (Emanti/DWAF) or international management practices? Are they implementing them in their water treatment plants? | 1          |        |
|                                                               | Are the WPSs able to understand the existing local or international practices and implementing them correctly?                                  | 1          |        |
|                                                               | When local or international practices are not available, are the WSPs able to draw their own criteria?                                          | 1          |        |
| <b>Maximum possible score for <i>Management Practices</i></b> |                                                                                                                                                 | <b>3</b>   |        |
| <b>Total score attained for <i>Management Practices</i></b>   |                                                                                                                                                 | <b>3</b>   |        |
| <b>Weight for <i>Management Practices</i></b>                 |                                                                                                                                                 | <b>0.2</b> |        |
| <b>Total weighted score for <i>Management Practices</i></b>   |                                                                                                                                                 | <b>0.2</b> |        |

| NON-TECHNICAL COMPLIANCE (MANAGEMENT) SCORING: Table 4.4 |        |        |
|----------------------------------------------------------|--------|--------|
| Criterion                                                | Yes =1 | No = 0 |
| <b>2. NON-TECHNICAL ASSESSMENT</b>                       |        |        |
| <b>2C: Human Resources</b>                               |        |        |



|                             |                                                                                                             |   |   |
|-----------------------------|-------------------------------------------------------------------------------------------------------------|---|---|
| Personnel at the plant      | Is the number of personnel related to the size of the plant?                                                |   | 0 |
|                             | Are the needs of process controllers/supervisors and shift workers per plants adequate?                     |   | 0 |
|                             | Are there specific guidelines/rules for shift workers and their deployment?                                 | 1 |   |
|                             | How many operators are there in total? How many shift workers?                                              | 1 |   |
| Qualifications of Personnel | How many operators with qualifications in the DWAF categories?                                              | 1 |   |
|                             | Are personnel being correctly applied according to their qualifications?                                    | 1 |   |
|                             | Are there guidelines or formal rules for upgrading of qualifications?                                       | 1 |   |
| Training Needs              | Are there in service training programmes and policies? What is the in-service training policy of the WSA?   | 1 |   |
|                             | Do process controllers / supervisors / managers know what training opportunities and courses are available? | 1 |   |
|                             | Are they sent on courses regularly?                                                                         |   | 0 |
|                             | Are there specific criteria or formal rules to be qualified for training?                                   |   | 0 |
|                             | Are there specific promotion requirement protocols in place?                                                | 1 |   |
|                             | Are there career advancement opportunities?                                                                 | 1 |   |
| Plant class                 | Is the plant classified by DWAF?                                                                            |   | 0 |
|                             | Has it been done according to the new classification system?                                                |   | 0 |
| Working Conditions          | Are the responsibilities of process controllers, supervisors and plant managers in line with their salary?  |   | 0 |
|                             | What system is used for overtime management and payment?                                                    | 1 |   |
|                             | What is the WSA policy on conflict management (internal and external)?                                      | 1 |   |
|                             | Is any medical assistance available for on the job injuries?                                                | 1 |   |
|                             | Can all workers participate in medical schemes?                                                             | 1 |   |
|                             | Are the retirement/pension-aid benefits, the housing and travel allowance benefits available?               | 1 |   |
|                             | Are the leave benefits (vacation /study/ sick), and the bonus scheme available?                             | 1 |   |
|                             | Are there any other incentives?                                                                             | 1 |   |
|                             | Are plant personnel satisfied with their working environment?                                               | 1 |   |
|                             | Are the relationships between supervisors and their subordinates good or poor?                              | 1 |   |

|                                                          |                                      |              |  |
|----------------------------------------------------------|--------------------------------------|--------------|--|
|                                                          | Is there any performance indicators? | 1            |  |
| <b>Maximum possible score for <i>Human Resources</i></b> |                                      | <b>26</b>    |  |
| <b>Total score attained for <i>Human Resources</i></b>   |                                      | <b>19</b>    |  |
| <b>Weight for <i>Human Resources</i></b>                 |                                      | <b>0.2</b>   |  |
| <b>Total weighted score for <i>Human Resources</i></b>   |                                      | <b>0.146</b> |  |

| NON-TECHNICAL COMPLIANCE (MANAGEMENT) SCORING: Table 4.5   |                                                                                                                                            |            |        |
|------------------------------------------------------------|--------------------------------------------------------------------------------------------------------------------------------------------|------------|--------|
| Criterion                                                  |                                                                                                                                            | Yes =1     | No = 0 |
| <b>2. NON-TECHNICAL ASSESSMENT</b>                         |                                                                                                                                            |            |        |
| <b>2D: Financial Systems</b>                               |                                                                                                                                            |            |        |
| <b>Financial Systems Sharing in Place</b>                  | Which financial systems are in place?                                                                                                      | 1          |        |
|                                                            | Are there sufficient funds for operation, maintenance and overtime?                                                                        | 1          |        |
|                                                            | Do the size of the plants (small versus large) influence the allocation of funds?                                                          | 1          |        |
|                                                            | Does the WSA's budgeting system work in relation to emergency funds, scheduled upgrading/extensions, unscheduled rehabilitation/upgrading? | 1          |        |
| <b>Information Sharing in Place</b>                        | Are there communication channels and transparency between the financial section and the water care section?                                | 1          |        |
|                                                            | Are regular meetings held? Who attends / chairs these meetings?                                                                            | 1          |        |
|                                                            | Are decisions taken at consensus / majority?                                                                                               | 1          |        |
|                                                            | Are reports freely available?                                                                                                              | 1          |        |
| <b>Procurement System</b>                                  | Is the procurement system transparent?                                                                                                     | 1          |        |
|                                                            | Is the procurement system open to all?                                                                                                     | 1          |        |
|                                                            | Is the water sector involved in the adjudication of tenders?                                                                               | 1          |        |
| <b>Maximum possible score for <i>Financial Systems</i></b> |                                                                                                                                            | <b>11</b>  |        |
| <b>Total score attained for <i>Financial Systems</i></b>   |                                                                                                                                            | <b>11</b>  |        |
| <b>Weight for <i>Financial Systems</i></b>                 |                                                                                                                                            | <b>0.1</b> |        |

|                                                   |     |
|---------------------------------------------------|-----|
| Total weighted score for <i>Financial Systems</i> | 0.1 |
|---------------------------------------------------|-----|

| NON-TECHNICAL COMPLIANCE (MANAGEMENT) SCORING: Table 4.6       |                                                                                                               |            |        |
|----------------------------------------------------------------|---------------------------------------------------------------------------------------------------------------|------------|--------|
| Criterion                                                      |                                                                                                               | Yes =1     | No = 0 |
| <b>2. NON-TECHNICAL ASSESSMENT</b>                             |                                                                                                               |            |        |
| <b>2E: Communication Systems</b>                               |                                                                                                               |            |        |
| <b>Internal</b>                                                | Are there sufficient internal communication channels in place, including the needs and shortcomings?          | 1          |        |
|                                                                | Are these communication channels effective?                                                                   | 1          |        |
|                                                                | Is the communication between supervisors and process controllers good or poor?                                | 1          |        |
|                                                                | Is there any interaction between the maintenance team and the rest of personnel in the water treatment plant? | 1          |        |
|                                                                | Is the communication between management and lower level process controllers good or poor?                     | 1          |        |
| <b>External</b>                                                | Are there sufficient communication channels with other Municipalities and/or Departments?                     | 1          |        |
|                                                                | Are there sufficient communication channels with consumers?                                                   | 1          |        |
|                                                                | Are these external communication channels effective, good or poor?                                            | 1          |        |
| <b>Maximum possible score for <i>Communication Systems</i></b> |                                                                                                               | <b>8</b>   |        |
| <b>Total score attained for <i>Communication Systems</i></b>   |                                                                                                               | <b>8</b>   |        |
| <b>Weight for <i>Communication Systems</i></b>                 |                                                                                                               | <b>0.2</b> |        |
| <b>Total weighted score for <i>Communication Systems</i></b>   |                                                                                                               | <b>0.2</b> |        |

| NON-TECHNICAL COMPLIANCE (MANAGEMENT) SCORING: Table 4.7     |                                                                                                            |        |        |
|--------------------------------------------------------------|------------------------------------------------------------------------------------------------------------|--------|--------|
| Criterion                                                    |                                                                                                            | Yes =1 | No = 0 |
| <b>2. NON-TECHNICAL ASSESSMENT</b>                           |                                                                                                            |        |        |
| <b>2F: Audit of safety, health and environmental quality</b> |                                                                                                            |        |        |
| <b>Water Safety</b>                                          | Are there water and safety management procedures for normal operation, incidents and emergency situations? | 1      |        |

|                                 |                                                                                                                                                         |      |  |
|---------------------------------|---------------------------------------------------------------------------------------------------------------------------------------------------------|------|--|
|                                 | Is there any safety plan at water treatment plants including the safety of process controllers on duties?                                               | 1    |  |
|                                 | Are there emergency plans in place for chlorine leaks?                                                                                                  | 1    |  |
|                                 | Are there hazardous chemicals and ablution facilities, appropriate fire extinguishers location?                                                         | 1    |  |
|                                 | Are safety meetings held regularly and who attends such meetings?                                                                                       | 1    |  |
| Health Aspects                  | Are there representatives for health and safety of consumers? If yes, are they effective?                                                               | 1    |  |
|                                 | Are there control measures that identify risks and ensure that health based-targets are met in terms of providing safe drinking water to all consumers? | 1    |  |
|                                 | Are there emergency measures in place for water quality health impact?                                                                                  | 1    |  |
| Environmental Quality           | Are process controllers satisfied with their working environment?                                                                                       | 1    |  |
|                                 | Is the working environment appropriate for improving or accelerating the service delivery?                                                              | 1    |  |
|                                 | Is there any strategic plan to improve the quality of the working environment?                                                                          | 1    |  |
| Maximum possible score for SHEQ |                                                                                                                                                         | 11   |  |
| Total score attained for SHEQ   |                                                                                                                                                         | 11   |  |
| Weight for SHEQ                 |                                                                                                                                                         | 0.15 |  |
| Total weighted score for SHEQ   |                                                                                                                                                         | 0.15 |  |

| NON-TECHNICAL COMPLIANCE (MANAGEMENT) SCORING: Table 4.8 |                                                                                                                                                      |        |        |
|----------------------------------------------------------|------------------------------------------------------------------------------------------------------------------------------------------------------|--------|--------|
| Criterion                                                |                                                                                                                                                      | Yes =1 | No = 0 |
| <b>2. NON-TECHNICAL ASSESSMENT</b>                       |                                                                                                                                                      |        |        |
| <b>2G: Community involvement and awareness</b>           |                                                                                                                                                      |        |        |
| Community Involvement                                    | Are there protocols involved communities in decision-making?                                                                                         |        | 0      |
|                                                          | Is there an effective reporting system for communities to assist in more rapid response to any water quality incident?                               |        | 0      |
|                                                          | Is there a Consumer Service to which non-compliance can be reported?                                                                                 | 1      |        |
| Community Awareness                                      | Is there a mechanism system to receive and actively address community complaints in a timely fashion?                                                | 1      |        |
|                                                          | Are there procedures for promptly advising of any significant incidents within the drinking water supply including notification of the public health | 1      |        |

|                                                                |                                                                                                                  |              |  |
|----------------------------------------------------------------|------------------------------------------------------------------------------------------------------------------|--------------|--|
|                                                                | authority?                                                                                                       |              |  |
|                                                                | Is there any water quality information system available to consumers through annual reports and in the internet? | 1            |  |
| <b>Maximum possible score for <i>Community Involvement</i></b> |                                                                                                                  | <b>6</b>     |  |
| <b>Total score attained for <i>Community Involvement</i></b>   |                                                                                                                  | <b>4</b>     |  |
| <b>Weight for <i>Community Involvement</i></b>                 |                                                                                                                  | <b>0.05</b>  |  |
| <b>Total weighted score for <i>Community Involvement</i></b>   |                                                                                                                  | <b>0.033</b> |  |

| TABLE 4.90                                                                     |                |
|--------------------------------------------------------------------------------|----------------|
| NON-TECHNICAL (MANAGEMENT) COMPLIANCE SCORING:                                 |                |
| Total Weighted Scoring for Mutale Regional water treatment plant <u>92.9 %</u> |                |
| Compliance Criterion                                                           | Weighted Score |
| <b>2. NON-TECHNICAL ASSESSMENT</b>                                             |                |
| <b>2A: Management Issues</b>                                                   | <b>0.1</b>     |
| <b>2B: Management Practices</b>                                                | <b>0.2</b>     |
| <b>2C: Human Resources</b>                                                     | <b>0.146</b>   |
| <b>2D: Financial Systems</b>                                                   | <b>0.1</b>     |
| <b>2E: Communication Systems</b>                                               | <b>0.2</b>     |
| <b>2F: Safety, Health and Environmental Quality</b>                            | <b>0.15</b>    |
| <b>2G: Community Involvement and Awareness</b>                                 | <b>0.033</b>   |
| <b>TOTAL WEIGHTED SCORE</b>                                                    | <b>0.929</b>   |

| TABLE 4.10                                    |                                                                                                       |
|-----------------------------------------------|-------------------------------------------------------------------------------------------------------|
| NON-TECHNICAL (MANAGEMENT) COMPLIANCE RATING: |                                                                                                       |
| Total Weighted Score                          | Rating Description                                                                                    |
| <b>0 – 50</b>                                 | <i>Class 3 Compliance:</i><br>Total non-compliance; serious and immediate intervention required (TAC) |
| <b>50 – 90</b>                                | <i>Class 2 Compliance:</i><br>Serious challenges requiring attention and improvement                  |
| <b>90 – 100</b>                               | <i>Class 1 Compliance:</i>                                                                            |

|  |                       |
|--|-----------------------|
|  | Acceptable compliance |
|--|-----------------------|

# TSHEDZA PACKAGE PLANT

19 August 2009

| TABLE 5.1<br>NON-TECHNICAL (MANAGEMENT) COMPLIANCE SCORING |             |
|------------------------------------------------------------|-------------|
| Criterion                                                  | Weight      |
| <b>2. NON-TECHNICAL ASSESSMENT</b>                         |             |
| <b>2A: Management Issues</b>                               | <b>0.1</b>  |
| <b>2B: Management Practices</b>                            | <b>0.2</b>  |
| <b>2C: Human Resources</b>                                 | <b>0.2</b>  |
| <b>2D: Financial Systems</b>                               | <b>0.1</b>  |
| <b>2E: Communication Systems</b>                           | <b>0.2</b>  |
| <b>2F: Safety, Health and Environmental Quality</b>        | <b>0.15</b> |
| <b>2G: Community Involvement and Awareness</b>             | <b>0.05</b> |
| <b>TOTAL</b>                                               | <b>1.0</b>  |

| NON-TECHNICAL COMPLIANCE (MANAGEMENT) SCORING: Table 5.2 |                                                                                                                                                                |          |       |
|----------------------------------------------------------|----------------------------------------------------------------------------------------------------------------------------------------------------------------|----------|-------|
| Criterion                                                |                                                                                                                                                                | Yes =1   | No =0 |
| <b>2. NON-TECHNICAL ASSESSMENT</b>                       |                                                                                                                                                                |          |       |
| <b>2A: Management Issues</b>                             |                                                                                                                                                                |          |       |
| <b>Assessment of strategic plans</b>                     | Does a strategic plan for the assessment of drinking water supply systems exist?                                                                               | <b>1</b> |       |
|                                                          | Are there preventive strategic plans for drinking water quality management?                                                                                    | <b>1</b> |       |
|                                                          | Is there a strategic plan for recruitment of personnel per water treatment plant available?                                                                    | <b>1</b> |       |
|                                                          | Is there a strategic plan for operational monitoring and verification of drinking water system?                                                                | <b>1</b> |       |
|                                                          | Is there a strategic plan for sharing and clarifying roles and responsibilities among all personnel involved in the production of safe drinking water quality? | <b>1</b> |       |

|                                                     |                                                                                                                                                             |     |   |
|-----------------------------------------------------|-------------------------------------------------------------------------------------------------------------------------------------------------------------|-----|---|
|                                                     | Does a strategic plan for training and development of water plant personnel, and for community involvement and awareness exist?                             | 1   |   |
|                                                     | Is there any funding strategic plan for implementation of drinking water quality management programmes?                                                     | 1   |   |
| Assessment of tactical plans                        | Does a tactical plan for handling emergencies including communication of such emergencies to communities exist?                                             | 1   |   |
|                                                     | Is the overall periodic overseeing of water care function performed?                                                                                        | 1   |   |
|                                                     | Is there maintenance and asset management plans?                                                                                                            |     | 0 |
| Assessment of operational plans                     | Is the attendance of process controllers (and in particular shift workers) at the treatment plant monitored? Is there a clock-in-system for the attendance? | 1   |   |
|                                                     | Is the superintendent available to operators on a day-to-day basis?                                                                                         | 1   |   |
|                                                     | Is there a substitute system plan put in place when one of the operators is ill or away attending a course?                                                 | 1   |   |
|                                                     | Are the supervisors and process controllers aware of their job requirements? Are job descriptions available?                                                | 1   |   |
| Maximum possible score for <i>Management Issues</i> |                                                                                                                                                             | 14  |   |
| Total score attained for <i>Management Issues</i>   |                                                                                                                                                             | 13  |   |
| Weight for <i>Management Issues</i>                 |                                                                                                                                                             | 0.1 |   |
| Total weighted score for <i>Management Issues</i>   |                                                                                                                                                             |     |   |

| NON-TECHNICAL COMPLIANCE (MANAGEMENT) SCORING: Table 5.3 |                                                                                                                                                 |        |        |
|----------------------------------------------------------|-------------------------------------------------------------------------------------------------------------------------------------------------|--------|--------|
| Criterion                                                |                                                                                                                                                 | Yes =1 | No = 0 |
| <b>2. NON-TECHNICAL ASSESSMENT</b>                       |                                                                                                                                                 |        |        |
| <b>2B: Management Practices</b>                          |                                                                                                                                                 |        |        |
|                                                          | Do the WSPs use existing local (Emanti/DWAF) or international management practices? Are they implementing them in their water treatment plants? | 1      |        |
|                                                          | Are the WSPs able to understand the existing local or international practices and implementing them correctly?                                  | 1      |        |
|                                                          | When local or international practices are not available, are the WSPs able to draw their own criteria?                                          | 1      |        |
| Maximum possible score for <i>Management Practices</i>   |                                                                                                                                                 | 3      |        |

|                                                      |     |
|------------------------------------------------------|-----|
| Total score attained for <i>Management Practices</i> | 3   |
| Weight for <i>Management Practices</i>               | 0.2 |
| Total weighted score for <i>Management Practices</i> |     |

| NON-TECHNICAL COMPLIANCE (MANAGEMENT) SCORING: Table 5.4 |                                                                                                             |           |        |
|----------------------------------------------------------|-------------------------------------------------------------------------------------------------------------|-----------|--------|
| Criterion                                                |                                                                                                             | Yes<br>=1 | No = 0 |
| <b>2. NON-TECHNICAL ASSESSMENT</b>                       |                                                                                                             |           |        |
| <b>2C: Human Resources</b>                               |                                                                                                             |           |        |
| Personnel at the plant                                   | Is the number of personnel related to the size of the plant?                                                |           | 0      |
|                                                          | Are the needs of process controllers/supervisors and shift workers per plants adequate?                     |           | 0      |
|                                                          | Are there specific guidelines/rules for shift workers and their deployment?                                 |           | 0      |
|                                                          | How many operators are there in total? How many shift workers?                                              | 1         |        |
| Qualifications of Personnel                              | How many operators with qualifications in the DWAF categories?                                              | 1         |        |
|                                                          | Are personnel being correctly applied according to their qualifications?                                    | 1         |        |
|                                                          | Are there guidelines or formal rules for upgrading of qualifications?                                       | 1         |        |
| Training Needs                                           | Are there in service training programmes and policies? What is the in-service training policy of the WSA?   | 1         |        |
|                                                          | Do process controllers / supervisors / managers know what training opportunities and courses are available? | 1         |        |
|                                                          | Are they sent on courses regularly?                                                                         | 1         |        |
|                                                          | Are there specific criteria or formal rules to be qualified for training?                                   | 1         |        |
|                                                          | Are there specific promotion requirement protocols in place?                                                | 1         |        |
|                                                          | Are there career advancement opportunities?                                                                 | 1         |        |
| Plant class                                              | Is the plant classified by DWAF?                                                                            |           | 0      |
|                                                          | Has it been done according to the new classification system?                                                |           | 0      |
| Working Conditions                                       | Are the responsibilities of process controllers, supervisors and plant managers in line with their salary?  |           | 0      |
|                                                          | What system is used for overtime management and payment?                                                    | 1         |        |
|                                                          | What is the WSA policy on conflict management (internal and external)?                                      | 1         |        |



|                                                          |                                                                                               |            |  |
|----------------------------------------------------------|-----------------------------------------------------------------------------------------------|------------|--|
|                                                          | Is any medical assistance available for on the job injuries?                                  | 1          |  |
|                                                          | Can all workers participate in medical schemes?                                               | 1          |  |
|                                                          | Are the retirement/pension-aid benefits, the housing and travel allowance benefits available? | 1          |  |
|                                                          | Are the leave benefits (vacation /study/ sick), and the bonus scheme available?               | 1          |  |
|                                                          | Are there any other incentives?                                                               | 1          |  |
|                                                          | Are plant personnel satisfied with their working environment?                                 | 1          |  |
|                                                          | Are the relationships between supervisors and their subordinates good or poor?                | 1          |  |
|                                                          | Is there any performance indicators?                                                          | 1          |  |
| <b>Maximum possible score for <i>Human Resources</i></b> |                                                                                               | <b>27</b>  |  |
| <b>Total score attained for <i>Human Resources</i></b>   |                                                                                               | <b>21</b>  |  |
| <b>Weight for <i>Human Resources</i></b>                 |                                                                                               | <b>0.2</b> |  |
| <b>Total weighted score for <i>Human Resources</i></b>   |                                                                                               |            |  |

| NON-TECHNICAL COMPLIANCE (MANAGEMENT) SCORING: Table 5.5 |                                                                                                                                            |        |        |
|----------------------------------------------------------|--------------------------------------------------------------------------------------------------------------------------------------------|--------|--------|
| Criterion                                                |                                                                                                                                            | Yes =1 | No = 0 |
| <b>2. NON-TECHNICAL ASSESSMENT</b>                       |                                                                                                                                            |        |        |
| <b>2D: Financial Systems</b>                             |                                                                                                                                            |        |        |
| Financial Systems Sharing in Place                       | Which financial systems are in place?                                                                                                      | 1      |        |
|                                                          | Are there sufficient funds for operation, maintenance and overtime?                                                                        | 1      |        |
|                                                          | Do the size of the plants (small versus large) influence the allocation of funds?                                                          | 1      |        |
|                                                          | Does the WSA's budgeting system work in relation to emergency funds, scheduled upgrading/extensions, unscheduled rehabilitation/upgrading? | 1      |        |
| Information Sharing in Place                             | Are there communication channels and transparency between the financial section and the water care section?                                | 1      |        |
|                                                          | Are regular meetings held? Who attends / chairs these meetings?                                                                            | 1      |        |
|                                                          | Are decisions taken at consensus / majority?                                                                                               | 1      |        |
|                                                          | Are reports freely available?                                                                                                              | 1      |        |
| ment                                                     | Is the procurement system transparent?                                                                                                     | 1      |        |

|                                                            |                                                              |            |  |
|------------------------------------------------------------|--------------------------------------------------------------|------------|--|
|                                                            | Is the procurement system open to all?                       | 1          |  |
|                                                            | Is the water sector involved in the adjudication of tenders? | 1          |  |
| <b>Maximum possible score for <i>Financial Systems</i></b> |                                                              | <b>11</b>  |  |
| <b>Total score attained for <i>Financial Systems</i></b>   |                                                              | <b>11</b>  |  |
| <b>Weight for <i>Financial Systems</i></b>                 |                                                              | <b>0.1</b> |  |
| <b>Total weighted score for <i>Financial Systems</i></b>   |                                                              |            |  |

| NON-TECHNICAL COMPLIANCE (MANAGEMENT) SCORING: Table 5.6       |                                                                                                               |            |        |
|----------------------------------------------------------------|---------------------------------------------------------------------------------------------------------------|------------|--------|
| Criterion                                                      |                                                                                                               | Yes =1     | No = 0 |
| <b>2. NON-TECHNICAL ASSESSMENT</b>                             |                                                                                                               |            |        |
| <b>2E: Communication Systems</b>                               |                                                                                                               |            |        |
| <b>Internal</b>                                                | Are there sufficient internal communication channels in place, including the needs and shortcomings?          | 1          |        |
|                                                                | Are these communication channels effective?                                                                   | 1          |        |
|                                                                | Is the communication between supervisors and process controllers good or poor?                                | 1          |        |
|                                                                | Is there any interaction between the maintenance team and the rest of personnel in the water treatment plant? | 1          |        |
|                                                                | Is the communication between management and lower level process controllers good or poor?                     | 1          |        |
| <b>External</b>                                                | Are there sufficient communication channels with other Municipalities and/or Departments?                     | 1          |        |
|                                                                | Are there sufficient communication channels with consumers?                                                   | 1          |        |
|                                                                | Are these external communication channels effective, good or poor?                                            | 1          |        |
| <b>Maximum possible score for <i>Communication Systems</i></b> |                                                                                                               | <b>8</b>   |        |
| <b>Total score attained for <i>Communication Systems</i></b>   |                                                                                                               | <b>8</b>   |        |
| <b>Weight for <i>Communication Systems</i></b>                 |                                                                                                               | <b>0.2</b> |        |
| <b>Total weighted score for <i>Communication Systems</i></b>   |                                                                                                               |            |        |

| NON-TECHNICAL COMPLIANCE (MANAGEMENT) SCORING: Table 5.7     |                                                                                                                                                         |        |        |
|--------------------------------------------------------------|---------------------------------------------------------------------------------------------------------------------------------------------------------|--------|--------|
| Criterion                                                    |                                                                                                                                                         | Yes =1 | No = 0 |
| <b>2. NON-TECHNICAL ASSESSMENT</b>                           |                                                                                                                                                         |        |        |
| <b>2F: Audit of safety, health and environmental quality</b> |                                                                                                                                                         |        |        |
| Safety Matters                                               | Are there water and safety management procedures for normal operation, incidents and emergency situations?                                              | 1      |        |
|                                                              | Is there any safety plan at water treatment plants including the safety of process controllers on duties?                                               | 1      |        |
|                                                              | Are there emergency plans in place for chlorine leaks?                                                                                                  | 1      |        |
|                                                              | Are there hazardous chemicals and ablution facilities, appropriate fire extinguishers location?                                                         | 1      |        |
|                                                              | Are safety meetings held regularly and who attends such meetings?                                                                                       | 1      |        |
| Health Aspects                                               | Are there representatives for health and safety of consumers? If yes, are they effective?                                                               | 1      |        |
|                                                              | Are there control measures that identify risks and ensure that health based-targets are met in terms of providing safe drinking water to all consumers? | 1      |        |
|                                                              | Are there emergency measures in place for water quality health impact?                                                                                  | 1      |        |
| Environmental Quality                                        | Are process controllers satisfied with their working environment?                                                                                       | 1      |        |
|                                                              | Is the working environment appropriate for improving or accelerating the service delivery?                                                              | 1      |        |
|                                                              | Is there any strategic plan to improve the quality of the working environment?                                                                          | 1      |        |
| Maximum possible score for <i>SHEQ</i>                       |                                                                                                                                                         | 11     |        |
| Total score attained for <i>SHEQ</i>                         |                                                                                                                                                         | 11     |        |
| Weight for <i>SHEQ</i>                                       |                                                                                                                                                         | 0.15   |        |
| Total weighted score for <i>SHEQ</i>                         |                                                                                                                                                         |        |        |

| NON-TECHNICAL COMPLIANCE (MANAGEMENT) SCORING: Table 5.8 |        |        |
|----------------------------------------------------------|--------|--------|
| Criterion                                                | Yes =1 | No = 0 |
| <b>2. NON-TECHNICAL ASSESSMENT</b>                       |        |        |
| <b>2G: Community involvement and awareness</b>           |        |        |

|                                                         |                                                                                                                                                                 |      |   |
|---------------------------------------------------------|-----------------------------------------------------------------------------------------------------------------------------------------------------------------|------|---|
| Community Involvement                                   | Are there protocols involved communities in decision-making?                                                                                                    |      | 0 |
|                                                         | Is there an effective reporting system for communities to assist in more rapid response to any water quality incident?                                          |      | 0 |
|                                                         | Is there a Consumer Service to which non-compliance can be reported?                                                                                            | 1    |   |
| Community Awareness                                     | Is there a mechanism system to receive and actively address community complaints in a timely fashion?                                                           | 1    |   |
|                                                         | Are there procedures for promptly advising of any significant incidents within the drinking water supply including notification of the public health authority? | 1    |   |
|                                                         | Is there any water quality information system available to consumers through annual reports and in the internet?                                                | 1    |   |
| Maximum possible score for <i>Community Involvement</i> |                                                                                                                                                                 | 6    |   |
| Total score attained for <i>Community Involvement</i>   |                                                                                                                                                                 | 4    |   |
| Weight for <i>Community Involvement</i>                 |                                                                                                                                                                 | 0.05 |   |
| Total weighted score for <i>Community Involvement</i>   |                                                                                                                                                                 |      |   |

| TABLE 5.9                                                      |                |
|----------------------------------------------------------------|----------------|
| NON-TECHNICAL (MANAGEMENT) COMPLIANCE SCORING:                 |                |
| Total Weighted Scoring for Tshedza Package plant <u>93.1 %</u> |                |
| Compliance Criterion                                           | Weighted Score |
| 2. NON-TECHNICAL ASSESSMENT                                    |                |
| 2A: Management Issues                                          | 0.0928         |
| 2B: Management Practices                                       | 0.2            |
| 2C: Human Resources                                            | 0.155          |
| 2D: Financial Systems                                          | 0.1            |
| 2E: Communication Systems                                      | 0.2            |
| 2F: Safety, Health and Environmental Quality                   | 0.15           |
| 2G: Community Involvement and Awareness                        | 0.033          |
| TOTAL WEIGHTED SCORE                                           | 0.931          |

| TABLE 5.10                                    |
|-----------------------------------------------|
| NON-TECHNICAL (MANAGEMENT) COMPLIANCE RATING: |

| Total Weighted Score | Rating Description                                                                                    |
|----------------------|-------------------------------------------------------------------------------------------------------|
| 0 – 50               | <i>Class 3 Compliance:</i><br>Total non-compliance; serious and immediate intervention required (TAC) |
| 50 – 90              | <i>Class 2 Compliance:</i><br>Serious challenges requiring attention and improvement                  |
| 90 – 100             | <i>Class 1 Compliance:</i><br>Acceptable compliance                                                   |

# DZINGAHE PACKAGE PLANT

19 August 2009

| TABLE 6.1<br>NON-TECHNICAL (MANAGEMENT) COMPLIANCE SCORING |        |
|------------------------------------------------------------|--------|
| Criterion                                                  | Weight |
| <b>2. NON-TECHNICAL ASSESSMENT</b>                         |        |
| 2A: Management Issues                                      | 0.1    |
| 2B: Management Practices                                   | 0.2    |
| 2C: Human Resources                                        | 0.2    |
| 2D: Financial Systems                                      | 0.1    |
| 2E: Communication Systems                                  | 0.2    |
| 2F: Safety, Health and Environmental Quality               | 0.15   |
| 2G: Community Involvement and Awareness                    | 0.05   |
| TOTAL                                                      | 1.0    |

| NON-TECHNICAL COMPLIANCE (MANAGEMENT) SCORING: Table 6.2 |                                                                           |        |
|----------------------------------------------------------|---------------------------------------------------------------------------|--------|
| Criterion                                                | Yes =1                                                                    | No = 0 |
| <b>2. NON-TECHNICAL ASSESSMENT</b>                       |                                                                           |        |
| <b>2A: Management Issues</b>                             |                                                                           |        |
| 1 of 1                                                   | Does a strategic plan for the assessment of drinking water supply systems | 1      |

|                                                     |                                                                                                                                                                |        |   |
|-----------------------------------------------------|----------------------------------------------------------------------------------------------------------------------------------------------------------------|--------|---|
|                                                     | exist?                                                                                                                                                         |        |   |
|                                                     | Are there preventive strategic plans for drinking water quality management?                                                                                    | 1      |   |
|                                                     | Is there a strategic plan for recruitment of personnel per water treatment plant available?                                                                    | 1      |   |
|                                                     | Is there a strategic plan for operational monitoring and verification of drinking water system?                                                                | 1      |   |
|                                                     | Is there a strategic plan for sharing and clarifying roles and responsibilities among all personnel involved in the production of safe drinking water quality? | 1      |   |
|                                                     | Does a strategic plan for training and development of water plant personnel, and for community involvement and awareness exist?                                | 1      |   |
|                                                     | Is there any funding strategic plan for implementation of drinking water quality management programmes?                                                        | 1      |   |
| Assm of tact plans                                  | Does a tactical plan for handling emergencies including communication of such emergencies to communities exist?                                                | 1      |   |
|                                                     | Is the overall periodic overseeing of water care function performed?                                                                                           | 1      |   |
|                                                     | Is there maintenance and asset management plans?                                                                                                               |        | 0 |
| Assessment of operational plans                     | Is the attendance of process controllers (and in particular shift workers) at the treatment plant monitored? Is there a clock-in-system for the attendance?    | 1      |   |
|                                                     | Is the superintendent available to operators on a day-to-day basis?                                                                                            | 1      |   |
|                                                     | Is there a substitute system plan put in place when one of the operators is ill or away attending a course?                                                    | 1      |   |
|                                                     | Are the supervisors and process controllers aware of their job requirements? Are job descriptions available?                                                   | 1      |   |
| Maximum possible score for <i>Management Issues</i> |                                                                                                                                                                | 14     |   |
| Total score attained for <i>Management Issues</i>   |                                                                                                                                                                | 13     |   |
| Weight for <i>Management Issues</i>                 |                                                                                                                                                                | 0.1    |   |
| Total weighted score for <i>Management Issues</i>   |                                                                                                                                                                | 0.0929 |   |

| NON-TECHNICAL COMPLIANCE (MANAGEMENT) SCORING: Table 6.3                                                                      |        |        |
|-------------------------------------------------------------------------------------------------------------------------------|--------|--------|
| Criterion                                                                                                                     | Yes =1 | No = 0 |
| <b>2. NON-TECHNICAL ASSESSMENT</b>                                                                                            |        |        |
| <b>2B: Management Practices</b>                                                                                               |        |        |
| Do the WSPs use existing local (Emanti/DWAF) or international management practices? Are they implementing them in their water | 1      |        |

|                                                        |                                                                                                                |            |  |
|--------------------------------------------------------|----------------------------------------------------------------------------------------------------------------|------------|--|
|                                                        | treatment plants?                                                                                              |            |  |
|                                                        | Are the WSPs able to understand the existing local or international practices and implementing them correctly? | 1          |  |
|                                                        | When local or international practices are not available, are the WSPs able to draw their own criteria?         | 1          |  |
| <b>Maximum possible score for Management Practices</b> |                                                                                                                | <b>3</b>   |  |
| <b>Total score attained for Management Practices</b>   |                                                                                                                | <b>3</b>   |  |
| <b>Weight for Management Practices</b>                 |                                                                                                                | <b>0.2</b> |  |
| <b>Total weighted score for Management Practices</b>   |                                                                                                                | <b>0.2</b> |  |

| NON-TECHNICAL COMPLIANCE (MANAGEMENT) SCORING: Table 6.4 |                                                                                                             |           |          |
|----------------------------------------------------------|-------------------------------------------------------------------------------------------------------------|-----------|----------|
| Criterion                                                |                                                                                                             | Yes<br>=1 | No<br>=0 |
| <b>2. NON-TECHNICAL ASSESSMENT</b>                       |                                                                                                             |           |          |
| <b>2C: Human Resources</b>                               |                                                                                                             |           |          |
| <b>Personnel at the plant</b>                            | Is the number of personnel related to the size of the plant?                                                |           | 0        |
|                                                          | Are the needs of process controllers/supervisors and shift workers per plants adequate?                     |           | 0        |
|                                                          | Are there specific guidelines/rules for shift workers and their deployment?                                 | 1         |          |
|                                                          | How many operators are there in total? How many shift workers?                                              | 1         |          |
| <b>Qualifications of Personnel</b>                       | How many operators with qualifications in the DWAF categories?                                              | 1         |          |
|                                                          | Are personnel being correctly applied according to their qualifications?                                    | 1         |          |
|                                                          | Are there guidelines or formal rules for upgrading of qualifications?                                       | 1         |          |
| <b>Training Needs</b>                                    | Are there in service training programmes and policies? What is the in-service training policy of the WSA?   | 1         |          |
|                                                          | Do process controllers / supervisors / managers know what training opportunities and courses are available? | 1         |          |
|                                                          | Are they sent on courses regularly?                                                                         | 1         |          |
|                                                          | Are there specific criteria or formal rules to be qualified for training?                                   | 1         |          |
|                                                          | Are there specific promotion requirement protocols in place?                                                | 1         |          |

|                                                   |                                                                                                            |       |   |
|---------------------------------------------------|------------------------------------------------------------------------------------------------------------|-------|---|
|                                                   | Are there career advancement opportunities?                                                                | 1     |   |
| Plant class                                       | Is the plant classified by DWAF?                                                                           |       | 0 |
|                                                   | Has it been done according to the new classification system?                                               |       | 0 |
| Working Conditions                                | Are the responsibilities of process controllers, supervisors and plant managers in line with their salary? |       | 0 |
|                                                   | What system is used for overtime management and payment?                                                   | 1     |   |
|                                                   | What is the WSA policy on conflict management (internal and external)?                                     | 1     |   |
|                                                   | Is any medical assistance available for on the job injuries?                                               | 1     |   |
|                                                   | Can all workers participate in medical schemes?                                                            | 1     |   |
|                                                   | Are the retirement/pension-aid benefits, the housing and travel allowance benefits available?              | 1     |   |
|                                                   | Are the leave benefits (vacation /study/ sick), and the bonus scheme available?                            | 1     |   |
|                                                   | Are there any other incentives?                                                                            | 1     |   |
|                                                   | Are plant personnel satisfied with their working environment?                                              | 1     |   |
|                                                   | Are the relationships between supervisors and their subordinates good or poor?                             | 1     |   |
|                                                   | Is there any performance indicators?                                                                       | 1     |   |
| Maximum possible score for <i>Human Resources</i> |                                                                                                            | 27    |   |
| Total score attained for <i>Human Resources</i>   |                                                                                                            | 22    |   |
| Weight for <i>Human Resources</i>                 |                                                                                                            | 0.2   |   |
| Total weighted score for <i>Human Resources</i>   |                                                                                                            | 0.163 |   |

| NON-TECHNICAL COMPLIANCE (MANAGEMENT) SCORING: Table 6.5 |                                                                                   |        |        |
|----------------------------------------------------------|-----------------------------------------------------------------------------------|--------|--------|
| Criterion                                                |                                                                                   | Yes =1 | No = 0 |
| <b>2. NON-TECHNICAL ASSESSMENT</b>                       |                                                                                   |        |        |
| <b>2D: Financial Systems</b>                             |                                                                                   |        |        |
| Financial Systems Sharing in Place                       | Which financial systems are in place?                                             | 1      |        |
|                                                          | Are there sufficient funds for operation, maintenance and overtime?               |        | 0      |
|                                                          | Do the size of the plants (small versus large) influence the allocation of funds? | 1      |        |
|                                                          | Does the WSA's budgeting system work in relation to emergency funds,              | 1      |        |



|                                                     |                                                                                                             |       |  |
|-----------------------------------------------------|-------------------------------------------------------------------------------------------------------------|-------|--|
|                                                     | scheduled upgrading/extensions, unscheduled rehabilitation/upgrading?                                       |       |  |
| Information Sharing in Place                        | Are there communication channels and transparency between the financial section and the water care section? | 1     |  |
|                                                     | Are regular meetings held? Who attends / chairs these meetings?                                             | 1     |  |
|                                                     | Are decisions taken at consensus / majority?                                                                | 1     |  |
|                                                     | Are reports freely available?                                                                               | 1     |  |
| Procurement System                                  | Is the procurement system transparent?                                                                      | 1     |  |
|                                                     | Is the procurement system open to all?                                                                      | 1     |  |
|                                                     | Is the water sector involved in the adjudication of tenders?                                                | 1     |  |
| Maximum possible score for <i>Financial Systems</i> |                                                                                                             | 11    |  |
| Total score attained for <i>Financial Systems</i>   |                                                                                                             | 10    |  |
| Weight for <i>Financial Systems</i>                 |                                                                                                             | 0.1   |  |
| Total weighted score for <i>Financial Systems</i>   |                                                                                                             | 0.091 |  |

| NON-TECHNICAL COMPLIANCE (MANAGEMENT) SCORING: Table 6.6 |                                                                                                               |        |        |
|----------------------------------------------------------|---------------------------------------------------------------------------------------------------------------|--------|--------|
| Criterion                                                |                                                                                                               | Yes =1 | No = 0 |
| <b>2. NON-TECHNICAL ASSESSMENT</b>                       |                                                                                                               |        |        |
| <b>2E: Communication Systems</b>                         |                                                                                                               |        |        |
| Internal                                                 | Are there sufficient internal communication channels in place, including the needs and shortcomings?          | 1      |        |
|                                                          | Are these communication channels effective?                                                                   | 1      |        |
|                                                          | Is the communication between supervisors and process controllers good or poor?                                | 1      |        |
|                                                          | Is there any interaction between the maintenance team and the rest of personnel in the water treatment plant? | 1      |        |
|                                                          | Is the communication between management and lower level process controllers good or poor?                     | 1      |        |
| External                                                 | Are there sufficient communication channels with other Municipalities and/or Departments?                     | 1      |        |

|                                                                |                                                                    |            |  |
|----------------------------------------------------------------|--------------------------------------------------------------------|------------|--|
|                                                                | Are there sufficient communication channels with consumers?        | 1          |  |
|                                                                | Are these external communication channels effective, good or poor? | 1          |  |
| <b>Maximum possible score for <i>Communication Systems</i></b> |                                                                    | <b>8</b>   |  |
| <b>Total score attained for <i>Communication Systems</i></b>   |                                                                    | <b>8</b>   |  |
| <b>Weight for <i>Communication Systems</i></b>                 |                                                                    | <b>0.2</b> |  |
| <b>Total weighted score for <i>Communication Systems</i></b>   |                                                                    | <b>0.2</b> |  |

| NON-TECHNICAL COMPLIANCE (MANAGEMENT) SCORING: Table 6.7     |                                                                                                                                                         |             |        |
|--------------------------------------------------------------|---------------------------------------------------------------------------------------------------------------------------------------------------------|-------------|--------|
| Criterion                                                    |                                                                                                                                                         | Yes =1      | No = 0 |
| <b>2. NON-TECHNICAL ASSESSMENT</b>                           |                                                                                                                                                         |             |        |
| <b>2F: Audit of safety, health and environmental quality</b> |                                                                                                                                                         |             |        |
| <b>Safety Matters</b>                                        | Are there water and safety management procedures for normal operation, incidents and emergency situations?                                              | 1           |        |
|                                                              | Is there any safety plan at water treatment plants including the safety of process controllers on duties?                                               |             | 0      |
|                                                              | Are there emergency plans in place for chlorine leaks?                                                                                                  | 1           |        |
|                                                              | Are there hazardous chemicals and ablution facilities, appropriate fire extinguishers location?                                                         | 1           |        |
|                                                              | Are safety meetings held regularly and who attends such meetings?                                                                                       | 1           |        |
| <b>Health Aspects</b>                                        | Are there representatives for health and safety of consumers? If yes, are they effective?                                                               |             | 0      |
|                                                              | Are there control measures that identify risks and ensure that health based-targets are met in terms of providing safe drinking water to all consumers? | 1           |        |
|                                                              | Are there emergency measures in place for water quality health impact?                                                                                  | 1           |        |
| <b>Environmental Quality</b>                                 | Are process controllers satisfied with their working environment?                                                                                       | 1           |        |
|                                                              | Is the working environment appropriate for improving or accelerating the service delivery?                                                              | 1           |        |
|                                                              | Is there any strategic plan to improve the quality of the working environment?                                                                          | 1           |        |
| <b>Maximum possible score for <i>SHEQ</i></b>                |                                                                                                                                                         | <b>11</b>   |        |
| <b>Total score attained for <i>SHEQ</i></b>                  |                                                                                                                                                         | <b>9</b>    |        |
| <b>Weight for <i>SHEQ</i></b>                                |                                                                                                                                                         | <b>0.15</b> |        |

|                               |       |
|-------------------------------|-------|
| Total weighted score for SHEQ | 0.123 |
|-------------------------------|-------|

| NON-TECHNICAL COMPLIANCE (MANAGEMENT) SCORING: Table 6.8 |                                                                                                                                                                 |        |        |
|----------------------------------------------------------|-----------------------------------------------------------------------------------------------------------------------------------------------------------------|--------|--------|
| Criterion                                                |                                                                                                                                                                 | Yes =1 | No = 0 |
| <b>2. NON-TECHNICAL ASSESSMENT</b>                       |                                                                                                                                                                 |        |        |
| <b>2G: Community involvement and awareness</b>           |                                                                                                                                                                 |        |        |
| Community Involvement                                    | Are there protocols involved communities in decision-making?                                                                                                    |        | 0      |
|                                                          | Is there an effective reporting system for communities to assist in more rapid response to any water quality incident?                                          |        | 0      |
|                                                          | Is there a Consumer Service to which non-compliance can be reported?                                                                                            |        | 0      |
| Community Awareness                                      | Is there a mechanism system to receive and actively address community complaints in a timely fashion?                                                           | 1      |        |
|                                                          | Are there procedures for promptly advising of any significant incidents within the drinking water supply including notification of the public health authority? | 1      |        |
|                                                          | Is there any water quality information system available to consumers through annual reports and in the internet?                                                | 1      |        |
| Maximum possible score for <i>Community Involvement</i>  |                                                                                                                                                                 | 6      |        |
| Total score attained for <i>Community Involvement</i>    |                                                                                                                                                                 | 3      |        |
| Weight for <i>Community Involvement</i>                  |                                                                                                                                                                 | 0.05   |        |
| Total weighted score for <i>Community Involvement</i>    |                                                                                                                                                                 | 0.25   |        |

| TABLE 6.9                                                       |                |
|-----------------------------------------------------------------|----------------|
| NON-TECHNICAL (MANAGEMENT) COMPLIANCE SCORING:                  |                |
| Total Weighted Scoring for Dzingahe Package plant <u>89.5 %</u> |                |
| Compliance Criterion                                            | Weighted Score |
| <b>2. NON-TECHNICAL ASSESSMENT</b>                              |                |
| <b>2A: Management Issues</b>                                    | 0.093          |
| <b>2B: Management Practices</b>                                 | 0.2            |
| <b>2C: Human Resources</b>                                      | 0.163          |
| <b>2D: Financial Systems</b>                                    | 0.091          |

|                                              |              |
|----------------------------------------------|--------------|
| 2E: Communication Systems                    | 0.2          |
| 2F: Safety, Health and Environmental Quality | 0.123        |
| 2G: Community Involvement and Awareness      | 0.025        |
| <b>TOTAL WEIGHTED SCORE</b>                  | <b>0.895</b> |

| TABLE 6.10<br>NON-TECHNICAL (MANAGEMENT) COMPLIANCE RATING: |                                                                                                       |
|-------------------------------------------------------------|-------------------------------------------------------------------------------------------------------|
| Total Weighted Score                                        | Rating Description                                                                                    |
| 0 – 50                                                      | <i>Class 3 Compliance:</i><br>Total non-compliance; serious and immediate intervention required (TAC) |
| 50 – 90                                                     | <i>Class 2 Compliance:</i><br>Serious challenges requiring attention and improvement                  |
| 90 – 100                                                    | <i>Class 1 Compliance:</i><br>Acceptable compliance                                                   |

#### MALAMULELE TREATMENT WATER PLANT

10 May 2011

| TABLE 7.1<br>NON-TECHNICAL (MANAGEMENT) COMPLIANCE SCORING |        |
|------------------------------------------------------------|--------|
| Criterion                                                  | Weight |
| <b>2. NON-TECHNICAL ASSESSMENT</b>                         |        |
| 2A: Management Issues                                      | 0.1    |
| 2B: Management Practices                                   | 0.2    |
| 2C: Human Resources                                        | 0.2    |
| 2D: Financial Systems                                      | 0.1    |
| 2E: Communication Systems                                  | 0.2    |
| 2F: Safety, Health and Environmental Quality               | 0.15   |
| 2G: Community Involvement and Awareness                    | 0.05   |

|              |            |
|--------------|------------|
| <b>TOTAL</b> | <b>1.0</b> |
|--------------|------------|

| <b>NON-TECHNICAL COMPLIANCE (MANAGEMENT) SCORING: Table 7.2</b> |                                                                                                                                                                |               |               |
|-----------------------------------------------------------------|----------------------------------------------------------------------------------------------------------------------------------------------------------------|---------------|---------------|
| <b>Criterion</b>                                                |                                                                                                                                                                | <b>Yes =1</b> | <b>No = 0</b> |
| <b>2. NON-TECHNICAL ASSESSMENT</b>                              |                                                                                                                                                                |               |               |
| <b>2A: Management Issues</b>                                    |                                                                                                                                                                |               |               |
| <b>Assessment of strategic plans</b>                            | Does a strategic plan for the assessment of drinking water supply systems exist?                                                                               | <b>1</b>      |               |
|                                                                 | Are there preventive strategic plans for drinking water quality management?                                                                                    | <b>1</b>      |               |
|                                                                 | Is there a strategic plan for recruitment of personnel per water treatment plant available?                                                                    | <b>1</b>      |               |
|                                                                 | Is there a strategic plan for operational monitoring and verification of drinking water system?                                                                | <b>1</b>      |               |
|                                                                 | Is there a strategic plan for sharing and clarifying roles and responsibilities among all personnel involved in the production of safe drinking water quality? | <b>1</b>      |               |
|                                                                 | Does a strategic plan for training and development of water plant personnel, and for community involvement and awareness exist?                                | <b>1</b>      |               |
|                                                                 | Is there any funding strategic plan for implementation of drinking water quality management programmes?                                                        | <b>1</b>      |               |
| <b>Assessment of tact plans</b>                                 | Does a tactical plan for handling emergencies including communication of such emergencies to communities exist?                                                | <b>1</b>      |               |
|                                                                 | Is the overall periodic overseeing of water care function performed?                                                                                           | <b>1</b>      |               |
|                                                                 | Is there maintenance and asset management plans?                                                                                                               | <b>1</b>      |               |
| <b>Assessment of operational plans</b>                          | Is the attendance of process controllers (and in particular shift workers) at the treatment plant monitored? Is there a clock-in-system for the attendance?    | <b>1</b>      |               |
|                                                                 | Is the superintendent available to operators on a day-to-day basis?                                                                                            | <b>1</b>      |               |
|                                                                 | Is there a substitute system plan put in place when one of the operators is ill or away attending a course?                                                    | <b>1</b>      |               |
|                                                                 | Are the supervisors and process controllers aware of their job requirements? Are job descriptions available?                                                   | <b>1</b>      |               |
| <b>Maximum possible score for Management Issues</b>             |                                                                                                                                                                | <b>14</b>     |               |
| <b>Total score attained for Management Issues</b>               |                                                                                                                                                                | <b>14</b>     |               |
| <b>Weight for Management Issues</b>                             |                                                                                                                                                                | <b>0.1</b>    |               |

|                                                   |     |
|---------------------------------------------------|-----|
| Total weighted score for <i>Management Issues</i> | 0.1 |
|---------------------------------------------------|-----|

| NON-TECHNICAL COMPLIANCE (MANAGEMENT) SCORING: Table 7.3      |                                                                                                                                                 |            |        |
|---------------------------------------------------------------|-------------------------------------------------------------------------------------------------------------------------------------------------|------------|--------|
| Criterion                                                     |                                                                                                                                                 | Yes =1     | No = 0 |
| <b>2. NON-TECHNICAL ASSESSMENT</b>                            |                                                                                                                                                 |            |        |
| <b>2B: Management Practices</b>                               |                                                                                                                                                 |            |        |
|                                                               | Do the WSPs use existing local (Emanti/DWAF) or international management practices? Are they implementing them in their water treatment plants? | 1          |        |
|                                                               | Are the WPSs able to understand the existing local or international practices and implementing them correctly?                                  | 1          |        |
|                                                               | When local or international practices are not available, are the WSPs able to draw their own criteria?                                          | 1          |        |
| <b>Maximum possible score for <i>Management Practices</i></b> |                                                                                                                                                 | <b>3</b>   |        |
| <b>Total score attained for <i>Management Practices</i></b>   |                                                                                                                                                 | <b>3</b>   |        |
| <b>Weight for <i>Management Practices</i></b>                 |                                                                                                                                                 | <b>0.2</b> |        |
| <b>Total weighted score for <i>Management Practices</i></b>   |                                                                                                                                                 | <b>0.2</b> |        |

| NON-TECHNICAL COMPLIANCE (MANAGEMENT) SCORING: Table 7.4 |                                                                                         |        |        |
|----------------------------------------------------------|-----------------------------------------------------------------------------------------|--------|--------|
| Criterion                                                |                                                                                         | Yes =1 | No = 0 |
| <b>2. NON-TECHNICAL ASSESSMENT</b>                       |                                                                                         |        |        |
| <b>2C: Human Resources</b>                               |                                                                                         |        |        |
| Personnel at the plant                                   | Is the number of personnel related to the size of the plant?                            |        | 0      |
|                                                          | Are the needs of process controllers/supervisors and shift workers per plants adequate? |        | 0      |
|                                                          | Are there specific guidelines/rules for shift workers and their deployment?             | 1      |        |
|                                                          | How many operators are there in total? How many shift workers?                          | 1      |        |
| Qualifications of Personnel                              | How many operators with qualifications in the DWAF categories?                          | 1      |        |
|                                                          | Are personnel being correctly applied according to their qualifications?                | 1      |        |
|                                                          | Are there guidelines or formal rules for upgrading of qualifications?                   | 1      |        |

|                                                   |                                                                                                             |       |   |
|---------------------------------------------------|-------------------------------------------------------------------------------------------------------------|-------|---|
| Training Needs                                    | Are there in service training programmes and policies? What is the in-service training policy of the WSA?   | 1     |   |
|                                                   | Do process controllers / supervisors / managers know what training opportunities and courses are available? | 1     |   |
|                                                   | Are they sent on courses regularly?                                                                         | 1     |   |
|                                                   | Are there specific criteria or formal rules to be qualified for training?                                   | 1     |   |
|                                                   | Are there specific promotion requirement protocols in place?                                                | 1     |   |
|                                                   | Are there career advancement opportunities?                                                                 | 1     |   |
| Plant class                                       | Is the plant classified by DWAF?                                                                            | 1     |   |
|                                                   | Has it been done according to the new classification system?                                                | 1     |   |
| Working Conditions                                | Are the responsibilities of process controllers, supervisors and plant managers in line with their salary?  |       | 0 |
|                                                   | What system is used for overtime management and payment?                                                    | 1     |   |
|                                                   | What is the WSA policy on conflict management (internal and external)?                                      | 1     |   |
|                                                   | Is any medical assistance available for on the job injuries?                                                | 1     |   |
|                                                   | Can all workers participate in medical schemes?                                                             | 1     |   |
|                                                   | Are the retirement/pension-aid benefits, the housing and travel allowance benefits available?               | 1     |   |
|                                                   | Are the leave benefits (vacation /study/ sick), and the bonus scheme available?                             | 1     |   |
|                                                   | Are there any other incentives?                                                                             | 1     |   |
|                                                   | Are plant personnel satisfied with their working environment?                                               | 1     |   |
|                                                   | Are the relationships between supervisors and their subordinates good or poor?                              | 1     |   |
|                                                   | Is there any performance indicators?                                                                        | 1     |   |
| Maximum possible score for <i>Human Resources</i> |                                                                                                             | 27    |   |
| Total score attained for <i>Human Resources</i>   |                                                                                                             | 24    |   |
| Weight for <i>Human Resources</i>                 |                                                                                                             | 0.2   |   |
| Total weighted score for <i>Human Resources</i>   |                                                                                                             | 0.178 |   |

| NON-TECHNICAL COMPLIANCE (MANAGEMENT) SCORING: Table 7.5 |        |       |
|----------------------------------------------------------|--------|-------|
| Criterion                                                | Yes =1 | No =0 |
| 2. NON-TECHNICAL ASSESSMENT                              |        |       |

| 2D: Financial Systems                               |                                                                                                                                            |     |  |
|-----------------------------------------------------|--------------------------------------------------------------------------------------------------------------------------------------------|-----|--|
| Financial Systems Sharing in Place                  | Which financial systems are in place?                                                                                                      | 1   |  |
|                                                     | Are there sufficient funds for operation, maintenance and overtime?                                                                        | 1   |  |
|                                                     | Do the size of the plants (small versus large) influence the allocation of funds?                                                          | 1   |  |
|                                                     | Does the WSA's budgeting system work in relation to emergency funds, scheduled upgrading/extensions, unscheduled rehabilitation/upgrading? | 1   |  |
| Information Sharing in Place                        | Are there communication channels and transparency between the financial section and the water care section?                                | 1   |  |
|                                                     | Are regular meetings held? Who attends / chairs these meetings?                                                                            | 1   |  |
|                                                     | Are decisions taken at consensus / majority?                                                                                               | 1   |  |
|                                                     | Are reports freely available?                                                                                                              | 1   |  |
| Procurement System                                  | Is the procurement system transparent?                                                                                                     | 1   |  |
|                                                     | Is the procurement system open to all?                                                                                                     | 1   |  |
|                                                     | Is the water sector involved in the adjudication of tenders?                                                                               | 1   |  |
| Maximum possible score for <i>Financial Systems</i> |                                                                                                                                            | 11  |  |
| Total score attained for <i>Financial Systems</i>   |                                                                                                                                            | 11  |  |
| Weight for <i>Financial Systems</i>                 |                                                                                                                                            | 0.1 |  |
| Total weighted score for <i>Financial Systems</i>   |                                                                                                                                            | 0.1 |  |

| NON-TECHNICAL COMPLIANCE (MANAGEMENT) SCORING: Table 7.6 |                                                                                                      |        |       |
|----------------------------------------------------------|------------------------------------------------------------------------------------------------------|--------|-------|
| Criterion                                                |                                                                                                      | Yes =1 | No =0 |
| 2. NON-TECHNICAL ASSESSMENT                              |                                                                                                      |        |       |
| 2E: Communication Systems                                |                                                                                                      |        |       |
| Internal                                                 | Are there sufficient internal communication channels in place, including the needs and shortcomings? | 1      |       |
|                                                          | Are these communication channels effective?                                                          | 1      |       |



|                                                         |                                                                                                               |     |  |
|---------------------------------------------------------|---------------------------------------------------------------------------------------------------------------|-----|--|
|                                                         | Is the communication between supervisors and process controllers good or poor?                                | 1   |  |
|                                                         | Is there any interaction between the maintenance team and the rest of personnel in the water treatment plant? | 1   |  |
|                                                         | Is the communication between management and lower level process controllers good or poor?                     | 1   |  |
| External                                                | Are there sufficient communication channels with other Municipalities and/or Departments?                     | 1   |  |
|                                                         | Are there sufficient communication channels with consumers?                                                   | 1   |  |
|                                                         | Are these external communication channels effective, good or poor?                                            | 1   |  |
| Maximum possible score for <i>Communication Systems</i> |                                                                                                               | 8   |  |
| Total score attained for <i>Communication Systems</i>   |                                                                                                               | 8   |  |
| Weight for <i>Communication Systems</i>                 |                                                                                                               | 0.2 |  |
| Total weighted score for <i>Communication Systems</i>   |                                                                                                               | 0.2 |  |

| NON-TECHNICAL COMPLIANCE (MANAGEMENT) SCORING: Table 7.7     |                                                                                                                                                         |        |       |
|--------------------------------------------------------------|---------------------------------------------------------------------------------------------------------------------------------------------------------|--------|-------|
| Criterion                                                    |                                                                                                                                                         | Yes =1 | No =0 |
| <b>2. NON-TECHNICAL ASSESSMENT</b>                           |                                                                                                                                                         |        |       |
| <b>2F: Audit of safety, health and environmental quality</b> |                                                                                                                                                         |        |       |
| Safety Matters                                               | Are there water and safety management procedures for normal operation, incidents and emergency situations?                                              | 1      |       |
|                                                              | Is there any safety plan at water treatment plants including the safety of process controllers on duties?                                               | 1      |       |
|                                                              | Are there emergency plans in place for chlorine leaks?                                                                                                  | 1      |       |
|                                                              | Are there hazardous chemicals and ablution facilities, appropriate fire extinguishers location?                                                         | 1      |       |
|                                                              | Are safety meetings held regularly and who attends such meetings?                                                                                       | 1      |       |
| Health Aspects                                               | Are there representatives for health and safety of consumers? If yes, are they effective?                                                               | 1      |       |
|                                                              | Are there control measures that identify risks and ensure that health based-targets are met in terms of providing safe drinking water to all consumers? | 1      |       |
|                                                              | Are there emergency measures in place for water quality health impact?                                                                                  | 1      |       |
| m<br>e<br>n<br>t<br>a<br>l                                   | Are process controllers satisfied with their working environment?                                                                                       | 1      |       |

|                                        |                                                                                            |             |  |
|----------------------------------------|--------------------------------------------------------------------------------------------|-------------|--|
|                                        | Is the working environment appropriate for improving or accelerating the service delivery? | 1           |  |
|                                        | Is there any strategic plan to improve the quality of the working environment?             | 1           |  |
| <b>Maximum possible score for SHEQ</b> |                                                                                            | <b>11</b>   |  |
| <b>Total score attained for SHEQ</b>   |                                                                                            | <b>11</b>   |  |
| <b>Weight for SHEQ</b>                 |                                                                                            | <b>0.15</b> |  |
| <b>Total weighted score for SHEQ</b>   |                                                                                            | <b>0.15</b> |  |

| NON-TECHNICAL COMPLIANCE (MANAGEMENT) SCORING: Table 7.8 |                                                                                                                                                                 |              |       |
|----------------------------------------------------------|-----------------------------------------------------------------------------------------------------------------------------------------------------------------|--------------|-------|
| Criterion                                                |                                                                                                                                                                 | Yes =1       | No =0 |
| <b>2. NON-TECHNICAL ASSESSMENT</b>                       |                                                                                                                                                                 |              |       |
| <b>2G: Community involvement and awareness</b>           |                                                                                                                                                                 |              |       |
| <b>Community Involvement</b>                             | Are there protocols involved communities in decision-making?                                                                                                    |              | 0     |
|                                                          | Is there an effective reporting system for communities to assist in more rapid response to any water quality incident?                                          | 1            |       |
|                                                          | Is there a Consumer Service to which non-compliance can be reported?                                                                                            | 1            |       |
| <b>Community Awareness</b>                               | Is there a mechanism system to receive and actively address community complaints in a timely fashion?                                                           | 1            |       |
|                                                          | Are there procedures for promptly advising of any significant incidents within the drinking water supply including notification of the public health authority? | 1            |       |
|                                                          | Is there any water quality information system available to consumers through annual reports and in the internet?                                                | 1            |       |
| <b>Maximum possible score for Community Involvement</b>  |                                                                                                                                                                 | <b>6</b>     |       |
| <b>Total score attained for Community Involvement</b>    |                                                                                                                                                                 | <b>5</b>     |       |
| <b>Weight for Community Involvement</b>                  |                                                                                                                                                                 | <b>0.05</b>  |       |
| <b>Total weighted score for Community Involvement</b>    |                                                                                                                                                                 | <b>0.042</b> |       |

| TABLE 7.9                                                                 |                |
|---------------------------------------------------------------------------|----------------|
| NON-TECHNICAL (MANAGEMENT) COMPLIANCE SCORING:                            |                |
| Total Weighted Scoring for Malamulele treatment water plant <u>97.0 %</u> |                |
| Compliance Criterion                                                      | Weighted Score |

|                             |                                                 |              |
|-----------------------------|-------------------------------------------------|--------------|
| <b>2.</b>                   | <b>NON-TECHNICAL ASSESSMENT</b>                 |              |
| <b>2A:</b>                  | <b>Management Issues</b>                        | <b>0.1</b>   |
| <b>2B:</b>                  | <b>Management Practices</b>                     | <b>0.2</b>   |
| <b>2C:</b>                  | <b>Human Resources</b>                          | <b>0.178</b> |
| <b>2D:</b>                  | <b>Financial Systems</b>                        | <b>0.1</b>   |
| <b>2E:</b>                  | <b>Communication Systems</b>                    | <b>0.2</b>   |
| <b>2F:</b>                  | <b>Safety, Health and Environmental Quality</b> | <b>0.15</b>  |
| <b>2G:</b>                  | <b>Community Involvement and Awareness</b>      | <b>0.042</b> |
| <b>TOTAL WEIGHTED SCORE</b> |                                                 | <b>0.97</b>  |

| <b>TABLE 7.10</b>                                    |                                                                                                       |
|------------------------------------------------------|-------------------------------------------------------------------------------------------------------|
| <b>NON-TECHNICAL (MANAGEMENT) COMPLIANCE RATING:</b> |                                                                                                       |
| <b>Total Weighted Score</b>                          | <b>Rating Description</b>                                                                             |
| <b>0 – 50</b>                                        | <i>Class 3 Compliance:</i><br>Total non-compliance; serious and immediate intervention required (TAC) |
| <b>50 – 90</b>                                       | <i>Class 2 Compliance:</i><br>Serious challenges requiring attention and improvement                  |
| <b>90 – 100</b>                                      | <i>Class 1 Compliance:</i><br>Acceptable compliance                                                   |

#### VONDO TREATMENT PLANT

13 May 2011

| <b>TABLE 8.1</b>                                     |               |
|------------------------------------------------------|---------------|
| <b>NON-TECHNICAL (MANAGEMENT) COMPLIANCE SCORING</b> |               |
| <b>Criterion</b>                                     | <b>Weight</b> |
| <b>2. NON-TECHNICAL ASSESSMENT</b>                   |               |
| <b>2A: Management Issues</b>                         | <b>0.1</b>    |
| <b>2B: Management Practices</b>                      | <b>0.2</b>    |

|       |                                          |      |
|-------|------------------------------------------|------|
| 2C:   | Human Resources                          | 0.2  |
| 2D:   | Financial Systems                        | 0.1  |
| 2E:   | Communication Systems                    | 0.2  |
| 2F:   | Safety, Health and Environmental Quality | 0.15 |
| 2G:   | Community Involvement and Awareness      | 0.05 |
| TOTAL |                                          | 1.0  |

| NON-TECHNICAL COMPLIANCE (MANAGEMENT) SCORING: Table 8.2 |                                                                                                                                                                |        |       |
|----------------------------------------------------------|----------------------------------------------------------------------------------------------------------------------------------------------------------------|--------|-------|
| Criterion                                                |                                                                                                                                                                | Yes =1 | No =0 |
| <b>2. NON-TECHNICAL ASSESSMENT</b>                       |                                                                                                                                                                |        |       |
| <b>2A: Management Issues</b>                             |                                                                                                                                                                |        |       |
| Assessment of strategic plans                            | Does a strategic plan for the assessment of drinking water supply systems exist?                                                                               | 1      |       |
|                                                          | Are there preventive strategic plans for drinking water quality management?                                                                                    | 1      |       |
|                                                          | Is there a strategic plan for recruitment of personnel per water treatment plant available?                                                                    | 1      |       |
|                                                          | Is there a strategic plan for operational monitoring and verification of drinking water system?                                                                | 1      |       |
|                                                          | Is there a strategic plan for sharing and clarifying roles and responsibilities among all personnel involved in the production of safe drinking water quality? | 1      |       |
|                                                          | Does a strategic plan for training and development of water plant personnel, and for community involvement and awareness exist?                                | 1      |       |
|                                                          | Is there any funding strategic plan for implementation of drinking water quality management programmes?                                                        | 1      |       |
| Assessment of tact plans                                 | Does a tactical plan for handling emergencies including communication of such emergencies to communities exist?                                                | 1      |       |
|                                                          | Is the overall periodic overseeing of water care function performed?                                                                                           | 1      |       |
|                                                          | Is there maintenance and asset management plans?                                                                                                               | 1      |       |
| Assessment of operational plans                          | Is the attendance of process controllers (and in particular shift workers) at the treatment plant monitored? Is there a clock-in-system for the attendance?    | 1      |       |
|                                                          | Is the superintendent available to operators on a day-to-day basis?                                                                                            | 1      |       |
|                                                          | Is there a substitute system plan put in place when one of the operators is ill or away attending a course?                                                    | 1      |       |

|                                                            |                                                                                                              |            |  |
|------------------------------------------------------------|--------------------------------------------------------------------------------------------------------------|------------|--|
|                                                            | Are the supervisors and process controllers aware of their job requirements? Are job descriptions available? | 1          |  |
| <b>Maximum possible score for <i>Management Issues</i></b> |                                                                                                              | <b>14</b>  |  |
| <b>Total score attained for <i>Management Issues</i></b>   |                                                                                                              | <b>14</b>  |  |
| <b>Weight for <i>Management Issues</i></b>                 |                                                                                                              | <b>0.1</b> |  |
| <b>Total weighted score for <i>Management Issues</i></b>   |                                                                                                              | <b>0.1</b> |  |

| NON-TECHNICAL COMPLIANCE (MANAGEMENT) SCORING: Table 8.3      |                                                                                                                                                 |            |       |
|---------------------------------------------------------------|-------------------------------------------------------------------------------------------------------------------------------------------------|------------|-------|
| Criterion                                                     |                                                                                                                                                 | Yes =1     | No =0 |
| <b>2. NON-TECHNICAL ASSESSMENT</b>                            |                                                                                                                                                 |            |       |
| <b>2B: Management Practices</b>                               |                                                                                                                                                 |            |       |
|                                                               | Do the WSPs use existing local (Emanti/DWAF) or international management practices? Are they implementing them in their water treatment plants? | 1          |       |
|                                                               | Are the WSPs able to understand the existing local or international practices and implementing them correctly?                                  | 1          |       |
|                                                               | When local or international practices are not available, are the WSPs able to draw their own criteria?                                          | 1          |       |
| <b>Maximum possible score for <i>Management Practices</i></b> |                                                                                                                                                 | <b>3</b>   |       |
| <b>Total score attained for <i>Management Practices</i></b>   |                                                                                                                                                 | <b>3</b>   |       |
| <b>Weight for <i>Management Practices</i></b>                 |                                                                                                                                                 | <b>0.2</b> |       |
| <b>Total weighted score for <i>Management Practices</i></b>   |                                                                                                                                                 | <b>0.2</b> |       |

| NON-TECHNICAL COMPLIANCE (MANAGEMENT) SCORING: Table 8.4 |                                                                                         |        |       |
|----------------------------------------------------------|-----------------------------------------------------------------------------------------|--------|-------|
| Criterion                                                |                                                                                         | Yes =1 | No =0 |
| <b>2. NON-TECHNICAL ASSESSMENT</b>                       |                                                                                         |        |       |
| <b>2C: Human Resources</b>                               |                                                                                         |        |       |
| <b>Personnel at the plant</b>                            | Is the number of personnel related to the size of the plant?                            |        | 0     |
|                                                          | Are the needs of process controllers/supervisors and shift workers per plants adequate? |        | 0     |
|                                                          | Are there specific guidelines/rules for shift workers and their deployment?             | 1      |       |

|                                                   |                                                                                                             |       |  |
|---------------------------------------------------|-------------------------------------------------------------------------------------------------------------|-------|--|
|                                                   | How many operators are there in total? How many shift workers?                                              | 1     |  |
| Qualifications of Personnel                       | How many operators with qualifications in the DWAF categories?                                              | 1     |  |
|                                                   | Are personnel being correctly applied according to their qualifications?                                    | 1     |  |
|                                                   | Are there guidelines or formal rules for upgrading of qualifications?                                       | 1     |  |
|                                                   |                                                                                                             |       |  |
| Training Needs                                    | Are there in service training programmes and policies? What is the in-service training policy of the WSA?   | 1     |  |
|                                                   | Do process controllers / supervisors / managers know what training opportunities and courses are available? | 1     |  |
|                                                   | Are they sent on courses regularly?                                                                         | 1     |  |
|                                                   | Are there specific criteria or formal rules to be qualified for training?                                   | 1     |  |
|                                                   | Are there specific promotion requirement protocols in place?                                                | 1     |  |
|                                                   | Are there career advancement opportunities?                                                                 | 1     |  |
| Plant class                                       | Is the plant classified by DWAF?                                                                            | 1     |  |
|                                                   | Has it been done according to the new classification system?                                                | 1     |  |
| Working Conditions                                | Are the responsibilities of process controllers, supervisors and plant managers in line with their salary?  | 1     |  |
|                                                   | What system is used for overtime management and payment?                                                    | 1     |  |
|                                                   | What is the WSA policy on conflict management (internal and external)?                                      | 1     |  |
|                                                   | Is any medical assistance available for on the job injuries?                                                | 1     |  |
|                                                   | Can all workers participate in medical schemes?                                                             | 1     |  |
|                                                   | Are the retirement/pension-aid benefits, the housing and travel allowance benefits available?               | 1     |  |
|                                                   | Are the leave benefits (vacation /study/ sick), and the bonus scheme available?                             | 1     |  |
|                                                   | Are there any other incentives?                                                                             | 1     |  |
|                                                   | Are plant personnel satisfied with their working environment?                                               | 1     |  |
|                                                   | Are the relationships between supervisors and their subordinates good or poor?                              | 1     |  |
|                                                   | Is there any performance indicators?                                                                        | 1     |  |
| Maximum possible score for <i>Human Resources</i> |                                                                                                             | 27    |  |
| Total score attained for <i>Human Resources</i>   |                                                                                                             | 25    |  |
| Weight for <i>Human Resources</i>                 |                                                                                                             | 0.2   |  |
| Total weighted score for <i>Human Resources</i>   |                                                                                                             | 0.185 |  |

| NON-TECHNICAL COMPLIANCE (MANAGEMENT) SCORING: Table 8.5 |                                                                                                                                            |        |        |
|----------------------------------------------------------|--------------------------------------------------------------------------------------------------------------------------------------------|--------|--------|
| Criterion                                                |                                                                                                                                            | Yes =1 | No = 0 |
| 2. NON-TECHNICAL ASSESSMENT                              |                                                                                                                                            |        |        |
| 2D: Financial Systems                                    |                                                                                                                                            |        |        |
| Financial Systems Sharing in Place                       | Which financial systems are in place?                                                                                                      | 1      |        |
|                                                          | Are there sufficient funds for operation, maintenance and overtime?                                                                        | 1      |        |
|                                                          | Do the size of the plants (small versus large) influence the allocation of funds?                                                          | 1      |        |
|                                                          | Does the WSA’s budgeting system work in relation to emergency funds, scheduled upgrading/extensions, unscheduled rehabilitation/upgrading? | 1      |        |
| Information Sharing in Place                             | Are there communication channels and transparency between the financial section and the water care section?                                | 1      |        |
|                                                          | Are regular meetings held? Who attends / chairs these meetings?                                                                            | 1      |        |
|                                                          | Are decisions taken at consensus / majority?                                                                                               | 1      |        |
|                                                          | Are reports freely available?                                                                                                              | 1      |        |
| Procurement System                                       | Is the procurement system transparent?                                                                                                     | 1      |        |
|                                                          | Is the procurement system open to all?                                                                                                     | 1      |        |
|                                                          | Is the water sector involved in the adjudication of tenders?                                                                               | 1      |        |
| Maximum possible score for <i>Financial Systems</i>      |                                                                                                                                            | 11     |        |
| Total score attained for <i>Financial Systems</i>        |                                                                                                                                            | 11     |        |
| Weight for <i>Financial Systems</i>                      |                                                                                                                                            | 0.1    |        |
| Total weighted score for <i>Financial Systems</i>        |                                                                                                                                            | 0.1    |        |
| NON-TECHNICAL COMPLIANCE (MANAGEMENT) SCORING: Table 8.6 |                                                                                                                                            |        |        |
| Criterion                                                |                                                                                                                                            | Yes =1 | No = 0 |
| 2. NON-TECHNICAL ASSESSMENT                              |                                                                                                                                            |        |        |
| 2E: Communication Systems                                |                                                                                                                                            |        |        |

|                                                                |                                                                                                               |            |  |
|----------------------------------------------------------------|---------------------------------------------------------------------------------------------------------------|------------|--|
| <b>Internal</b>                                                | Are there sufficient internal communication channels in place, including the needs and shortcomings?          | 1          |  |
|                                                                | Are these communication channels effective?                                                                   | 1          |  |
|                                                                | Is the communication between supervisors and process controllers good or poor?                                | 1          |  |
|                                                                | Is there any interaction between the maintenance team and the rest of personnel in the water treatment plant? | 1          |  |
|                                                                | Is the communication between management and lower level process controllers good or poor?                     | 1          |  |
| <b>External</b>                                                | Are there sufficient communication channels with other Municipalities and/or Departments?                     | 1          |  |
|                                                                | Are there sufficient communication channels with consumers?                                                   | 1          |  |
|                                                                | Are these external communication channels effective, good or poor?                                            | 1          |  |
| <b>Maximum possible score for <i>Communication Systems</i></b> |                                                                                                               | <b>8</b>   |  |
| <b>Total score attained for <i>Communication Systems</i></b>   |                                                                                                               | <b>8</b>   |  |
| <b>Weight for <i>Communication Systems</i></b>                 |                                                                                                               | <b>0.2</b> |  |
| <b>Total weighted score for <i>Communication Systems</i></b>   |                                                                                                               | <b>0.2</b> |  |

| <b>NON-TECHNICAL COMPLIANCE (MANAGEMENT) SCORING: Table 8.7</b> |                                                                                                                                               |               |              |
|-----------------------------------------------------------------|-----------------------------------------------------------------------------------------------------------------------------------------------|---------------|--------------|
| <b>Criterion</b>                                                |                                                                                                                                               | <b>Yes =1</b> | <b>No =0</b> |
| <b>2. NON-TECHNICAL ASSESSMENT</b>                              |                                                                                                                                               |               |              |
| <b>2F: Audit of safety, health and environmental quality</b>    |                                                                                                                                               |               |              |
| <b>Safety Matters</b>                                           | Are there water and safety management procedures for normal operation, incidents and emergency situations?                                    | 1             |              |
|                                                                 | Is there any safety plan at water treatment plants including the safety of process controllers on duties?                                     | 1             |              |
|                                                                 | Are there emergency plans in place for chlorine leaks?                                                                                        | 1             |              |
|                                                                 | Are there hazardous chemicals and ablution facilities, appropriate fire extinguishers location?                                               | 1             |              |
|                                                                 | Are safety meetings held regularly and who attends such meetings?                                                                             | 1             |              |
| <b>Health Aspects</b>                                           | Are there representatives for health and safety of consumers? If yes, are they effective?                                                     | 1             |              |
|                                                                 | Are there control measures that identify risks and ensure that health based- targets are met in terms of providing safe drinking water to all | 1             |              |



|                                 |                                                                                            |       |   |
|---------------------------------|--------------------------------------------------------------------------------------------|-------|---|
|                                 | consumers?                                                                                 |       |   |
|                                 | Are there emergency measures in place for water quality health impact?                     | 1     |   |
| Environmental Quality           | Are process controllers satisfied with their working environment?                          | 1     |   |
|                                 | Is the working environment appropriate for improving or accelerating the service delivery? | 1     |   |
|                                 | Is there any strategic plan to improve the quality of the working environment?             |       | 0 |
| Maximum possible score for SHEQ |                                                                                            | 11    |   |
| Total score attained for SHEQ   |                                                                                            | 10    |   |
| Weight for SHEQ                 |                                                                                            | 0.15  |   |
| Total weighted score for SHEQ   |                                                                                            | 0.136 |   |

| NON-TECHNICAL COMPLIANCE (MANAGEMENT) SCORING: Table 8.8 |                                                                                                                                                                 |        |       |
|----------------------------------------------------------|-----------------------------------------------------------------------------------------------------------------------------------------------------------------|--------|-------|
| Criterion                                                |                                                                                                                                                                 | Yes =1 | No =0 |
| <b>2. NON-TECHNICAL ASSESSMENT</b>                       |                                                                                                                                                                 |        |       |
| <b>2G: Community involvement and awareness</b>           |                                                                                                                                                                 |        |       |
| Community Involvement                                    | Are there protocols involved communities in decision-making?                                                                                                    | 1      |       |
|                                                          | Is there an effective reporting system for communities to assist in more rapid response to any water quality incident?                                          | 1      |       |
|                                                          | Is there a Consumer Service to which non-compliance can be reported?                                                                                            | 1      |       |
| Community Awareness                                      | Is there a mechanism system to receive and actively address community complaints in a timely fashion?                                                           | 1      |       |
|                                                          | Are there procedures for promptly advising of any significant incidents within the drinking water supply including notification of the public health authority? | 1      |       |
|                                                          | Is there any water quality information system available to consumers through annual reports and in the internet?                                                | 1      |       |
| Maximum possible score for <i>Community Involvement</i>  |                                                                                                                                                                 | 6      |       |
| Total score attained for <i>Community Involvement</i>    |                                                                                                                                                                 | 6      |       |
| Weight for <i>Community Involvement</i>                  |                                                                                                                                                                 | 0.05   |       |
| Total weighted score for <i>Community Involvement</i>    |                                                                                                                                                                 | 0.05   |       |

| TABLE 8.9                                                      |                |
|----------------------------------------------------------------|----------------|
| NON-TECHNICAL (MANAGEMENT) COMPLIANCE SCORING:                 |                |
| Total Weighted Scoring for Vondo treatment plant <u>97.1 %</u> |                |
| Compliance Criterion                                           | Weighted Score |
| 2. NON-TECHNICAL ASSESSMENT                                    |                |
| 2A: Management Issues                                          | 0.1            |
| 2B: Management Practices                                       | 0.2            |
| 2C: Human Resources                                            | 0.185          |
| 2D: Financial Systems                                          | 0.1            |
| 2E: Communication Systems                                      | 0.2            |
| 2F: Safety, Health and Environmental Quality                   | 0.136          |
| 2G: Community Involvement and Awareness                        | 0.05           |
| TOTAL WEIGHTED SCORE                                           | 97.1           |

| TABLE 8.10                                    |                                                                                                       |
|-----------------------------------------------|-------------------------------------------------------------------------------------------------------|
| NON-TECHNICAL (MANAGEMENT) COMPLIANCE RATING: |                                                                                                       |
| Total Weighted Score                          | Rating Description                                                                                    |
| 0 – 50                                        | <i>Class 3 Compliance:</i><br>Total non-compliance; serious and immediate intervention required (TAC) |
| 50 – 90                                       | <i>Class 2 Compliance:</i><br>Serious challenges requiring attention and improvement                  |
| 90 – 100                                      | <i>Class 1 Compliance:</i><br>Acceptable compliance                                                   |

MUTSHEDZI PLANT

12 May 2011

| TABLE 9.1                                     |
|-----------------------------------------------|
| NON-TECHNICAL (MANAGEMENT) COMPLIANCE SCORING |

| Criterion                                           | Weight      |
|-----------------------------------------------------|-------------|
| <b>2. NON-TECHNICAL ASSESSMENT</b>                  |             |
| <b>2A: Management Issues</b>                        | <b>0.1</b>  |
| <b>2B: Management Practices</b>                     | <b>0.2</b>  |
| <b>2C: Human Resources</b>                          | <b>0.2</b>  |
| <b>2D: Financial Systems</b>                        | <b>0.1</b>  |
| <b>2E: Communication Systems</b>                    | <b>0.2</b>  |
| <b>2F: Safety, Health and Environmental Quality</b> | <b>0.15</b> |
| <b>2G: Community Involvement and Awareness</b>      | <b>0.05</b> |
| <b>TOTAL</b>                                        | <b>1.0</b>  |

| NON-TECHNICAL COMPLIANCE (MANAGEMENT) SCORING: Table 9.2 |                                                                                                                                                                |        |        |
|----------------------------------------------------------|----------------------------------------------------------------------------------------------------------------------------------------------------------------|--------|--------|
| Criterion                                                |                                                                                                                                                                | Yes =1 | No = 0 |
| <b>2. NON-TECHNICAL ASSESSMENT</b>                       |                                                                                                                                                                |        |        |
| <b>2A: Management Issues</b>                             |                                                                                                                                                                |        |        |
| Assessment of strategic plans                            | Does a strategic plan for the assessment of drinking water supply systems exist?                                                                               | 1      |        |
|                                                          | Are there preventive strategic plans for drinking water quality management?                                                                                    | 1      |        |
|                                                          | Is there a strategic plan for recruitment of personnel per water treatment plant available?                                                                    | 1      |        |
|                                                          | Is there a strategic plan for operational monitoring and verification of drinking water system?                                                                | 1      |        |
|                                                          | Is there a strategic plan for sharing and clarifying roles and responsibilities among all personnel involved in the production of safe drinking water quality? | 1      |        |
|                                                          | Does a strategic plan for training and development of water plant personnel, and for community involvement and awareness exist?                                | 1      |        |
|                                                          | Is there any funding strategic plan for implementation of drinking water quality management programmes?                                                        | 1      |        |
| Assm of tact plans                                       | Does a tactical plan for handling emergencies including communication of such emergencies to communities exist?                                                | 1      |        |
|                                                          | Is the overall periodic overseeing of water care function performed?                                                                                           | 1      |        |
|                                                          | Is there maintenance and asset management plans?                                                                                                               | 1      |        |

|                                                     |                                                                                                                                                             |     |  |
|-----------------------------------------------------|-------------------------------------------------------------------------------------------------------------------------------------------------------------|-----|--|
| Assessment of operational plans                     | Is the attendance of process controllers (and in particular shift workers) at the treatment plant monitored? Is there a clock-in-system for the attendance? | 1   |  |
|                                                     | Is the superintendent available to operators on a day-to-day basis?                                                                                         | 1   |  |
|                                                     | Is there a substitute system plan put in place when one of the operators is ill or away attending a course?                                                 | 1   |  |
|                                                     | Are the supervisors and process controllers aware of their job requirements? Are job descriptions available?                                                | 1   |  |
| Maximum possible score for <i>Management Issues</i> |                                                                                                                                                             | 14  |  |
| Total score attained for <i>Management Issues</i>   |                                                                                                                                                             | 14  |  |
| Weight for <i>Management Issues</i>                 |                                                                                                                                                             | 0.1 |  |
| Total weighted score for <i>Management Issues</i>   |                                                                                                                                                             | 0.1 |  |

| NON-TECHNICAL COMPLIANCE (MANAGEMENT) SCORING: Table 9.3 |                                                                                                                                                 |        |       |
|----------------------------------------------------------|-------------------------------------------------------------------------------------------------------------------------------------------------|--------|-------|
| Criterion                                                |                                                                                                                                                 | Yes =1 | No =0 |
| <b>2. NON-TECHNICAL ASSESSMENT</b>                       |                                                                                                                                                 |        |       |
| <b>2B: Management Practices</b>                          |                                                                                                                                                 |        |       |
|                                                          | Do the WSPs use existing local (Emanti/DWAF) or international management practices? Are they implementing them in their water treatment plants? | 1      |       |
|                                                          | Are the WSPs able to understand the existing local or international practices and implementing them correctly?                                  | 1      |       |
|                                                          | When local or international practices are not available, are the WSPs able to draw their own criteria?                                          | 1      |       |
| Maximum possible score for <i>Management Practices</i>   |                                                                                                                                                 | 3      |       |
| Total score attained for <i>Management Practices</i>     |                                                                                                                                                 | 3      |       |
| Weight for <i>Management Practices</i>                   |                                                                                                                                                 | 0.2    |       |
| Total weighted score for <i>Management Practices</i>     |                                                                                                                                                 | 0.2    |       |

| NON-TECHNICAL COMPLIANCE (MANAGEMENT) SCORING: Table 9.4 |         |        |
|----------------------------------------------------------|---------|--------|
| Criterion                                                | Yes = 1 | No = 0 |
| <b>2. NON-TECHNICAL ASSESSMENT</b>                       |         |        |

| 2C: Human Resources         |                                                                                                             |   |   |
|-----------------------------|-------------------------------------------------------------------------------------------------------------|---|---|
| Personnel at the plant      | Is the number of personnel related to the size of the plant?                                                |   | 0 |
|                             | Are the needs of process controllers/supervisors and shift workers per plants adequate?                     |   | 0 |
|                             | Are there specific guidelines/rules for shift workers and their deployment?                                 | 1 |   |
|                             | How many operators are there in total? How many shift workers?                                              | 1 |   |
| Qualifications of Personnel | How many operators with qualifications in the DWAF categories?                                              | 1 |   |
|                             | Are personnel being correctly applied according to their qualifications?                                    | 1 |   |
|                             | Are there guidelines or formal rules for upgrading of qualifications?                                       | 1 |   |
| Training Needs              | Are there in service training programmes and policies? What is the in-service training policy of the WSA?   | 1 |   |
|                             | Do process controllers / supervisors / managers know what training opportunities and courses are available? | 1 |   |
|                             | Are they sent on courses regularly?                                                                         | 1 |   |
|                             | Are there specific criteria or formal rules to be qualified for training?                                   | 1 |   |
|                             | Are there specific promotion requirement protocols in place?                                                | 1 |   |
|                             | Are there career advancement opportunities?                                                                 | 1 |   |
| Plant class                 | Is the plant classified by DWAF?                                                                            | 1 |   |
|                             | Has it been done according to the new classification system?                                                | 1 |   |
| Working Conditions          | Are the responsibilities of process controllers, supervisors and plant managers in line with their salary?  | 1 |   |
|                             | What system is used for overtime management and payment?                                                    | 1 |   |
|                             | What is the WSA policy on conflict management (internal and external)?                                      | 1 |   |
|                             | Is any medical assistance available for on the job injuries?                                                | 1 |   |
|                             | Can all workers participate in medical schemes?                                                             | 1 |   |
|                             | Are the retirement/pension-aid benefits, the housing and travel allowance benefits available?               | 1 |   |
|                             | Are the leave benefits (vacation /study/ sick), and the bonus scheme available?                             | 1 |   |
|                             | Are there any other incentives?                                                                             | 1 |   |
|                             | Are plant personnel satisfied with their working environment?                                               | 1 |   |
|                             | Are the relationships between supervisors and their subordinates good or poor?                              | 1 |   |
|                             | Is there any performance indicators?                                                                        | 1 |   |

|                                                   |       |
|---------------------------------------------------|-------|
| Maximum possible score for <i>Human Resources</i> | 27    |
| Total score attained for <i>Human Resources</i>   | 25    |
| Weight for <i>Human Resources</i>                 | 0.2   |
| Total weighted score for <i>Human Resources</i>   | 0.185 |

| NON-TECHNICAL COMPLIANCE (MANAGEMENT) SCORING: Table 9.5 |                                                                                                                                            |        |        |
|----------------------------------------------------------|--------------------------------------------------------------------------------------------------------------------------------------------|--------|--------|
| Criterion                                                |                                                                                                                                            | Yes =1 | No = 0 |
| <b>2. NON-TECHNICAL ASSESSMENT</b>                       |                                                                                                                                            |        |        |
| <b>2D: Financial Systems</b>                             |                                                                                                                                            |        |        |
| <b>Financial Systems Sharing in Place</b>                | Which financial systems are in place?                                                                                                      | 1      |        |
|                                                          | Are there sufficient funds for operation, maintenance and overtime?                                                                        | 1      |        |
|                                                          | Do the size of the plants (small versus large) influence the allocation of funds?                                                          | 1      |        |
|                                                          | Does the WSA's budgeting system work in relation to emergency funds, scheduled upgrading/extensions, unscheduled rehabilitation/upgrading? | 1      |        |
| <b>Information Sharing in Place</b>                      | Are there communication channels and transparency between the financial section and the water care section?                                | 1      |        |
|                                                          | Are regular meetings held? Who attends / chairs these meetings?                                                                            | 1      |        |
|                                                          | Are decisions taken at consensus / majority?                                                                                               | 1      |        |
|                                                          | Are reports freely available?                                                                                                              | 1      |        |
| <b>Procurement System</b>                                | Is the procurement system transparent?                                                                                                     | 1      |        |
|                                                          | Is the procurement system open to all?                                                                                                     | 1      |        |
|                                                          | Is the water sector involved in the adjudication of tenders?                                                                               | 1      |        |
| Maximum possible score for <i>Financial Systems</i>      |                                                                                                                                            | 11     |        |
| Total score attained for <i>Financial Systems</i>        |                                                                                                                                            | 11     |        |
| Weight for <i>Financial Systems</i>                      |                                                                                                                                            | 0.1    |        |
| Total weighted score for <i>Financial Systems</i>        |                                                                                                                                            | 0.1    |        |

| NON-TECHNICAL COMPLIANCE (MANAGEMENT) SCORING: Table 9.6       |                                                                                                               |            |        |
|----------------------------------------------------------------|---------------------------------------------------------------------------------------------------------------|------------|--------|
| Criterion                                                      |                                                                                                               | Yes =1     | No = 0 |
| <b>2. NON-TECHNICAL ASSESSMENT</b>                             |                                                                                                               |            |        |
| <b>2E: Communication Systems</b>                               |                                                                                                               |            |        |
| <b>Internal</b>                                                | Are there sufficient internal communication channels in place, including the needs and shortcomings?          | 1          |        |
|                                                                | Are these communication channels effective?                                                                   | 1          |        |
|                                                                | Is the communication between supervisors and process controllers good or poor?                                | 1          |        |
|                                                                | Is there any interaction between the maintenance team and the rest of personnel in the water treatment plant? | 1          |        |
|                                                                | Is the communication between management and lower level process controllers good or poor?                     | 1          |        |
| <b>External</b>                                                | Are there sufficient communication channels with other Municipalities and/or Departments?                     | 1          |        |
|                                                                | Are there sufficient communication channels with consumers?                                                   | 1          |        |
|                                                                | Are these external communication channels effective, good or poor?                                            | 1          |        |
| <b>Maximum possible score for <i>Communication Systems</i></b> |                                                                                                               | <b>8</b>   |        |
| <b>Total score attained for <i>Communication Systems</i></b>   |                                                                                                               | <b>8</b>   |        |
| <b>Weight for <i>Communication Systems</i></b>                 |                                                                                                               | <b>0.2</b> |        |
| <b>Total weighted score for <i>Communication Systems</i></b>   |                                                                                                               | <b>0.2</b> |        |

| NON-TECHNICAL COMPLIANCE (MANAGEMENT) SCORING: Table 9.7     |                                                                                                            |        |        |
|--------------------------------------------------------------|------------------------------------------------------------------------------------------------------------|--------|--------|
| Criterion                                                    |                                                                                                            | Yes =1 | No = 0 |
| <b>2. NON-TECHNICAL ASSESSMENT</b>                           |                                                                                                            |        |        |
| <b>2F: Audit of safety, health and environmental quality</b> |                                                                                                            |        |        |
| <b>Safety Matters</b>                                        | Are there water and safety management procedures for normal operation, incidents and emergency situations? | 1      |        |
|                                                              | Is there any safety plan at water treatment plants including the safety of process controllers on duties?  | 1      |        |
|                                                              | Are there emergency plans in place for chlorine leaks?                                                     | 1      |        |

|                                 |                                                                                                                                                         |      |  |
|---------------------------------|---------------------------------------------------------------------------------------------------------------------------------------------------------|------|--|
|                                 | Are there hazardous chemicals and ablution facilities, appropriate fire extinguishers location?                                                         | 1    |  |
|                                 | Are safety meetings held regularly and who attends such meetings?                                                                                       | 1    |  |
| Health Aspects                  | Are there representatives for health and safety of consumers? If yes, are they effective?                                                               | 1    |  |
|                                 | Are there control measures that identify risks and ensure that health based-targets are met in terms of providing safe drinking water to all consumers? | 1    |  |
|                                 | Are there emergency measures in place for water quality health impact?                                                                                  | 1    |  |
| Environmental Quality           | Are process controllers satisfied with their working environment?                                                                                       | 1    |  |
|                                 | Is the working environment appropriate for improving or accelerating the service delivery?                                                              | 1    |  |
|                                 | Is there any strategic plan to improve the quality of the working environment?                                                                          | 1    |  |
| Maximum possible score for SHEQ |                                                                                                                                                         | 11   |  |
| Total score attained for SHEQ   |                                                                                                                                                         | 11   |  |
| Weight for SHEQ                 |                                                                                                                                                         | 0.15 |  |
| Total weighted score for SHEQ   |                                                                                                                                                         | 0.15 |  |

| NON-TECHNICAL COMPLIANCE (MANAGEMENT) SCORING: Table 9.8 |                                                                                                                                                                 |        |        |
|----------------------------------------------------------|-----------------------------------------------------------------------------------------------------------------------------------------------------------------|--------|--------|
| Criterion                                                |                                                                                                                                                                 | Yes =1 | No = 0 |
| <b>2. NON-TECHNICAL ASSESSMENT</b>                       |                                                                                                                                                                 |        |        |
| <b>2G: Community involvement and awareness</b>           |                                                                                                                                                                 |        |        |
| Community Involvement                                    | Are there protocols involved communities in decision-making?                                                                                                    |        | 0      |
|                                                          | Is there an effective reporting system for communities to assist in more rapid response to any water quality incident?                                          | 1      |        |
|                                                          | Is there a Consumer Service to which non-compliance can be reported?                                                                                            | 1      |        |
| Community Awareness                                      | Is there a mechanism system to receive and actively address community complaints in a timely fashion?                                                           | 1      |        |
|                                                          | Are there procedures for promptly advising of any significant incidents within the drinking water supply including notification of the public health authority? | 1      |        |
|                                                          | Is there any water quality information system available to consumers through annual reports and in the internet?                                                | 1      |        |



|                                                         |       |
|---------------------------------------------------------|-------|
| Maximum possible score for <i>Community Involvement</i> | 6     |
| Total score attained for <i>Community Involvement</i>   | 5     |
| Weight for <i>Community Involvement</i>                 | 0.05  |
| Total weighted score for <i>Community Involvement</i>   | 0.042 |

| TABLE 9.9                                                        |                |
|------------------------------------------------------------------|----------------|
| NON-TECHNICAL (MANAGEMENT) COMPLIANCE SCORING:                   |                |
| Total Weighted Scoring for Mutshedzi package plant <u>97.7 %</u> |                |
| Compliance Criterion                                             | Weighted Score |
| <b>2. NON-TECHNICAL ASSESSMENT</b>                               |                |
| <b>2A: Management Issues</b>                                     | <b>0.1</b>     |
| <b>2B: Management Practices</b>                                  | <b>0.2</b>     |
| <b>2C: Human Resources</b>                                       | <b>0.185</b>   |
| <b>2D: Financial Systems</b>                                     | <b>0.1</b>     |
| <b>2E: Communication Systems</b>                                 | <b>0.2</b>     |
| <b>2F: Safety, Health and Environmental Quality</b>              | <b>0.15</b>    |
| <b>2G: Community Involvement and Awareness</b>                   | <b>0.042</b>   |
| <b>TOTAL WEIGHTED SCORE</b>                                      | <b>97.7</b>    |

| TABLE 9.10                                    |                                                                                                       |
|-----------------------------------------------|-------------------------------------------------------------------------------------------------------|
| NON-TECHNICAL (MANAGEMENT) COMPLIANCE RATING: |                                                                                                       |
| Total Weighted Score                          | Rating Description                                                                                    |
| 0 – 50                                        | <i>Class 3 Compliance:</i><br>Total non-compliance; serious and immediate intervention required (TAC) |
| 50 – 90                                       | <i>Class 2 Compliance:</i><br>Serious challenges requiring attention and improvement                  |
| 90 – 100                                      | <i>Class 1 Compliance:</i><br>Acceptable compliance                                                   |

| TABLE 10.1                                          |             |
|-----------------------------------------------------|-------------|
| NON-TECHNICAL (MANAGEMENT) COMPLIANCE SCORING       |             |
| Criterion                                           | Weight      |
| <b>2. NON-TECHNICAL ASSESSMENT</b>                  |             |
| <b>2A: Management Issues</b>                        | <b>0.1</b>  |
| <b>2B: Management Practices</b>                     | <b>0.2</b>  |
| <b>2C: Human Resources</b>                          | <b>0.2</b>  |
| <b>2D: Financial Systems</b>                        | <b>0.1</b>  |
| <b>2E: Communication Systems</b>                    | <b>0.2</b>  |
| <b>2F: Safety, Health and Environmental Quality</b> | <b>0.15</b> |
| <b>2G: Community Involvement and Awareness</b>      | <b>0.05</b> |
| <b>TOTAL</b>                                        | <b>1.0</b>  |

| NON-TECHNICAL COMPLIANCE (MANAGEMENT) SCORING: Table 10.2 |                                                                                                                                                                |          |        |
|-----------------------------------------------------------|----------------------------------------------------------------------------------------------------------------------------------------------------------------|----------|--------|
| Criterion                                                 |                                                                                                                                                                | Yes =1   | No = 0 |
| <b>2. NON-TECHNICAL ASSESSMENT</b>                        |                                                                                                                                                                |          |        |
| <b>2A: Management Issues</b>                              |                                                                                                                                                                |          |        |
| <b>Assessment of strategic plans</b>                      | Does a strategic plan for the assessment of drinking water supply systems exist?                                                                               | <b>1</b> |        |
|                                                           | Are there preventive strategic plans for drinking water quality management?                                                                                    | <b>1</b> |        |
|                                                           | Is there a strategic plan for recruitment of personnel per water treatment plant available?                                                                    | <b>1</b> |        |
|                                                           | Is there a strategic plan for operational monitoring and verification of drinking water system?                                                                | <b>1</b> |        |
|                                                           | Is there a strategic plan for sharing and clarifying roles and responsibilities among all personnel involved in the production of safe drinking water quality? | <b>1</b> |        |
|                                                           | Does a strategic plan for training and development of water plant personnel, and for community involvement and awareness exist?                                | <b>1</b> |        |

|                                                     |                                                                                                                                                             |     |  |
|-----------------------------------------------------|-------------------------------------------------------------------------------------------------------------------------------------------------------------|-----|--|
|                                                     | Is there any funding strategic plan for implementation of drinking water quality management programmes?                                                     | 1   |  |
| Assm of tact plans                                  | Does a tactical plan for handling emergencies including communication of such emergencies to communities exist?                                             | 1   |  |
|                                                     | Is the overall periodic overseeing of water care function performed?                                                                                        | 1   |  |
|                                                     | Is there maintenance and asset management plans?                                                                                                            | 1   |  |
| Assessment of operational plans                     | Is the attendance of process controllers (and in particular shift workers) at the treatment plant monitored? Is there a clock-in-system for the attendance? | 1   |  |
|                                                     | Is the superintendent available to operators on a day-to-day basis?                                                                                         | 1   |  |
|                                                     | Is there a substitute system plan put in place when one of the operators is ill or away attending a course?                                                 | 1   |  |
|                                                     | Are the supervisors and process controllers aware of their job requirements? Are job descriptions available?                                                | 1   |  |
| Maximum possible score for <i>Management Issues</i> |                                                                                                                                                             | 14  |  |
| Total score attained for <i>Management Issues</i>   |                                                                                                                                                             | 14  |  |
| Weight for <i>Management Issues</i>                 |                                                                                                                                                             | 0.1 |  |
| Total weighted score for <i>Management Issues</i>   |                                                                                                                                                             | 0.1 |  |

| NON-TECHNICAL COMPLIANCE (MANAGEMENT) SCORING: Table 10.3 |                                                                                                                                                 |        |        |
|-----------------------------------------------------------|-------------------------------------------------------------------------------------------------------------------------------------------------|--------|--------|
| Criterion                                                 |                                                                                                                                                 | Yes =1 | No = 0 |
| <b>2. NON-TECHNICAL ASSESSMENT</b>                        |                                                                                                                                                 |        |        |
| <b>2B: Management Practices</b>                           |                                                                                                                                                 |        |        |
|                                                           | Do the WSPs use existing local (Emanti/DWAF) or international management practices? Are they implementing them in their water treatment plants? | 1      |        |
|                                                           | Are the WPSs able to understand the existing local or international practices and implementing them correctly?                                  | 1      |        |
|                                                           | When local or international practices are not available, are the WSPs able to draw their own criteria?                                          | 1      |        |
| Maximum possible score for <i>Management Practices</i>    |                                                                                                                                                 | 3      |        |
| Total score attained for <i>Management Practices</i>      |                                                                                                                                                 | 3      |        |
| Weight for <i>Management Practices</i>                    |                                                                                                                                                 | 0.2    |        |

|                                                      |     |
|------------------------------------------------------|-----|
| Total weighted score for <i>Management Practices</i> | 0.2 |
|------------------------------------------------------|-----|

| NON-TECHNICAL COMPLIANCE (MANAGEMENT) SCORING: Table 10.4 |                                                                                                             |        |        |
|-----------------------------------------------------------|-------------------------------------------------------------------------------------------------------------|--------|--------|
| Criterion                                                 |                                                                                                             | Yes =1 | No = 0 |
| <b>2. NON-TECHNICAL ASSESSMENT</b>                        |                                                                                                             |        |        |
| <b>2C: Human Resources</b>                                |                                                                                                             |        |        |
| Personnel at the plant                                    | Is the number of personnel related to the size of the plant?                                                |        | 0      |
|                                                           | Are the needs of process controllers/supervisors and shift workers per plants adequate?                     |        | 0      |
|                                                           | Are there specific guidelines/rules for shift workers and their deployment?                                 | 1      |        |
|                                                           | How many operators are there in total? How many shift workers?                                              | 1      |        |
| Qualifications of Personnel                               | How many operators with qualifications in the DWAF categories?                                              | 1      |        |
|                                                           | Are personnel being correctly applied according to their qualifications?                                    | 1      |        |
|                                                           | Are there guidelines or formal rules for upgrading of qualifications?                                       | 1      |        |
| Training Needs                                            | Are there in service training programmes and policies? What is the in-service training policy of the WSA?   | 1      |        |
|                                                           | Do process controllers / supervisors / managers know what training opportunities and courses are available? | 1      |        |
|                                                           | Are they sent on courses regularly?                                                                         | 1      |        |
|                                                           | Are there specific criteria or formal rules to be qualified for training?                                   | 1      |        |
|                                                           | Are there specific promotion requirement protocols in place?                                                | 1      |        |
|                                                           | Are there career advancement opportunities?                                                                 | 1      |        |
| Plant class                                               | Is the plant classified by DWAF?                                                                            | 1      |        |
|                                                           | Has it been done according to the new classification system?                                                | 1      |        |
| Working Conditions                                        | Are the responsibilities of process controllers, supervisors and plant managers in line with their salary?  | 1      |        |
|                                                           | What system is used for overtime management and payment?                                                    | 1      |        |
|                                                           | What is the WSA policy on conflict management (internal and external)?                                      | 1      |        |
|                                                           | Is any medical assistance available for on the job injuries?                                                | 1      |        |
|                                                           | Can all workers participate in medical schemes?                                                             | 1      |        |

|                                                          |                                                                                               |              |  |
|----------------------------------------------------------|-----------------------------------------------------------------------------------------------|--------------|--|
|                                                          | Are the retirement/pension-aid benefits, the housing and travel allowance benefits available? | 1            |  |
|                                                          | Are the leave benefits (vacation /study/ sick), and the bonus scheme available?               | 1            |  |
|                                                          | Are there any other incentives?                                                               | 1            |  |
|                                                          | Are plant personnel satisfied with their working environment?                                 | 1            |  |
|                                                          | Are the relationships between supervisors and their subordinates good or poor?                | 1            |  |
|                                                          | Is there any performance indicators?                                                          | 1            |  |
| <b>Maximum possible score for <i>Human Resources</i></b> |                                                                                               | <b>27</b>    |  |
| <b>Total score attained for <i>Human Resources</i></b>   |                                                                                               | <b>25</b>    |  |
| <b>Weight for <i>Human Resources</i></b>                 |                                                                                               | <b>0.2</b>   |  |
| <b>Total weighted score for <i>Human Resources</i></b>   |                                                                                               | <b>0.185</b> |  |

| NON-TECHNICAL COMPLIANCE (MANAGEMENT) SCORING: Table 10.5 |                                                                                                                                            |        |        |
|-----------------------------------------------------------|--------------------------------------------------------------------------------------------------------------------------------------------|--------|--------|
| Criterion                                                 |                                                                                                                                            | Yes =1 | No = 0 |
| <b>2. NON-TECHNICAL ASSESSMENT</b>                        |                                                                                                                                            |        |        |
| <b>2D: Financial Systems</b>                              |                                                                                                                                            |        |        |
| <b>Financial Systems Sharing in Place</b>                 | Which financial systems are in place?                                                                                                      | 1      |        |
|                                                           | Are there sufficient funds for operation, maintenance and overtime?                                                                        | 1      |        |
|                                                           | Do the size of the plants (small versus large) influence the allocation of funds?                                                          | 1      |        |
|                                                           | Does the WSA's budgeting system work in relation to emergency funds, scheduled upgrading/extensions, unscheduled rehabilitation/upgrading? | 1      |        |
| <b>Information Sharing in Place</b>                       | Are there communication channels and transparency between the financial section and the water care section?                                | 1      |        |
|                                                           | Are regular meetings held? Who attends / chairs these meetings?                                                                            | 1      |        |
|                                                           | Are decisions taken at consensus / majority?                                                                                               | 1      |        |
|                                                           | Are reports freely available?                                                                                                              | 1      |        |
| <b>Procurement System</b>                                 | Is the procurement system transparent?                                                                                                     | 1      |        |
|                                                           | Is the procurement system open to all?                                                                                                     | 1      |        |

|                                                            |                                                              |            |  |
|------------------------------------------------------------|--------------------------------------------------------------|------------|--|
|                                                            | Is the water sector involved in the adjudication of tenders? | 1          |  |
| <b>Maximum possible score for <i>Financial Systems</i></b> |                                                              | <b>11</b>  |  |
| <b>Total score attained for <i>Financial Systems</i></b>   |                                                              | <b>11</b>  |  |
| <b>Weight for <i>Financial Systems</i></b>                 |                                                              | <b>0.1</b> |  |
| <b>Total weighted score for <i>Financial Systems</i></b>   |                                                              | <b>0.1</b> |  |

| <b>NON-TECHNICAL COMPLIANCE (MANAGEMENT) SCORING: Table 10.6</b> |                                                                                                               |               |               |
|------------------------------------------------------------------|---------------------------------------------------------------------------------------------------------------|---------------|---------------|
| <b>Criterion</b>                                                 |                                                                                                               | <b>Yes =1</b> | <b>No = 0</b> |
| <b>2. NON-TECHNICAL ASSESSMENT</b>                               |                                                                                                               |               |               |
| <b>2E: Communication Systems</b>                                 |                                                                                                               |               |               |
| <b>Internal</b>                                                  | Are there sufficient internal communication channels in place, including the needs and shortcomings?          | 1             |               |
|                                                                  | Are these communication channels effective?                                                                   | 1             |               |
|                                                                  | Is the communication between supervisors and process controllers good or poor?                                | 1             |               |
|                                                                  | Is there any interaction between the maintenance team and the rest of personnel in the water treatment plant? | 1             |               |
|                                                                  | Is the communication between management and lower level process controllers good or poor?                     | 1             |               |
| <b>External</b>                                                  | Are there sufficient communication channels with other Municipalities and/or Departments?                     | 1             |               |
|                                                                  | Are there sufficient communication channels with consumers?                                                   | 1             |               |
|                                                                  | Are these external communication channels effective, good or poor?                                            | 1             |               |
| <b>Maximum possible score for <i>Communication Systems</i></b>   |                                                                                                               | <b>8</b>      |               |
| <b>Total score attained for <i>Communication Systems</i></b>     |                                                                                                               | <b>8</b>      |               |
| <b>Weight for <i>Communication Systems</i></b>                   |                                                                                                               | <b>0.2</b>    |               |
| <b>Total weighted score for <i>Communication Systems</i></b>     |                                                                                                               | <b>0.2</b>    |               |

| NON-TECHNICAL COMPLIANCE (MANAGEMENT) SCORING: Table 10.7    |                                                                                                                                                         |        |        |
|--------------------------------------------------------------|---------------------------------------------------------------------------------------------------------------------------------------------------------|--------|--------|
| Criterion                                                    |                                                                                                                                                         | Yes =1 | No = 0 |
| <b>2. NON-TECHNICAL ASSESSMENT</b>                           |                                                                                                                                                         |        |        |
| <b>2F: Audit of safety, health and environmental quality</b> |                                                                                                                                                         |        |        |
| Safety Matters                                               | Are there water and safety management procedures for normal operation, incidents and emergency situations?                                              | 1      |        |
|                                                              | Is there any safety plan at water treatment plants including the safety of process controllers on duties?                                               | 1      |        |
|                                                              | Are there emergency plans in place for chlorine leaks?                                                                                                  | 1      |        |
|                                                              | Are there hazardous chemicals and ablution facilities, appropriate fire extinguishers location?                                                         | 1      |        |
|                                                              | Are safety meetings held regularly and who attends such meetings?                                                                                       | 1      |        |
| Health Aspects                                               | Are there representatives for health and safety of consumers? If yes, are they effective?                                                               | 1      |        |
|                                                              | Are there control measures that identify risks and ensure that health based-targets are met in terms of providing safe drinking water to all consumers? | 1      |        |
|                                                              | Are there emergency measures in place for water quality health impact?                                                                                  | 1      |        |
| Environmental Quality                                        | Are process controllers satisfied with their working environment?                                                                                       | 1      |        |
|                                                              | Is the working environment appropriate for improving or accelerating the service delivery?                                                              | 1      |        |
|                                                              | Is there any strategic plan to improve the quality of the working environment?                                                                          | 1      |        |
| Maximum possible score for <i>SHEQ</i>                       |                                                                                                                                                         | 11     |        |
| Total score attained for <i>SHEQ</i>                         |                                                                                                                                                         | 11     |        |
| Weight for <i>SHEQ</i>                                       |                                                                                                                                                         | 0.15   |        |
| Total weighted score for <i>SHEQ</i>                         |                                                                                                                                                         | 0.15   |        |

| NON-TECHNICAL COMPLIANCE (MANAGEMENT) SCORING: Table 10.8 |        |        |
|-----------------------------------------------------------|--------|--------|
| Criterion                                                 | Yes =1 | No = 0 |
| <b>2. NON-TECHNICAL ASSESSMENT</b>                        |        |        |
| <b>2G: Community involvement and awareness</b>            |        |        |

|                                                         |                                                                                                                                                                 |       |   |
|---------------------------------------------------------|-----------------------------------------------------------------------------------------------------------------------------------------------------------------|-------|---|
| Community Involvement                                   | Are there protocols involved communities in decision-making?                                                                                                    |       | 0 |
|                                                         | Is there an effective reporting system for communities to assist in more rapid response to any water quality incident?                                          | 1     |   |
|                                                         | Is there a Consumer Service to which non-compliance can be reported?                                                                                            | 1     |   |
| Community Awareness                                     | Is there a mechanism system to receive and actively address community complaints in a timely fashion?                                                           | 1     |   |
|                                                         | Are there procedures for promptly advising of any significant incidents within the drinking water supply including notification of the public health authority? | 1     |   |
|                                                         | Is there any water quality information system available to consumers through annual reports and in the internet?                                                | 1     |   |
| Maximum possible score for <i>Community Involvement</i> |                                                                                                                                                                 | 6     |   |
| Total score attained for <i>Community Involvement</i>   |                                                                                                                                                                 | 5     |   |
| Weight for <i>Community Involvement</i>                 |                                                                                                                                                                 | 0.05  |   |
| Total weighted score for <i>Community Involvement</i>   |                                                                                                                                                                 | 0.042 |   |

| TABLE 10.9                                                           |                |
|----------------------------------------------------------------------|----------------|
| NON-TECHNICAL (MANAGEMENT) COMPLIANCE SCORING:                       |                |
| Total Weighted Scoring for Mutale Regional Water Plant <u>97.7 %</u> |                |
| Compliance Criterion                                                 | Weighted Score |
| <b>2. NON-TECHNICAL ASSESSMENT</b>                                   |                |
| <b>2A: Management Issues</b>                                         | <b>0.1</b>     |
| <b>2B: Management Practices</b>                                      | <b>0.2</b>     |
| <b>2C: Human Resources</b>                                           | <b>0.185</b>   |
| <b>2D: Financial Systems</b>                                         | <b>0.1</b>     |
| <b>2E: Communication Systems</b>                                     | <b>0.2</b>     |
| <b>2F: Safety, Health and Environmental Quality</b>                  | <b>0.15</b>    |
| <b>2G: Community Involvement and Awareness</b>                       | <b>0.042</b>   |
| <b>TOTAL WEIGHTED SCORE</b>                                          | <b>97.7</b>    |

| TABLE 10.10                                   |
|-----------------------------------------------|
| NON-TECHNICAL (MANAGEMENT) COMPLIANCE RATING: |



| Total Weighted Score | Rating Description                                                                                    |
|----------------------|-------------------------------------------------------------------------------------------------------|
| 0 – 50               | <i>Class 3 Compliance:</i><br>Total non-compliance; serious and immediate intervention required (TAC) |
| 50 – 90              | <i>Class 2 Compliance:</i><br>Serious challenges requiring attention and improvement                  |
| 90 – 100             | <i>Class 1 Compliance:</i><br>Acceptable compliance                                                   |

# TSHEDZA PACKAGE PLANT

12 May 2011

| TABLE 11.1<br>NON-TECHNICAL (MANAGEMENT) COMPLIANCE SCORING |            |
|-------------------------------------------------------------|------------|
| Criterion                                                   | Weight     |
| <b>2. NON-TECHNICAL ASSESSMENT</b>                          |            |
| 2A: Management Issues                                       | 0.1        |
| 2B: Management Practices                                    | 0.2        |
| 2C: Human Resources                                         | 0.2        |
| 2D: Financial Systems                                       | 0.1        |
| 2E: Communication Systems                                   | 0.2        |
| 2F: Safety, Health and Environmental Quality                | 0.15       |
| 2G: Community Involvement and Awareness                     | 0.05       |
| <b>TOTAL</b>                                                | <b>1.0</b> |

| NON-TECHNICAL COMPLIANCE (MANAGEMENT) SCORING: Table 11.2                        |  |        |        |
|----------------------------------------------------------------------------------|--|--------|--------|
| Criterion                                                                        |  | Yes =1 | No = 0 |
| <b>2. NON-TECHNICAL ASSESSMENT</b>                                               |  |        |        |
| <b>2A: Management Issues</b>                                                     |  |        |        |
| Does a strategic plan for the assessment of drinking water supply systems exist? |  | 1      |        |

|                                                     |                                                                                                                                                                |       |   |
|-----------------------------------------------------|----------------------------------------------------------------------------------------------------------------------------------------------------------------|-------|---|
|                                                     | Are there preventive strategic plans for drinking water quality management?                                                                                    | 1     |   |
|                                                     | Is there a strategic plan for recruitment of personnel per water treatment plant available?                                                                    | 1     |   |
|                                                     | Is there a strategic plan for operational monitoring and verification of drinking water system?                                                                | 1     |   |
|                                                     | Is there a strategic plan for sharing and clarifying roles and responsibilities among all personnel involved in the production of safe drinking water quality? | 1     |   |
|                                                     | Does a strategic plan for training and development of water plant personnel, and for community involvement and awareness exist?                                | 1     |   |
|                                                     | Is there any funding strategic plan for implementation of drinking water quality management programmes?                                                        | 1     |   |
| Assm of tact plans                                  | Does a tactical plan for handling emergencies including communication of such emergencies to communities exist?                                                | 1     |   |
|                                                     | Is the overall periodic overseeing of water care function performed?                                                                                           | 1     |   |
|                                                     | Is there maintenance and asset management plans?                                                                                                               |       | 0 |
| Assessment of operational plans                     | Is the attendance of process controllers (and in particular shift workers) at the treatment plant monitored? Is there a clock-in-system for the attendance?    | 1     |   |
|                                                     | Is the superintendent available to operators on a day-to-day basis?                                                                                            | 1     |   |
|                                                     | Is there a substitute system plan put in place when one of the operators is ill or away attending a course?                                                    | 1     |   |
|                                                     | Are the supervisors and process controllers aware of their job requirements? Are job descriptions available?                                                   | 1     |   |
| Maximum possible score for <i>Management Issues</i> |                                                                                                                                                                | 14    |   |
| Total score attained for <i>Management Issues</i>   |                                                                                                                                                                | 13    |   |
| Weight for <i>Management Issues</i>                 |                                                                                                                                                                | 0.1   |   |
| Total weighted score for <i>Management Issues</i>   |                                                                                                                                                                | 0.093 |   |

| NON-TECHNICAL COMPLIANCE (MANAGEMENT) SCORING: Table 11.3                                                                     |        |        |
|-------------------------------------------------------------------------------------------------------------------------------|--------|--------|
| Criterion                                                                                                                     | Yes =1 | No = 0 |
| <b>2. NON-TECHNICAL ASSESSMENT</b>                                                                                            |        |        |
| <b>2B: Management Practices</b>                                                                                               |        |        |
| Do the WSPs use existing local (Emanti/DWAF) or international management practices? Are they implementing them in their water | 1      |        |

|                                                               |                                                                                                                |            |  |
|---------------------------------------------------------------|----------------------------------------------------------------------------------------------------------------|------------|--|
|                                                               | treatment plants?                                                                                              |            |  |
|                                                               | Are the WPSs able to understand the existing local or international practices and implementing them correctly? | 1          |  |
|                                                               | When local or international practices are not available, are the WSPs able to draw their own criteria?         | 1          |  |
| <b>Maximum possible score for <i>Management Practices</i></b> |                                                                                                                | <b>3</b>   |  |
| <b>Total score attained for <i>Management Practices</i></b>   |                                                                                                                | <b>3</b>   |  |
| <b>Weight for <i>Management Practices</i></b>                 |                                                                                                                | <b>0.2</b> |  |
| <b>Total weighted score for <i>Management Practices</i></b>   |                                                                                                                | <b>0.2</b> |  |

| NON-TECHNICAL COMPLIANCE (MANAGEMENT) SCORING: Table 11.4 |                                                                                                             |        |        |
|-----------------------------------------------------------|-------------------------------------------------------------------------------------------------------------|--------|--------|
| Criterion                                                 |                                                                                                             | Yes =1 | No = 0 |
| <b>2. NON-TECHNICAL ASSESSMENT</b>                        |                                                                                                             |        |        |
| <b>2C: Human Resources</b>                                |                                                                                                             |        |        |
| <b>Personnel at the plant</b>                             | Is the number of personnel related to the size of the plant?                                                |        | 0      |
|                                                           | Are the needs of process controllers/supervisors and shift workers per plants adequate?                     |        | 0      |
|                                                           | Are there specific guidelines/rules for shift workers and their deployment?                                 | 1      |        |
|                                                           | How many operators are there in total? How many shift workers?                                              | 1      |        |
| <b>Qualifications of Personnel</b>                        | How many operators with qualifications in the DWAF categories?                                              | 1      |        |
|                                                           | Are personnel being correctly applied according to their qualifications?                                    | 1      |        |
|                                                           | Are there guidelines or formal rules for upgrading of qualifications?                                       | 1      |        |
| <b>Training Needs</b>                                     | Are there in service training programmes and policies? What is the in-service training policy of the WSA?   | 1      |        |
|                                                           | Do process controllers / supervisors / managers know what training opportunities and courses are available? | 1      |        |
|                                                           | Are they sent on courses regularly?                                                                         | 1      |        |
|                                                           | Are there specific criteria or formal rules to be qualified for training?                                   | 1      |        |
|                                                           | Are there specific promotion requirement protocols in place?                                                | 1      |        |
|                                                           | Are there career advancement opportunities?                                                                 | 1      |        |
| <b>Plant Classification</b>                               | Is the plant classified by DWAF?                                                                            | 1      |        |

|                                                   |                                                                                                            |       |  |
|---------------------------------------------------|------------------------------------------------------------------------------------------------------------|-------|--|
|                                                   | Has it been done according to the new classification system?                                               | 1     |  |
| Working Conditions                                | Are the responsibilities of process controllers, supervisors and plant managers in line with their salary? | 1     |  |
|                                                   | What system is used for overtime management and payment?                                                   | 1     |  |
|                                                   | What is the WSA policy on conflict management (internal and external)?                                     | 1     |  |
|                                                   | Is any medical assistance available for on the job injuries?                                               | 1     |  |
|                                                   | Can all workers participate in medical schemes?                                                            | 1     |  |
|                                                   | Are the retirement/pension-aid benefits, the housing and travel allowance benefits available?              | 1     |  |
|                                                   | Are the leave benefits (vacation /study/ sick), and the bonus scheme available?                            | 1     |  |
|                                                   | Are there any other incentives?                                                                            | 1     |  |
|                                                   | Are plant personnel satisfied with their working environment?                                              | 1     |  |
|                                                   | Are the relationships between supervisors and their subordinates good or poor?                             | 1     |  |
|                                                   | Is there any performance indicators?                                                                       | 1     |  |
| Maximum possible score for <i>Human Resources</i> |                                                                                                            | 27    |  |
| Total score attained for <i>Human Resources</i>   |                                                                                                            | 25    |  |
| Weight for <i>Human Resources</i>                 |                                                                                                            | 0.2   |  |
| Total weighted score for <i>Human Resources</i>   |                                                                                                            | 0.185 |  |

| NON-TECHNICAL COMPLIANCE (MANAGEMENT) SCORING: Table 11.5 |                                                                                                                                            |        |        |
|-----------------------------------------------------------|--------------------------------------------------------------------------------------------------------------------------------------------|--------|--------|
| Criterion                                                 |                                                                                                                                            | Yes =1 | No = 0 |
| <b>2. NON-TECHNICAL ASSESSMENT</b>                        |                                                                                                                                            |        |        |
| <b>2D: Financial Systems</b>                              |                                                                                                                                            |        |        |
| Financial Systems Sharing in Place                        | Which financial systems are in place?                                                                                                      | 1      |        |
|                                                           | Are there sufficient funds for operation, maintenance and overtime?                                                                        | 1      |        |
|                                                           | Do the size of the plants (small versus large) influence the allocation of funds?                                                          | 1      |        |
|                                                           | Does the WSA's budgeting system work in relation to emergency funds, scheduled upgrading/extensions, unscheduled rehabilitation/upgrading? | 1      |        |

|                                                            |                                                                                                             |            |  |
|------------------------------------------------------------|-------------------------------------------------------------------------------------------------------------|------------|--|
| <b>Information Sharing in Place</b>                        | Are there communication channels and transparency between the financial section and the water care section? | 1          |  |
|                                                            | Are regular meetings held? Who attends / chairs these meetings?                                             | 1          |  |
|                                                            | Are decisions taken at consensus / majority?                                                                | 1          |  |
|                                                            | Are reports freely available?                                                                               | 1          |  |
| <b>Procurement System</b>                                  | Is the procurement system transparent?                                                                      | 1          |  |
|                                                            | Is the procurement system open to all?                                                                      | 1          |  |
|                                                            | Is the water sector involved in the adjudication of tenders?                                                | 1          |  |
| <b>Maximum possible score for <i>Financial Systems</i></b> |                                                                                                             | <b>11</b>  |  |
| <b>Total score attained for <i>Financial Systems</i></b>   |                                                                                                             | <b>11</b>  |  |
| <b>Weight for <i>Financial Systems</i></b>                 |                                                                                                             | <b>0.1</b> |  |
| <b>Total weighted score for <i>Financial Systems</i></b>   |                                                                                                             | <b>0.1</b> |  |

| <b>NON-TECHNICAL COMPLIANCE (MANAGEMENT) SCORING: Table 11.5</b> |                                                                                                                                            |               |               |
|------------------------------------------------------------------|--------------------------------------------------------------------------------------------------------------------------------------------|---------------|---------------|
| <b>Criterion</b>                                                 |                                                                                                                                            | <b>Yes =1</b> | <b>No = 0</b> |
| <b>2. NON-TECHNICAL ASSESSMENT</b>                               |                                                                                                                                            |               |               |
| <b>2D: Financial Systems</b>                                     |                                                                                                                                            |               |               |
| <b>Financial Systems Sharing in Place</b>                        | Which financial systems are in place?                                                                                                      | 1             |               |
|                                                                  | Are there sufficient funds for operation, maintenance and overtime?                                                                        | 1             |               |
|                                                                  | Do the size of the plants (small versus large) influence the allocation of funds?                                                          | 1             |               |
|                                                                  | Does the WSA's budgeting system work in relation to emergency funds, scheduled upgrading/extensions, unscheduled rehabilitation/upgrading? | 1             |               |
| <b>Information Sharing in Place</b>                              | Are there communication channels and transparency between the financial section and the water care section?                                | 1             |               |
|                                                                  | Are regular meetings held? Who attends / chairs these meetings?                                                                            | 1             |               |
|                                                                  | Are decisions taken at consensus / majority?                                                                                               | 1             |               |
|                                                                  | Are reports freely available?                                                                                                              | 1             |               |

|                                                            |                                                              |            |  |
|------------------------------------------------------------|--------------------------------------------------------------|------------|--|
| <b>Procurement System</b>                                  | Is the procurement system transparent?                       | <b>1</b>   |  |
|                                                            | Is the procurement system open to all?                       | <b>1</b>   |  |
|                                                            | Is the water sector involved in the adjudication of tenders? | <b>1</b>   |  |
| <b>Maximum possible score for <i>Financial Systems</i></b> |                                                              | <b>11</b>  |  |
| <b>Total score attained for <i>Financial Systems</i></b>   |                                                              | <b>11</b>  |  |
| <b>Weight for <i>Financial Systems</i></b>                 |                                                              | <b>0.1</b> |  |
| <b>Total weighted score for <i>Financial Systems</i></b>   |                                                              | <b>0.1</b> |  |

| <b>NON-TECHNICAL COMPLIANCE (MANAGEMENT) SCORING: Table 11.6</b> |                                                                                                               |               |               |
|------------------------------------------------------------------|---------------------------------------------------------------------------------------------------------------|---------------|---------------|
| <b>Criterion</b>                                                 |                                                                                                               | <b>Yes =1</b> | <b>No = 0</b> |
| <b>2. NON-TECHNICAL ASSESSMENT</b>                               |                                                                                                               |               |               |
| <b>2E: Communication Systems</b>                                 |                                                                                                               |               |               |
| <b>Internal</b>                                                  | Are there sufficient internal communication channels in place, including the needs and shortcomings?          | <b>1</b>      |               |
|                                                                  | Are these communication channels effective?                                                                   | <b>1</b>      |               |
|                                                                  | Is the communication between supervisors and process controllers good or poor?                                | <b>1</b>      |               |
|                                                                  | Is there any interaction between the maintenance team and the rest of personnel in the water treatment plant? | <b>1</b>      |               |
|                                                                  | Is the communication between management and lower level process controllers good or poor?                     | <b>1</b>      |               |
| <b>External</b>                                                  | Are there sufficient communication channels with other Municipalities and/or Departments?                     | <b>1</b>      |               |
|                                                                  | Are there sufficient communication channels with consumers?                                                   | <b>1</b>      |               |
|                                                                  | Are these external communication channels effective, good or poor?                                            | <b>1</b>      |               |
| <b>Maximum possible score for <i>Communication Systems</i></b>   |                                                                                                               | <b>8</b>      |               |
| <b>Total score attained for <i>Communication Systems</i></b>     |                                                                                                               | <b>8</b>      |               |
| <b>Weight for <i>Communication Systems</i></b>                   |                                                                                                               | <b>0.2</b>    |               |

|                                                       |     |
|-------------------------------------------------------|-----|
| Total weighted score for <i>Communication Systems</i> | 0.2 |
|-------------------------------------------------------|-----|

| NON-TECHNICAL COMPLIANCE (MANAGEMENT) SCORING: Table 11.7    |                                                                                                                                                          |        |        |
|--------------------------------------------------------------|----------------------------------------------------------------------------------------------------------------------------------------------------------|--------|--------|
| Criterion                                                    |                                                                                                                                                          | Yes =1 | No = 0 |
| <b>2. NON-TECHNICAL ASSESSMENT</b>                           |                                                                                                                                                          |        |        |
| <b>2F: Audit of safety, health and environmental quality</b> |                                                                                                                                                          |        |        |
| Safety Matters                                               | Are there water and safety management procedures for normal operation, incidents and emergency situations?                                               | 1      |        |
|                                                              | Is there any safety plan at water treatment plants including the safety of process controllers on duties?                                                | 1      |        |
|                                                              | Are there emergency plans in place for chlorine leaks?                                                                                                   | 1      |        |
|                                                              | Are there hazardous chemicals and ablution facilities, appropriate fire extinguishers location?                                                          | 1      |        |
|                                                              | Are safety meetings held regularly and who attends such meetings?                                                                                        | 1      |        |
| Health Aspects                                               | Are there representatives for health and safety of consumers? If yes, are they effective?                                                                | 1      |        |
|                                                              | Are there control measures that identify risks and ensure that health based- targets are met in terms of providing safe drinking water to all consumers? | 1      |        |
|                                                              | Are there emergency measures in place for water quality health impact?                                                                                   | 1      |        |
| Environmental Quality                                        | Are process controllers satisfied with their working environment?                                                                                        | 1      |        |
|                                                              | Is the working environment appropriate for improving or accelerating the service delivery?                                                               | 1      |        |
|                                                              | Is there any strategic plan to improve the quality of the working environment?                                                                           | 1      |        |
| Maximum possible score for <i>SHEQ</i>                       |                                                                                                                                                          | 11     |        |
| Total score attained for <i>SHEQ</i>                         |                                                                                                                                                          | 11     |        |
| Weight for <i>SHEQ</i>                                       |                                                                                                                                                          | 0.15   |        |
| Total weighted score for <i>SHEQ</i>                         |                                                                                                                                                          | 0.15   |        |

|                                                           |
|-----------------------------------------------------------|
| NON-TECHNICAL COMPLIANCE (MANAGEMENT) SCORING: Table 11.8 |
|-----------------------------------------------------------|

| Criterion                                               |                                                                                                                                                                 | Yes =1 | No = 0 |
|---------------------------------------------------------|-----------------------------------------------------------------------------------------------------------------------------------------------------------------|--------|--------|
| <b>2. NON-TECHNICAL ASSESSMENT</b>                      |                                                                                                                                                                 |        |        |
| <b>2G: Community involvement and awareness</b>          |                                                                                                                                                                 |        |        |
| Community Involvement                                   | Are there protocols involved communities in decision-making?                                                                                                    |        | 0      |
|                                                         | Is there an effective reporting system for communities to assist in more rapid response to any water quality incident?                                          |        | 0      |
|                                                         | Is there a Consumer Service to which non-compliance can be reported?                                                                                            | 1      |        |
| Community Awareness                                     | Is there a mechanism system to receive and actively address community complaints in a timely fashion?                                                           | 1      |        |
|                                                         | Are there procedures for promptly advising of any significant incidents within the drinking water supply including notification of the public health authority? | 1      |        |
|                                                         | Is there any water quality information system available to consumers through annual reports and in the internet?                                                | 1      |        |
| Maximum possible score for <i>Community Involvement</i> |                                                                                                                                                                 | 6      |        |
| Total score attained for <i>Community Involvement</i>   |                                                                                                                                                                 | 4      |        |
| Weight for <i>Community Involvement</i>                 |                                                                                                                                                                 | 0.05   |        |
| Total weighted score for <i>Community Involvement</i>   |                                                                                                                                                                 | 0.033  |        |

| TABLE 11.9                                                     |                |
|----------------------------------------------------------------|----------------|
| NON-TECHNICAL (MANAGEMENT) COMPLIANCE SCORING:                 |                |
| Total Weighted Scoring for Tshedza Package plant <u>96.1 %</u> |                |
| Compliance Criterion                                           | Weighted Score |
| <b>2. NON-TECHNICAL ASSESSMENT</b>                             |                |
| <b>2A: Management Issues</b>                                   | <b>0.093</b>   |
| <b>2B: Management Practices</b>                                | <b>0.2</b>     |
| <b>2C: Human Resources</b>                                     | <b>0.185</b>   |
| <b>2D: Financial Systems</b>                                   | <b>0.1</b>     |
| <b>2E: Communication Systems</b>                               | <b>0.2</b>     |
| <b>2F: Safety, Health and Environmental Quality</b>            | <b>0.15</b>    |
| <b>2G: Community Involvement and Awareness</b>                 | <b>0.033</b>   |



|                             |             |
|-----------------------------|-------------|
| <b>TOTAL WEIGHTED SCORE</b> | <b>96.1</b> |
|-----------------------------|-------------|

| <b>TABLE 11.10</b>                                   |                                                                                                       |
|------------------------------------------------------|-------------------------------------------------------------------------------------------------------|
| <b>NON-TECHNICAL (MANAGEMENT) COMPLIANCE RATING:</b> |                                                                                                       |
| <b>Total Weighted Score</b>                          | <b>Rating Description</b>                                                                             |
| <b>0 – 50</b>                                        | <i>Class 3 Compliance:</i><br>Total non-compliance; serious and immediate intervention required (TAC) |
| <b>50 – 90</b>                                       | <i>Class 2 Compliance:</i><br>Serious challenges requiring attention and improvement                  |
| <b>90 – 100</b>                                      | <i>Class 1 Compliance:</i><br>Acceptable compliance                                                   |

#### DZINGAHE PACKAGE PLANT

11 May 2011

| <b>TABLE 12.1</b>                                    |               |
|------------------------------------------------------|---------------|
| <b>NON-TECHNICAL (MANAGEMENT) COMPLIANCE SCORING</b> |               |
| <b>Criterion</b>                                     | <b>Weight</b> |
| <b>2. NON-TECHNICAL ASSESSMENT</b>                   |               |
| <b>2A: Management Issues</b>                         | <b>0.1</b>    |
| <b>2B: Management Practices</b>                      | <b>0.2</b>    |
| <b>2C: Human Resources</b>                           | <b>0.2</b>    |
| <b>2D: Financial Systems</b>                         | <b>0.1</b>    |
| <b>2E: Communication Systems</b>                     | <b>0.2</b>    |
| <b>2F: Safety, Health and Environmental Quality</b>  | <b>0.15</b>   |
| <b>2G: Community Involvement and Awareness</b>       | <b>0.05</b>   |
| <b>TOTAL</b>                                         | <b>1.0</b>    |

|                                                                  |
|------------------------------------------------------------------|
| <b>NON-TECHNICAL COMPLIANCE (MANAGEMENT) SCORING: Table 12.2</b> |
|------------------------------------------------------------------|

| Criterion                                           |                                                                                                                                                                | Yes =1 | No =0 |
|-----------------------------------------------------|----------------------------------------------------------------------------------------------------------------------------------------------------------------|--------|-------|
| <b>2. NON-TECHNICAL ASSESSMENT</b>                  |                                                                                                                                                                |        |       |
| <b>2A: Management Issues</b>                        |                                                                                                                                                                |        |       |
| Assessment of strategic plans                       | Does a strategic plan for the assessment of drinking water supply systems exist?                                                                               | 1      |       |
|                                                     | Are there preventive strategic plans for drinking water quality management?                                                                                    | 1      |       |
|                                                     | Is there a strategic plan for recruitment of personnel per water treatment plant available?                                                                    | 1      |       |
|                                                     | Is there a strategic plan for operational monitoring and verification of drinking water system?                                                                | 1      |       |
|                                                     | Is there a strategic plan for sharing and clarifying roles and responsibilities among all personnel involved in the production of safe drinking water quality? | 1      |       |
|                                                     | Does a strategic plan for training and development of water plant personnel, and for community involvement and awareness exist?                                | 1      |       |
|                                                     | Is there any funding strategic plan for implementation of drinking water quality management programmes?                                                        | 1      |       |
| Assm of tact plans                                  | Does a tactical plan for handling emergencies including communication of such emergencies to communities exist?                                                | 1      |       |
|                                                     | Is the overall periodic overseeing of water care function performed?                                                                                           | 1      |       |
|                                                     | Is there maintenance and asset management plans?                                                                                                               | 1      |       |
| Assessment of operational plans                     | Is the attendance of process controllers (and in particular shift workers) at the treatment plant monitored? Is there a clock-in-system for the attendance?    | 1      |       |
|                                                     | Is the superintendent available to operators on a day-to-day basis?                                                                                            | 1      |       |
|                                                     | Is there a substitute system plan put in place when one of the operators is ill or away attending a course?                                                    | 1      |       |
|                                                     | Are the supervisors and process controllers aware of their job requirements? Are job descriptions available?                                                   | 1      |       |
| Maximum possible score for <i>Management Issues</i> |                                                                                                                                                                | 14     |       |
| Total score attained for <i>Management Issues</i>   |                                                                                                                                                                | 14     |       |
| Weight for <i>Management Issues</i>                 |                                                                                                                                                                | 0.1    |       |
| Total weighted score for <i>Management Issues</i>   |                                                                                                                                                                | 0.1    |       |

| NON-TECHNICAL COMPLIANCE (MANAGEMENT) SCORING: Table 12.3 |                                                                                                                                                 |            |        |
|-----------------------------------------------------------|-------------------------------------------------------------------------------------------------------------------------------------------------|------------|--------|
| Criterion                                                 |                                                                                                                                                 | Yes =1     | No = 0 |
| <b>2. NON-TECHNICAL ASSESSMENT</b>                        |                                                                                                                                                 |            |        |
| <b>2B: Management Practices</b>                           |                                                                                                                                                 |            |        |
|                                                           | Do the WSPs use existing local (Emanti/DWAF) or international management practices? Are they implementing them in their water treatment plants? | 1          |        |
|                                                           | Are the WPSs able to understand the existing local or international practices and implementing them correctly?                                  | 1          |        |
|                                                           | When local or international practices are not available, are the WSPs able to draw their own criteria?                                          | 1          |        |
| <b>Maximum possible score for Management Practices</b>    |                                                                                                                                                 | <b>3</b>   |        |
| <b>Total score attained for Management Practices</b>      |                                                                                                                                                 | <b>3</b>   |        |
| <b>Weight for Management Practices</b>                    |                                                                                                                                                 | <b>0.2</b> |        |
| <b>Total weighted score for Management Practices</b>      |                                                                                                                                                 | <b>0.2</b> |        |

| NON-TECHNICAL COMPLIANCE (MANAGEMENT) SCORING: Table 12.4 |                                                                                                           |        |        |
|-----------------------------------------------------------|-----------------------------------------------------------------------------------------------------------|--------|--------|
| Criterion                                                 |                                                                                                           | Yes =1 | No = 0 |
| <b>2. NON-TECHNICAL ASSESSMENT</b>                        |                                                                                                           |        |        |
| <b>2C: Human Resources</b>                                |                                                                                                           |        |        |
| <b>Personnel at the plant</b>                             | Is the number of personnel related to the size of the plant?                                              |        | 0      |
|                                                           | Are the needs of process controllers/supervisors and shift workers per plants adequate?                   |        | 0      |
|                                                           | Are there specific guidelines/rules for shift workers and their deployment?                               | 1      |        |
|                                                           | How many operators are there in total? How many shift workers?                                            | 1      |        |
| <b>Qualifications of Personnel</b>                        | How many operators with qualifications in the DWAF categories?                                            | 1      |        |
|                                                           | Are personnel being correctly applied according to their qualifications?                                  | 1      |        |
|                                                           | Are there guidelines or formal rules for upgrading of qualifications?                                     | 1      |        |
| <b>Training Needs</b>                                     | Are there in service training programmes and policies? What is the in-service training policy of the WSA? | 1      |        |

|                                                   |                                                                                                             |       |   |
|---------------------------------------------------|-------------------------------------------------------------------------------------------------------------|-------|---|
|                                                   | Do process controllers / supervisors / managers know what training opportunities and courses are available? | 1     |   |
|                                                   | Are they sent on courses regularly?                                                                         | 1     |   |
|                                                   | Are there specific criteria or formal rules to be qualified for training?                                   | 1     |   |
|                                                   | Are there specific promotion requirement protocols in place?                                                | 1     |   |
|                                                   | Are there career advancement opportunities?                                                                 | 1     |   |
| Plant class                                       | Is the plant classified by DWAF?                                                                            | 1     |   |
|                                                   | Has it been done according to the new classification system?                                                | 1     |   |
| Working Conditions                                | Are the responsibilities of process controllers, supervisors and plant managers in line with their salary?  |       | 0 |
|                                                   | What system is used for overtime management and payment?                                                    | 1     |   |
|                                                   | What is the WSA policy on conflict management (internal and external)?                                      | 1     |   |
|                                                   | Is any medical assistance available for on the job injuries?                                                | 1     |   |
|                                                   | Can all workers participate in medical schemes?                                                             | 1     |   |
|                                                   | Are the retirement/pension-aid benefits, the housing and travel allowance benefits available?               | 1     |   |
|                                                   | Are the leave benefits (vacation /study/ sick), and the bonus scheme available?                             | 1     |   |
|                                                   | Are there any other incentives?                                                                             | 1     |   |
|                                                   | Are plant personnel satisfied with their working environment?                                               | 1     |   |
|                                                   | Are the relationships between supervisors and their subordinates good or poor?                              | 1     |   |
|                                                   | Is there any performance indicators?                                                                        | 1     |   |
| Maximum possible score for <i>Human Resources</i> |                                                                                                             | 27    |   |
| Total score attained for <i>Human Resources</i>   |                                                                                                             | 24    |   |
| Weight for <i>Human Resources</i>                 |                                                                                                             | 0.2   |   |
| Total weighted score for <i>Human Resources</i>   |                                                                                                             | 0.178 |   |

| NON-TECHNICAL COMPLIANCE (MANAGEMENT) SCORING: Table 12.5 |        |        |
|-----------------------------------------------------------|--------|--------|
| Criterion                                                 | Yes =1 | No = 0 |
| 2. NON-TECHNICAL ASSESSMENT                               |        |        |

| 2D: Financial Systems                               |                                                                                                                                            |     |  |
|-----------------------------------------------------|--------------------------------------------------------------------------------------------------------------------------------------------|-----|--|
| Financial Systems Sharing in Place                  | Which financial systems are in place?                                                                                                      | 1   |  |
|                                                     | Are there sufficient funds for operation, maintenance and overtime?                                                                        | 1   |  |
|                                                     | Do the size of the plants (small versus large) influence the allocation of funds?                                                          | 1   |  |
|                                                     | Does the WSA's budgeting system work in relation to emergency funds, scheduled upgrading/extensions, unscheduled rehabilitation/upgrading? | 1   |  |
| Information Sharing in Place                        | Are there communication channels and transparency between the financial section and the water care section?                                | 1   |  |
|                                                     | Are regular meetings held? Who attends / chairs these meetings?                                                                            | 1   |  |
|                                                     | Are decisions taken at consensus / majority?                                                                                               | 1   |  |
|                                                     | Are reports freely available?                                                                                                              | 1   |  |
| Procurement System                                  | Is the procurement system transparent?                                                                                                     | 1   |  |
|                                                     | Is the procurement system open to all?                                                                                                     | 1   |  |
|                                                     | Is the water sector involved in the adjudication of tenders?                                                                               | 1   |  |
| Maximum possible score for <i>Financial Systems</i> |                                                                                                                                            | 11  |  |
| Total score attained for <i>Financial Systems</i>   |                                                                                                                                            | 11  |  |
| Weight for <i>Financial Systems</i>                 |                                                                                                                                            | 0.1 |  |
| Total weighted score for <i>Financial Systems</i>   |                                                                                                                                            | 0.1 |  |

| NON-TECHNICAL COMPLIANCE (MANAGEMENT) SCORING: Table 12.6 |                                                                                                      |        |        |
|-----------------------------------------------------------|------------------------------------------------------------------------------------------------------|--------|--------|
| Criterion                                                 |                                                                                                      | Yes =1 | No = 0 |
| 2. NON-TECHNICAL ASSESSMENT                               |                                                                                                      |        |        |
| 2E: Communication Systems                                 |                                                                                                      |        |        |
| Internal                                                  | Are there sufficient internal communication channels in place, including the needs and shortcomings? | 1      |        |
|                                                           | Are these communication channels effective?                                                          | 1      |        |
|                                                           | Is the communication between supervisors and process controllers good or                             | 1      |        |

|                                                         |                                                                                                               |     |  |
|---------------------------------------------------------|---------------------------------------------------------------------------------------------------------------|-----|--|
|                                                         | poor?                                                                                                         |     |  |
|                                                         | Is there any interaction between the maintenance team and the rest of personnel in the water treatment plant? | 1   |  |
|                                                         | Is the communication between management and lower level process controllers good or poor?                     | 1   |  |
| External                                                | Are there sufficient communication channels with other Municipalities and/or Departments?                     | 1   |  |
|                                                         | Are there sufficient communication channels with consumers?                                                   | 1   |  |
|                                                         | Are these external communication channels effective, good or poor?                                            | 1   |  |
| Maximum possible score for <i>Communication Systems</i> |                                                                                                               | 8   |  |
| Total score attained for <i>Communication Systems</i>   |                                                                                                               | 8   |  |
| Weight for <i>Communication Systems</i>                 |                                                                                                               | 0.2 |  |
| Total weighted score for <i>Communication Systems</i>   |                                                                                                               | 0.2 |  |

| NON-TECHNICAL COMPLIANCE (MANAGEMENT) SCORING: Table 12.7    |                                                                                                                                                         |        |       |
|--------------------------------------------------------------|---------------------------------------------------------------------------------------------------------------------------------------------------------|--------|-------|
| Criterion                                                    |                                                                                                                                                         | Yes =1 | No =0 |
| <b>2. NON-TECHNICAL ASSESSMENT</b>                           |                                                                                                                                                         |        |       |
| <b>2F: Audit of safety, health and environmental quality</b> |                                                                                                                                                         |        |       |
| Safety Matters                                               | Are there water and safety management procedures for normal operation, incidents and emergency situations?                                              | 1      |       |
|                                                              | Is there any safety plan at water treatment plants including the safety of process controllers on duties?                                               | 1      |       |
|                                                              | Are there emergency plans in place for chlorine leaks?                                                                                                  | 1      |       |
|                                                              | Are there hazardous chemicals and ablution facilities, appropriate fire extinguishers location?                                                         | 1      |       |
|                                                              | Are safety meetings held regularly and who attends such meetings?                                                                                       | 1      |       |
| Health Aspects                                               | Are there representatives for health and safety of consumers? If yes, are they effective?                                                               | 1      |       |
|                                                              | Are there control measures that identify risks and ensure that health based-targets are met in terms of providing safe drinking water to all consumers? | 1      |       |
|                                                              | Are there emergency measures in place for water quality health impact?                                                                                  | 1      |       |
| m<br>e<br>n<br>t<br>a<br>l                                   | Are process controllers satisfied with their working environment?                                                                                       | 1      |       |

|                                        |                                                                                            |             |  |
|----------------------------------------|--------------------------------------------------------------------------------------------|-------------|--|
|                                        | Is the working environment appropriate for improving or accelerating the service delivery? | 1           |  |
|                                        | Is there any strategic plan to improve the quality of the working environment?             | 1           |  |
| <b>Maximum possible score for SHEQ</b> |                                                                                            | <b>11</b>   |  |
| <b>Total score attained for SHEQ</b>   |                                                                                            | <b>11</b>   |  |
| <b>Weight for SHEQ</b>                 |                                                                                            | <b>0.15</b> |  |
| <b>Total weighted score for SHEQ</b>   |                                                                                            | <b>0.15</b> |  |

| NON-TECHNICAL COMPLIANCE (MANAGEMENT) SCORING: Table 12.8 |                                                                                                                                                                 |              |        |
|-----------------------------------------------------------|-----------------------------------------------------------------------------------------------------------------------------------------------------------------|--------------|--------|
| Criterion                                                 |                                                                                                                                                                 | Yes =1       | No = 0 |
| <b>2. NON-TECHNICAL ASSESSMENT</b>                        |                                                                                                                                                                 |              |        |
| <b>2G: Community involvement and awareness</b>            |                                                                                                                                                                 |              |        |
| <b>Community Involvement</b>                              | Are there protocols involved communities in decision-making?                                                                                                    |              | 0      |
|                                                           | Is there an effective reporting system for communities to assist in more rapid response to any water quality incident?                                          | 1            |        |
|                                                           | Is there a Consumer Service to which non-compliance can be reported?                                                                                            | 1            |        |
| <b>Community Awareness</b>                                | Is there a mechanism system to receive and actively address community complaints in a timely fashion?                                                           | 1            |        |
|                                                           | Are there procedures for promptly advising of any significant incidents within the drinking water supply including notification of the public health authority? | 1            |        |
|                                                           | Is there any water quality information system available to consumers through annual reports and in the internet?                                                | 1            |        |
| <b>Maximum possible score for Community Involvement</b>   |                                                                                                                                                                 | <b>6</b>     |        |
| <b>Total score attained for Community Involvement</b>     |                                                                                                                                                                 | <b>5</b>     |        |
| <b>Weight for Community Involvement</b>                   |                                                                                                                                                                 | <b>0.05</b>  |        |
| <b>Total weighted score for Community Involvement</b>     |                                                                                                                                                                 | <b>0.042</b> |        |

|                                                                 |  |
|-----------------------------------------------------------------|--|
| TABLE 12.9                                                      |  |
| NON-TECHNICAL (MANAGEMENT) COMPLIANCE SCORING:                  |  |
| Total Weighted Scoring for Dzingahe Package plant <u>97.0 %</u> |  |

| Compliance Criterion                                | Weighted Score |
|-----------------------------------------------------|----------------|
| <b>2. NON-TECHNICAL ASSESSMENT</b>                  |                |
| <b>2A: Management Issues</b>                        | <b>0.1</b>     |
| <b>2B: Management Practices</b>                     | <b>0.2</b>     |
| <b>2C: Human Resources</b>                          | <b>0.178</b>   |
| <b>2D: Financial Systems</b>                        | <b>0.1</b>     |
| <b>2E: Communication Systems</b>                    | <b>0.2</b>     |
| <b>2F: Safety, Health and Environmental Quality</b> | <b>0.15</b>    |
| <b>2G: Community Involvement and Awareness</b>      | <b>0.042</b>   |
| <b>TOTAL WEIGHTED SCORE</b>                         | <b>0.97</b>    |

| TABLE 12.10<br>NON-TECHNICAL (MANAGEMENT) COMPLIANCE RATING: |                                                                                                       |
|--------------------------------------------------------------|-------------------------------------------------------------------------------------------------------|
| Total Weighted Score                                         | Rating Description                                                                                    |
| 0 – 50                                                       | <i>Class 3 Compliance:</i><br>Total non-compliance; serious and immediate intervention required (TAC) |
| 50 – 90                                                      | <i>Class 2 Compliance:</i><br>Serious challenges requiring attention and improvement                  |
| 90 – 100                                                     | <i>Class 1 Compliance:</i><br>Acceptable compliance                                                   |



**Table S2.** Ranking of the Problem Areas in Priority Order after the first assessment.

|          |                                  | <b>1A. Design aspect</b> | <b>1D. Plant Monitoring Practices</b> | <b>1F. Risk Management Practices</b> |
|----------|----------------------------------|--------------------------|---------------------------------------|--------------------------------------|
| <b>1</b> | Insignificant Health Consequence |                          |                                       |                                      |
| <b>2</b> | Minor Health Consequence         |                          |                                       |                                      |
| <b>3</b> | Moderate Health Consequence      | <b>3</b>                 | <b>3</b>                              |                                      |
| <b>4</b> | Major Health Consequence         |                          |                                       | <b>4</b>                             |
| <b>5</b> | Catastrophic Health Consequence  |                          |                                       |                                      |
